# Supplementary material for: Respectful delivery care and associated factors among mothers delivered in public health facilities of Dessie city, Northeast Ethiopia: a cross-sectional study
Source: PubMed Central journal article supplement (PMC9026676; doi:10.1186/s12905-022-01713-1), 2022-04-21
Supplement: 12905_2022_1713_MOESM1_ESM.pdf [file 12905_2022_1713_MOESM1_ESM.pdf]

| Q100 | Q101 | Q102     | Q103    | Q104       | Q105       | Q106   | Q107      | Q201 |
|------|------|----------|---------|------------|------------|--------|-----------|------|
|      | 1    | 22 urban | married | grade1to8  | orthodox   | amhara | housewife | yes  |
|      | 2    | 20 rural | married | grade9to12 | muslim     | amhara | housewife | yes  |
|      | 3    | 22 urban | married | grade9to12 | orthodox   | amhara | governmen | yes  |
|      | 4    | 28 urban | married | collegeand | muslim     | amhara | governmen | yes  |
|      | 5    | 27 urban | married | onlyreadan | muslim     | amhara | housewife | yes  |
|      | 6    | 21 urban | married | grade1to8  | orthodox   | amhara | housewife | yes  |
|      | 7    | 33 urban | married | collegeand | orthodox   | amhara | governmen | yes  |
|      | 8    | 30 urban | married | cannotreac | orthodox   | amhara | merchant  | yes  |
|      | 9    | 30 urban | married | collegeand | orthodox   | amhara | governmen | yes  |
|      | 10   | 30 rural | single  | cannotreac | muslim     | amhara | housewife | yes  |
|      | 11   | 22 rural | married | grade9to12 | muslim     | amhara | housewife | yes  |
|      | 12   | 30 urban | married | collegeand | muslim     | amhara | governmen | yes  |
|      | 13   | 30 urban | married | onlyreadan | muslim     | oromo  | housewife | yes  |
|      | 14   | 24 urban | married | grade9to12 | orthodox   | amhara | housewife | yes  |
|      | 15   | 23 urban | married | collegeand | muslim     | amhara | student   | yes  |
|      | 16   | 25 rural | married | collegeand | orthodox   | tigre  | housewife | yes  |
|      | 17   | 28 urban | married | grade9to12 | orthodox   | amhara | housewife | yes  |
|      | 18   | 32 urban | married | grade9to12 | muslim     | oromo  | merchant  | yes  |
|      | 19   | 25 urban | married | collegeand | orthodox   | amhara | housewife | yes  |
|      | 20   | 20 rural | married | cannotreac | muslim     | amhara | student   | yes  |
|      | 21   | 30 urban | married | collegeand | protestant | amhara | merchant  | yes  |
|      | 22   | 20 rural | married | grade1to8  | muslim     | amhara | merchant  | yes  |
|      | 23   | 30 urban | married | grade1to8  | muslim     | amhara | housewife | yes  |
|      | 24   | 35 urban | married | grade9to12 | muslim     | amhara | housewife | yes  |
|      | 25   | 24 urban | married | grade1to8  | muslim     | amhara | housewife | yes  |
|      | 26   | 27 urban | married | grade1to8  | orthodox   | amhara | housewife | yes  |
|      | 27   | 40 rural | married | cannotreac | muslim     | amhara | student   | yes  |
|      | 28   | 30 urban | married | grade1to8  | orthodox   | amhara | housewife | yes  |
|      | 29   | 20 rural | married | grade1to8  | muslim     | amhara | housewife | yes  |
|      | 30   | 28 urban | married | grade1to8  | muslim     | oromo  | merchant  | yes  |
|      | 31   | 32 urban | married | grade9to12 | muslim     | amhara | housewife | yes  |
|      | 32   | 24 urban | married | collegeand | muslim     | amhara | governmen | yes  |
|      | 33   | 20 rural | married | cannotreac | muslim     | amhara | housewife | yes  |
|      | 34   | 25 urban | married | grade9to12 | orthodox   | amhara | housewife | yes  |
|      | 35   | 24 urban | married | grade9to12 | orthodox   | amhara | student   | yes  |
|      | 36   | 26 rural | married | grade9to12 | muslim     | amhara | housewife | yes  |
|      | 37   | 24 rural | married | collegeand | muslim     | amhara | governmen | yes  |
|      | 38   | 40 urban | married | cannotreac | orthodox   | amhara | housewife | yes  |
|      | 39   | 22 rural | married | grade1to8  | muslim     | oromo  | housewife | yes  |
|      | 40   | 28 urban | married | collegeand | muslim     | amhara | governmen | yes  |
|      | 41   | 27 rural | married | grade1to8  | muslim     | amhara | housewife | no   |
|      | 42   | 22 urban | married | collegeand | muslim     | amhara | housewife | yes  |
|      | 43   | 29 urban | married | collegeand | muslim     | amhara | governmen | yes  |
|      | 44   | 28 urban | married | collegeand | orthodox   | amhara | student   | yes  |
|      | 45   | 21 rural | married | cannotreac | muslim     | amhara | housewife | no   |
|      | 46   | 24 urban | married | collegeand | muslim     | amhara | housewife | no   |
|      | 47   | 20 rural | married | grade1to8  | muslim     | amhara | housewife | no   |
|      | 48   | 28 urban | married | collegeand | muslim     | amhara | student   | no   |
|      | 49   | 23 rural | married | collegeand | muslim     | amhara | governmen | yes  |
|      | 50   | 22 urban | married | grade1to8  | orthodox   | amhara | housewife | no   |
|      | 51   | 28 rural | married | grade9to12 | muslim     | amhara | housewife | no   |

|     |    |       |         |                      |        |            |     |
|-----|----|-------|---------|----------------------|--------|------------|-----|
| 52  | 31 | urban | married | cannotreac muslim    | amhara | housewife  | yes |
| 53  | 24 | urban | married | collegeand orthodox  | amhara | housewife  | no  |
| 54  | 30 | urban | married | collegeand orthodox  | amhara | privateemp | no  |
| 55  | 31 | urban | married | cannotreac muslim    | amhara | housewife  | no  |
| 56  | 23 | urban | married | collegeand orthodox  | amhara | student    | yes |
| 57  | 23 | urban | married | grade1to8 muslim     | amhara | housewife  | no  |
| 58  | 27 | urban | married | grade9to12 orthodox  | amhara | housewife  | yes |
| 59  | 22 | urban | married | grade1to8 orthodox   | amhara | housewife  | yes |
| 60  | 27 | urban | married | onlyreadan orthodox  | amhara | housewife  | yes |
| 61  | 24 | urban | married | grade1to8 muslim     | amhara | housewife  | yes |
| 62  | 28 | urban | married | grade9to12 muslim    | amhara | housewife  | yes |
| 63  | 22 | urban | married | grade9to12 muslim    | amhara | housewife  | yes |
| 64  | 29 | urban | married | onlyreadan muslim    | amhara | housewife  | yes |
| 65  | 25 | urban | married | grade9to12 muslim    | amhara | housewife  | yes |
| 66  | 30 | urban | married | grade9to12 orthodox  | amhara | housewife  | yes |
| 67  | 25 | rural | married | cannotreac orthodox  | amhara | governmen  | yes |
| 68  | 24 | urban | married | grade9to12 muslim    | amhara | housewife  | yes |
| 69  | 35 | rural | married | cannotreac muslim    | amhara | governmen  | yes |
| 70  | 27 | urban | married | grade9to12 muslim    | amhara | housewife  | yes |
| 71  | 26 | urban | married | collegeand muslim    | amhara | housewife  | yes |
| 72  | 28 | urban | married | grade9to12 orthodox  | amhara | housewife  | yes |
| 73  | 25 | urban | married | grade9to12 muslim    | amhara | housewife  | yes |
| 74  | 30 | urban | married | grade1to8 muslim     | amhara | housewife  | yes |
| 75  | 37 | urban | married | grade9to12 muslim    | oromo  | housewife  | yes |
| 76  | 26 | urban | single  | grade1to8 muslim     | amhara | privateemp | yes |
| 77  | 22 | urban | married | collegeand muslim    | amhara | student    | yes |
| 78  | 26 | urban | married | grade9to12 orthodox  | amhara | governmen  | yes |
| 79  | 25 | urban | single  | onlyreadan muslim    | amhara | merchant   | yes |
| 80  | 30 | rural | married | cannotreac muslim    | amhara | housewife  | yes |
| 81  | 25 | rural | married | grade9to12 muslim    | amhara | housewife  | yes |
| 82  | 25 | urban | married | grade9to12 muslim    | amhara | housewife  | yes |
| 83  | 25 | rural | married | grade1to8 muslim     | amhara | housewife  | yes |
| 84  | 26 | rural | married | grade1to8 muslim     | amhara | housewife  | yes |
| 85  | 26 | rural | married | grade9to12 muslim    | amhara | housewife  | yes |
| 86  | 39 | rural | married | cannotreac muslim    | amhara | student    | yes |
| 87  | 30 | urban | married | collegeand muslim    | amhara | governmen  | yes |
| 88  | 35 | urban | married | grade1to8 protestant | amhara | housewife  | yes |
| 89  | 25 | urban | married | grade1to8 muslim     | amhara | housewife  | yes |
| 90  | 27 | rural | married | grade1to8 muslim     | amhara | housewife  | yes |
| 91  | 27 | urban | married | grade9to12 muslim    | amhara | housewife  | yes |
| 92  | 20 | rural | married | grade1to8 muslim     | oromo  | housewife  | yes |
| 93  | 23 | rural | married | onlyreadan muslim    | amhara | housewife  | yes |
| 94  | 22 | urban | married | grade1to8 muslim     | amhara | merchant   | yes |
| 96  | 24 | rural | married | grade9to12 muslim    | amhara | privateemp | yes |
| 96  | 28 | urban | married | cannotreac muslim    | amhara | housewife  | yes |
| 97  | 34 | rural | married | cannotreac muslim    | amhara | housewife  | yes |
| 98  | 26 | urban | married | grade9to12 muslim    | amhara | housewife  | yes |
| 99  | 27 | urban | single  | cannotreac muslim    | amhara | housewife  | yes |
| 100 | 27 | urban | married | onlyreadan muslim    | amhara | housewife  | no  |
| 101 | 19 | rural | married | grade1to8 muslim     | amhara | housewife  | yes |
| 102 | 35 | urban | married | grade9to12 muslim    | amhara | merchant   | yes |
| 103 | 32 | urban | married | grade9to12 muslim    | amhara | merchant   | yes |

|     |    |       |         |            |            |        |            |     |
|-----|----|-------|---------|------------|------------|--------|------------|-----|
| 104 | 30 | urban | married | cannotreac | orthodox   | amhara | merchant   | yes |
| 105 | 30 | urban | married | grade9to12 | muslim     | amhara | housewife  | yes |
| 106 | 32 | rural | married | onlyreadan | muslim     | amhara | merchant   | yes |
| 107 | 28 | urban | married | grade9to12 | muslim     | amhara | housewife  | yes |
| 108 | 25 | rural | married | grade1to8  | muslim     | amhara | housewife  | yes |
| 109 | 22 | urban | married | grade1to8  | muslim     | amhara | housewife  | yes |
| 110 | 19 | urban | married | grade9to12 | protestant | amhara | merchant   | yes |
| 111 | 25 | rural | married | cannotreac | muslim     | amhara | housewife  | yes |
| 112 | 26 | urban | married | collegeand | muslim     | amhara | housewife  | yes |
| 113 | 40 | rural | married | cannotreac | muslim     | amhara | housewife  | yes |
| 114 | 28 | urban | married | grade9to12 | muslim     | amhara | housewife  | no  |
| 115 | 26 | urban | married | grade9to12 | muslim     | amhara | governmen  | yes |
| 116 | 33 | urban | married | grade1to8  | muslim     | amhara | housewife  | yes |
| 117 | 28 | urban | married | grade9to12 | muslim     | amhara | housewife  | no  |
| 118 | 22 | urban | married | grade9to12 | muslim     | amhara | housewife  | no  |
| 119 | 25 | urban | married | grade1to8  | muslim     | amhara | housewife  | no  |
| 120 | 28 | urban | married | collegeand | orthodox   | amhara | privateemp | yes |
| 121 | 24 | rural | married | cannotreac | muslim     | amhara | student    | yes |
| 122 | 30 | rural | married | cannotreac | orthodox   | amhara | student    | yes |
| 123 | 20 | urban | married | grade1to8  | muslim     | amhara | housewife  | yes |
| 124 | 28 | rural | married | grade9to12 | muslim     | amhara | privateemp | yes |
| 125 | 27 | urban | married | grade1to8  | muslim     | amhara | housewife  | yes |
| 126 | 24 | rural | married | grade1to8  | orthodox   | amhara | housewife  | no  |
| 127 | 27 | urban | married | onlyreadan | orthodox   | amhara | privateemp | yes |
| 128 | 30 | urban | married | grade1to8  | protestant | oromo  | merchant   | no  |
| 129 | 27 | urban | married | grade9to12 | protestant | amhara | privateemp | no  |
| 130 | 39 | urban | single  | onlyreadan | muslim     | oromo  | governmen  | yes |
| 131 | 27 | urban | married | grade1to8  | muslim     | amhara | housewife  | yes |
| 132 | 30 | rural | married | cannotreac | muslim     | oromo  | student    | no  |
| 133 | 21 | rural | married | onlyreadan | muslim     | amhara | housewife  | yes |
| 134 | 30 | rural | married | cannotreac | orthodox   | amhara | housewife  | yes |
| 135 | 36 | rural | married | onlyreadan | muslim     | amhara | housewife  | no  |
| 136 | 36 | rural | married | onlyreadan | muslim     | amhara | housewife  | no  |
| 137 | 25 | urban | married | grade1to8  | muslim     | amhara | housewife  | yes |
| 138 | 30 | urban | married | cannotreac | muslim     | amhara | housewife  | yes |
| 139 | 27 | rural | married | grade9to12 | muslim     | amhara | housewife  | yes |
| 140 | 24 | rural | married | grade9to12 | orthodox   | amhara | housewife  | yes |
| 141 | 30 | urban | married | cannotreac | orthodox   | amhara | housewife  | yes |
| 142 | 30 | rural | married | cannotreac | muslim     | amhara | student    | yes |
| 143 | 25 | rural | married | grade1to8  | muslim     | amhara | student    | yes |
| 144 | 29 | urban | married | grade9to12 | muslim     | amhara | housewife  | yes |
| 145 | 23 | urban | married | grade9to12 | orthodox   | amhara | housewife  | yes |
| 146 | 25 | urban | married | grade1to8  | muslim     | amhara | housewife  | yes |
| 147 | 27 | urban | married | grade1to8  | muslim     | amhara | housewife  | yes |
| 148 | 24 | urban | married | grade9to12 | muslim     | amhara | housewife  | yes |
| 149 | 37 | rural | married | grade1to8  | muslim     | amhara | housewife  | yes |
| 150 | 24 | rural | married | cannotreac | orthodox   | amhara | housewife  | yes |
| 151 | 24 | rural | married | cannotreac | muslim     | amhara | housewife  | no  |
| 152 | 29 | urban | married | grade1to8  | muslim     | amhara | housewife  | yes |
| 153 | 20 | rural | married | grade1to8  | orthodox   | amhara | housewife  | no  |
| 154 | 30 | urban | married | grade9to12 | orthodox   | amhara | housewife  | yes |
| 155 | 27 | urban | married | collegeand | muslim     | amhara | governmen  | yes |

|     |    |       |         |            |            |        |            |     |
|-----|----|-------|---------|------------|------------|--------|------------|-----|
| 156 | 25 | urban | married | grade9to12 | orthodox   | amhara | student    | yes |
| 157 | 39 | rural | married | cannotread | muslim     | amhara | housewife  | yes |
| 158 | 23 | urban | married | grade9to12 | orthodox   | tigre  | student    | yes |
| 159 | 32 | urban | married | grade9to12 | muslim     | amhara | housewife  | yes |
| 160 | 34 | urban | married | grade1to8  | muslim     | amhara | housewife  | yes |
| 161 | 34 | urban | married | grade9to12 | protestant | amhara | housewife  | yes |
| 162 | 29 | urban | married | grade1to8  | muslim     | amhara | merchant   | yes |
| 163 | 23 | urban | married | grade9to12 | orthodox   | tigre  | housewife  | yes |
| 164 | 22 | urban | married | cannotread | orthodox   | amhara | housewife  | yes |
| 165 | 25 | rural | married | grade1to8  | muslim     | amhara | housewife  | yes |
| 166 | 24 | urban | married | onlyread   | muslim     | amhara | merchant   | yes |
| 167 | 21 | urban | married | grade9to12 | orthodox   | amhara | housewife  | yes |
| 168 | 33 | urban | married | collegeand | muslim     | amhara | government | yes |
| 169 | 34 | urban | married | collegeand | orthodox   | amhara | government | yes |
| 170 | 22 | urban | married | collegeand | muslim     | amhara | government | yes |
| 171 | 31 | rural | married | cannotread | muslim     | amhara | student    | yes |
| 172 | 35 | urban | married | grade1to8  | muslim     | amhara | housewife  | yes |
| 173 | 23 | urban | married | grade9to12 | muslim     | amhara | housewife  | yes |
| 174 | 22 | urban | married | grade9to12 | orthodox   | oromo  | government | yes |
| 175 | 24 | urban | married | grade9to12 | orthodox   | amhara | housewife  | yes |
| 176 | 30 | rural | married | cannotread | muslim     | amhara | housewife  | yes |
| 177 | 24 | urban | married | cannotread | orthodox   | amhara | housewife  | yes |
| 178 | 23 | urban | married | grade1to8  | muslim     | amhara | housewife  | yes |
| 179 | 28 | urban | married | grade9to12 | muslim     | amhara | housewife  | yes |
| 180 | 32 | urban | married | grade1to8  | muslim     | amhara | housewife  | yes |
| 181 | 18 | urban | married | grade9to12 | muslim     | amhara | housewife  | yes |
| 182 | 18 | urban | married | grade1to8  | muslim     | amhara | housewife  | yes |
| 183 | 28 | urban | married | grade9to12 | orthodox   | amhara | housewife  | yes |
| 184 | 26 | urban | married | grade9to12 | orthodox   | amhara | housewife  | yes |
| 185 | 25 | urban | married | collegeand | orthodox   | amhara | government | yes |
| 186 | 25 | rural | married | grade9to12 | muslim     | amhara | housewife  | yes |
| 187 | 24 | urban | married | collegeand | orthodox   | amhara | government | yes |
| 188 | 20 | urban | married | grade9to12 | muslim     | amhara | housewife  | yes |
| 189 | 26 | urban | married | collegeand | protestant | amhara | government | no  |
| 190 | 29 | urban | married | grade9to12 | muslim     | amhara | housewife  | yes |
| 191 | 33 | rural | married | grade1to8  | muslim     | amhara | housewife  | yes |
| 192 | 22 | urban | married | grade1to8  | muslim     | amhara | housewife  | yes |
| 193 | 22 | urban | married | grade9to12 | muslim     | amhara | housewife  | yes |
| 194 | 18 | urban | married | grade1to8  | muslim     | amhara | housewife  | yes |
| 195 | 22 | urban | single  | grade1to8  | muslim     | amhara | privateemp | yes |
| 196 | 35 | urban | married | cannotread | muslim     | amhara | housewife  | yes |
| 197 | 34 | urban | married | grade9to12 | muslim     | amhara | merchant   | yes |
| 198 | 36 | urban | married | onlyread   | protestant | amhara | housewife  | yes |
| 199 | 26 | urban | married | grade1to8  | orthodox   | amhara | housewife  | yes |
| 200 | 25 | rural | married | grade9to12 | muslim     | amhara | housewife  | yes |
| 201 | 30 | rural | married | grade1to8  | muslim     | amhara | housewife  | yes |
| 202 | 30 | urban | married | cannotread | muslim     | amhara | housewife  | no  |
| 203 | 23 | rural | married | grade1to8  | muslim     | amhara | housewife  | yes |
| 204 | 23 | rural | married | grade9to12 | muslim     | amhara | housewife  | yes |
| 205 | 26 | urban | married | collegeand | orthodox   | amhara | government | yes |
| 206 | 30 | urban | married | grade9to12 | muslim     | amhara | housewife  | yes |
| 207 | 20 | rural | married | grade1to8  | muslim     | amhara | housewife  | yes |

|     |          |         |                       |        |            |     |
|-----|----------|---------|-----------------------|--------|------------|-----|
| 208 | 30 rural | married | cannotreac muslim     | amhara | housewife  | yes |
| 209 | 21 rural | married | grade1to8 muslim      | amhara | student    | yes |
| 210 | 26 rural | married | onlyreadan muslim     | amhara | housewife  | yes |
| 211 | 30 urban | married | grade1to8 muslim      | amhara | housewife  | yes |
| 212 | 18 urban | single  | grade1to8 muslim      | amhara | student    | yes |
| 213 | 37 rural | married | onlyreadan muslim     | amhara | housewife  | yes |
| 214 | 39 urban | single  | grade1to8 protestant  | tigre  | housewife  | yes |
| 215 | 22 rural | married | grade9to12 muslim     | amhara | housewife  | yes |
| 216 | 25 urban | married | grade9to12 muslim     | amhara | housewife  | yes |
| 217 | 30 urban | married | grade9to12 orthodox   | amhara | student    | yes |
| 218 | 27 rural | married | grade9to12 muslim     | amhara | housewife  | yes |
| 219 | 38 rural | married | onlyreadan orthodox   | amhara | housewife  | yes |
| 220 | 28 urban | married | grade9to12 muslim     | amhara | merchant   | yes |
| 221 | 22 urban | married | grade1to8 muslim      | amhara | privateemp | yes |
| 222 | 38 urban | married | cannotreac muslim     | amhara | housewife  | yes |
| 223 | 19 urban | single  | grade9to12 protestant | amhara | student    | yes |
| 224 | 28 urban | married | grade1to8 muslim      | amhara | housewife  | yes |
| 225 | 26 rural | married | grade9to12 orthodox   | amhara | housewife  | yes |
| 226 | 25 rural | married | cannotreac orthodox   | amhara | student    | yes |
| 227 | 32 rural | married | cannotreac orthodox   | amhara | student    | no  |
| 228 | 32 rural | married | grade9to12 orthodox   | amhara | student    | yes |
| 229 | 31 rural | married | cannotreac orthodox   | amhara | student    | yes |
| 230 | 28 urban | married | collegeand orthodox   | amhara | governmen  | yes |
| 231 | 30 urban | married | grade9to12 orthodox   | amhara | housewife  | yes |
| 232 | 27 urban | married | collegeand orthodox   | amhara | privateemp | no  |
| 233 | 25 rural | married | grade9to12 orthodox   | amhara | housewife  | no  |
| 234 | 31 rural | married | onlyreadan orthodox   | amhara | housewife  | no  |
| 235 | 32 urban | married | cannotreac muslim     | amhara | housewife  | yes |
| 236 | 24 urban | married | grade9to12 orthodox   | amhara | housewife  | yes |
| 237 | 24 urban | single  | grade9to12 orthodox   | amhara | student    | yes |
| 238 | 40 urban | married | cannotreac muslim     | amhara | housewife  | yes |
| 239 | 30 urban | married | collegeand orthodox   | amhara | governmen  | yes |
| 240 | 28 urban | married | collegeand muslim     | amhara | governmen  | yes |
| 241 | 29 rural | married | onlyreadan muslim     | amhara | housewife  | yes |
| 242 | 24 urban | married | grade9to12 muslim     | amhara | student    | yes |
| 243 | 22 urban | married | grade9to12 protestant | amhara | housewife  | yes |
| 244 | 29 urban | married | grade1to8 muslim      | amhara | merchant   | yes |
| 245 | 27 rural | married | cannotreac muslim     | amhara | housewife  | yes |
| 246 | 19 rural | married | onlyreadan muslim     | amhara | housewife  | yes |
| 247 | 34 rural | married | cannotreac orthodox   | oromo  | housewife  | yes |
| 248 | 38 rural | married | onlyreadan muslim     | amhara | housewife  | yes |
| 249 | 31 urban | married | grade1to8 muslim      | amhara | housewife  | yes |
| 250 | 30 urban | married | grade9to12 muslim     | amhara | housewife  | yes |
| 251 | 30 rural | married | cannotreac muslim     | amhara | student    | yes |
| 252 | 24 urban | married | collegeand muslim     | amhara | governmen  | yes |
| 253 | 28 rural | married | grade9to12 muslim     | amhara | merchant   | yes |
| 254 | 26 rural | married | onlyreadan orthodox   | amhara | student    | yes |
| 255 | 23 urban | married | grade9to12 muslim     | amhara | housewife  | yes |
| 256 | 34 urban | married | grade9to12 muslim     | amhara | housewife  | yes |
| 257 | 39 urban | married | grade9to12 muslim     | amhara | housewife  | yes |
| 258 | 28 rural | married | grade1to8 muslim      | amhara | housewife  | yes |
| 259 | 34 rural | married | cannotreac muslim     | amhara | student    | yes |

|     |    |       |         |                       |        |            |     |
|-----|----|-------|---------|-----------------------|--------|------------|-----|
| 260 | 23 | rural | married | onlyreadan muslim     | amhara | housewife  | yes |
| 261 | 26 | urban | married | grade1to8 muslim      | amhara | merchant   | yes |
| 262 | 29 | urban | married | grade1to8 orthodox    | amhara | student    | yes |
| 263 | 39 | urban | married | grade9to12 muslim     | amhara | housewife  | yes |
| 264 | 38 | urban | married | grade9to12 protestant | amhara | housewife  | yes |
| 265 | 33 | urban | married | collegeand orthodox   | amhara | governmen  | yes |
| 266 | 38 | urban | married | grade1to8 muslim      | amhara | housewife  | yes |
| 267 | 28 | urban | married | grade1to8 orthodox    | amhara | housewife  | yes |
| 268 | 24 | rural | married | grade9to12 muslim     | amhara | student    | yes |
| 269 | 38 | rural | married | cannotreac orthodox   | amhara | student    | yes |
| 270 | 32 | urban | married | grade1to8 orthodox    | tigre  | merchant   | yes |
| 271 | 34 | urban | married | grade1to8 muslim      | amhara | housewife  | no  |
| 272 | 27 | urban | married | grade9to12 muslim     | amhara | housewife  | yes |
| 273 | 23 | urban | married | grade1to8 muslim      | oromo  | student    | yes |
| 274 | 19 | urban | married | grade9to12 muslim     | amhara | student    | yes |
| 275 | 35 | urban | married | grade9to12 orthodox   | amhara | housewife  | yes |
| 276 | 39 | rural | married | onlyreadan orthodox   | amhara | housewife  | yes |
| 277 | 21 | rural | married | grade1to8 muslim      | amhara | student    | yes |
| 278 | 29 | urban | married | grade9to12 muslim     | tigre  | housewife  | yes |
| 279 | 26 | urban | married | grade9to12 orthodox   | amhara | housewife  | yes |
| 280 | 19 | urban | married | grade9to12 muslim     | amhara | student    | yes |
| 280 | 32 | urban | married | grade9to12 muslim     | amhara | merchant   | yes |
| 282 | 19 | urban | married | grade9to12 muslim     | amhara | student    | yes |
| 283 | 21 | urban | married | grade1to8 muslim      | amhara | student    | yes |
| 284 | 37 | urban | married | grade1to8 muslim      | oromo  | housewife  | yes |
| 285 | 24 | urban | married | grade9to12 muslim     | amhara | housewife  | yes |
| 286 | 29 | rural | married | onlyreadan orthodox   | amhara | housewife  | yes |
| 287 | 26 | rural | married | onlyreadan muslim     | amhara | housewife  | yes |
| 288 | 22 | rural | married | grade9to12 orthodox   | amhara | student    | yes |
| 289 | 30 | urban | married | grade1to8 muslim      | amhara | housewife  | yes |
| 290 | 28 | urban | married | grade9to12 muslim     | amhara | housewife  | yes |
| 291 | 31 | urban | married | collegeand orthodox   | amhara | governmen  | yes |
| 292 | 32 | urban | married | grade9to12 muslim     | amhara | merchant   | yes |
| 293 | 37 | rural | married | cannotreac muslim     | amhara | housewife  | yes |
| 294 | 39 | urban | married | grade1to8 orthodox    | amhara | housewife  | yes |
| 295 | 36 | urban | married | grade1to8 muslim      | amhara | housewife  | yes |
| 296 | 27 | urban | married | grade9to12 muslim     | amhara | merchant   | yes |
| 297 | 30 | rural | married | grade1to8 orthodox    | amhara | housewife  | yes |
| 298 | 35 | urban | married | grade9to12 muslim     | tigre  | merchant   | yes |
| 299 | 32 | urban | married | grade9to12 muslim     | amhara | housewife  | yes |
| 300 | 34 | rural | married | onlyreadan muslim     | amhara | housewife  | yes |
| 301 | 27 | urban | married | grade9to12 muslim     | amhara | housewife  | yes |
| 302 | 21 | urban | married | grade1to8 muslim      | amhara | housewife  | yes |
| 303 | 24 | rural | married | grade9to12 muslim     | amhara | housewife  | yes |
| 304 | 25 | urban | single  | cannotreac orthodox   | amhara | privateemp | yes |
| 305 | 24 | urban | married | collegeand muslim     | amhara | governmen  | yes |
| 306 | 30 | urban | married | grade9to12 muslim     | amhara | housewife  | no  |
| 307 | 32 | urban | married | onlyreadan muslim     | amhara | housewife  | yes |
| 308 | 20 | rural | married | grade1to8 muslim      | amhara | housewife  | yes |
| 309 | 28 | rural | married | cannotreac muslim     | amhara | housewife  | no  |
| 310 | 36 | urban | married | onlyreadan muslim     | amhara | housewife  | yes |
| 311 | 28 | urban | married | grade1to8 muslim      | amhara | housewife  | yes |

|     |    |       |         |            |            |        |            |     |
|-----|----|-------|---------|------------|------------|--------|------------|-----|
| 312 | 28 | urban | married | grade9to12 | muslim     | amhara | merchant   | yes |
| 313 | 28 | urban | married | grade9to12 | orthodox   | amhara | housewife  | yes |
| 314 | 31 | urban | married | grade1to8  | muslim     | amhara | merchant   | yes |
| 316 | 29 | urban | married | grade9to12 | orthodox   | amhara | housewife  | yes |
| 316 | 30 | urban | married | grade1to8  | orthodox   | amhara | housewife  | yes |
| 317 | 27 | urban | married | grade9to12 | muslim     | amhara | merchant   | yes |
| 318 | 26 | urban | married | collegeand | muslim     | amhara | governmen  | yes |
| 319 | 24 | urban | married | grade9to12 | orthodox   | amhara | governmen  | yes |
| 320 | 26 | urban | married | grade1to8  | muslim     | amhara | housewife  | yes |
| 321 | 29 | urban | married | grade9to12 | muslim     | amhara | housewife  | yes |
| 322 | 21 | urban | married | grade1to8  | muslim     | amhara | student    | yes |
| 323 | 26 | rural | married | grade9to12 | muslim     | amhara | merchant   | yes |
| 324 | 29 | urban | married | collegeand | muslim     | amhara | governmen  | yes |
| 325 | 30 | urban | married | grade9to12 | orthodox   | amhara | housewife  | yes |
| 326 | 25 | urban | married | grade9to12 | muslim     | amhara | student    | yes |
| 327 | 28 | urban | married | grade9to12 | orthodox   | amhara | housewife  | yes |
| 328 | 19 | urban | married | grade1to8  | muslim     | amhara | student    | yes |
| 329 | 28 | urban | married | collegeand | muslim     | amhara | governmen  | yes |
| 330 | 27 | urban | married | grade9to12 | orthodox   | amhara | housewife  | yes |
| 331 | 32 | urban | married | grade1to8  | muslim     | amhara | housewife  | yes |
| 332 | 28 | urban | married | grade1to8  | muslim     | amhara | merchant   | yes |
| 333 | 31 | rural | married | cannotreac | muslim     | amhara | housewife  | yes |
| 334 | 27 | urban | married | grade1to8  | muslim     | amhara | housewife  | yes |
| 335 | 24 | urban | married | grade9to12 | muslim     | amhara | privateemp | no  |
| 336 | 35 | rural | married | onlyreadan | muslim     | amhara | housewife  | yes |
| 337 | 21 | rural | married | grade9to12 | muslim     | amhara | housewife  | no  |
| 338 | 24 | rural | married | grade1to8  | muslim     | amhara | housewife  | yes |
| 339 | 28 | urban | married | grade9to12 | protestant | amhara | housewife  | yes |
| 340 | 34 | rural | married | grade1to8  | orthodox   | amhara | housewife  | yes |
| 341 | 24 | urban | married | grade1to8  | orthodox   | amhara | housewife  | yes |
| 342 | 19 | urban | married | grade9to12 | muslim     | amhara | student    | yes |
| 343 | 28 | urban | married | grade1to8  | muslim     | amhara | housewife  | yes |
| 344 | 26 | urban | married | grade9to12 | orthodox   | amhara | housewife  | yes |
| 345 | 21 | rural | married | grade1to8  | muslim     | amhara | housewife  | yes |
| 346 | 24 | rural | married | grade1to8  | muslim     | amhara | housewife  | yes |
| 347 | 21 | urban | married | grade1to8  | muslim     | amhara | merchant   | yes |
| 348 | 26 | rural | married | onlyreadan | muslim     | amhara | housewife  | yes |
| 349 | 32 | rural | married | onlyreadan | muslim     | amhara | housewife  | yes |
| 350 | 29 | rural | married | onlyreadan | orthodox   | amhara | housewife  | yes |
| 351 | 24 | rural | married | grade1to8  | muslim     | amhara | housewife  | yes |
| 352 | 24 | urban | married | grade9to12 | muslim     | amhara | housewife  | yes |
| 353 | 29 | rural | married | onlyreadan | muslim     | amhara | housewife  | yes |
| 354 | 31 | rural | married | grade1to8  | muslim     | amhara | housewife  | yes |
| 355 | 32 | urban | married | grade1to8  | orthodox   | amhara | housewife  | yes |
| 356 | 36 | rural | married | grade1to8  | muslim     | amhara | housewife  | yes |
| 357 | 33 | urban | married | grade1to8  | orthodox   | amhara | housewife  | yes |
| 358 | 28 | rural | married | grade1to8  | muslim     | amhara | housewife  | yes |
| 359 | 23 | urban | married | grade9to12 | muslim     | amhara | housewife  | yes |
| 360 | 29 | urban | married | collegeand | muslim     | amhara | governmen  | yes |
| 361 | 34 | rural | married | onlyreadan | orthodox   | amhara | housewife  | yes |
| 362 | 32 | urban | married | grade9to12 | muslim     | amhara | housewife  | yes |
| 363 | 28 | rural | married | onlyreadan | orthodox   | amhara | housewife  | yes |

|     |    |       |         |            |          |        |           |     |
|-----|----|-------|---------|------------|----------|--------|-----------|-----|
| 364 | 26 | urban | married | grade1to8  | muslim   | amhara | housewife | yes |
| 365 | 24 | urban | married | grade9to12 | muslim   | amhara | housewife | yes |
| 366 | 23 | rural | married | grade1to8  | muslim   | amhara | housewife | yes |
| 367 | 31 | urban | married | grade1to8  | orthodox | amhara | housewife | yes |
| 368 | 28 | rural | married | onlyreadan | muslim   | amhara | housewife | yes |
| 369 | 28 | rural | married | cannotreac | muslim   | tigre  | student   | yes |
| 370 | 32 | urban | married | grade9to12 | muslim   | amhara | housewife | yes |
| 371 | 28 | rural | married | onlyreadan | muslim   | oromo  | governmen | yes |
| 372 | 29 | urban | married | grade1to8  | muslim   | amhara | housewife | yes |
| 373 | 28 | rural | married | onlyreadan | orthodox | amhara | housewife | yes |
| 374 | 32 | urban | married | grade1to8  | orthodox | amhara | housewife | yes |
| 375 | 29 | rural | married | cannotreac | orthodox | amhara | housewife | yes |
| 376 | 30 | urban | married | grade1to8  | orthodox | amhara | merchant  | yes |
| 377 | 26 | urban | married | grade9to12 | muslim   | amhara | housewife | yes |
| 378 | 25 | rural | married | grade1to8  | orthodox | tigre  | housewife | yes |
| 379 | 36 | rural | married | onlyreadan | orthodox | amhara | housewife | yes |
| 380 | 28 | rural | married | grade1to8  | muslim   | amhara | housewife | yes |
| 381 | 22 | rural | married | grade1to8  | muslim   | amhara | housewife | yes |
| 382 | 26 | rural | married | grade9to12 | orthodox | amhara | housewife | yes |
| 383 | 19 | urban | married | grade9to12 | muslim   | amhara | housewife | yes |
| 384 | 21 | rural | married | grade1to8  | muslim   | amhara | housewife | yes |
| 385 | 21 | urban | married | grade9to12 | muslim   | amhara | housewife | yes |
| 386 | 24 | urban | married | grade9to12 | muslim   | amhara | housewife | yes |
| 387 | 27 | urban | married | grade9to12 | muslim   | amhara | housewife | yes |
| 388 | 18 | urban | married | grade1to8  | muslim   | amhara | housewife | yes |
| 389 | 28 | urban | married | grade9to12 | muslim   | amhara | housewife | yes |



| Q202 | Q203 | Q204 | Q205 | Q206 | Q207        | Q301 | Q302  | Q303 |
|------|------|------|------|------|-------------|------|-------|------|
| no   | no   | no   | no   | yes  | nonreactive |      | 2 yes | 6    |
| no   | no   | no   | yes  | yes  | nonreactive |      | 1 yes | 4    |
| no   | no   | yes  | no   | yes  | nonreactive |      | 1 yes | 5    |
| no   | no   | no   | yes  | yes  | nonreactive |      | 1 yes | 3    |
| no   | no   | yes  | no   | yes  | nonreactive |      | 2 yes | 3    |
| no   | no   | no   | no   | yes  | nonreactive |      | 1 yes | 4    |
| no   | yes  | yes  | no   | yes  | reactive    |      | 3 yes | 3    |
| no   | no   | no   | yes  | yes  | nonreactive |      | 1 yes | 3    |
| no   | no   | no   | no   | yes  | nonreactive |      | 2 yes | 4    |
| yes  | yes  | yes  | yes  | yes  | nonreactive |      | 3 yes | 3    |
| no   | no   | no   | yes  | yes  | nonreactive |      | 2 yes | 3    |
| yes  | no   | no   | yes  | yes  | nonreactive |      | 2 yes | 4    |
| no   | yes  | yes  | yes  | yes  | nonreactive |      | 2 yes | 2    |
| no   | no   | no   | no   | yes  | nonreactive |      | 1 yes | 3    |
| no   | no   | yes  | yes  | yes  | nonreactive |      | 1 yes | 7    |
| no   | no   | yes  | no   | yes  | nonreactive |      | 1 yes | 4    |
| no   | yes  | no   | no   | yes  | nonreactive |      | 2 yes | 4    |
| no   | no   | yes  | no   | yes  | nonreactive |      | 2 yes | 4    |
|      | no   | yes  | yes  | yes  | nonreactive |      | 1 no  | 4    |
| no   | no   | yes  | yes  | yes  | nonreactive |      | 2 yes | 5    |
| no   | yes  | yes  | no   | yes  | nonreactive |      | 2 yes | 3    |
| no   | no   | no   | yes  | yes  | nonreactive |      | 1 yes | 5    |
| no   | no   | no   | yes  | yes  | nonreactive |      | 4 yes | 4    |
| no   | no   | no   | yes  | yes  | nonreactive |      | 2 yes | 6    |
| no   | no   | yes  | yes  | yes  | nonreactive |      | 1 yes | 3    |
| no   | no   | yes  | yes  | yes  | nonreactive |      | 1 yes | 4    |
| no   | no   | yes  | yes  | yes  | nonreactive |      | 4 yes | 2    |
| yes  | yes  | no   | yes  | yes  | nonreactive |      | 2 yes | 2    |
| no   | no   | no   | yes  | yes  | nonreactive |      | 1 yes | 4    |
| no   | no   | yes  | yes  | yes  | nonreactive |      | 2 yes | 3    |
| no   | yes  | no   | yes  | yes  | nonreactive |      | 3 yes | 4    |
| no   | no   | yes  | no   | yes  | nonreactive |      | 1 yes | 4    |
| no   | no   | no   | yes  | yes  | nonreactive |      | 1 yes | 4    |
| no   | no   | yes  | yes  | yes  | nonreactive |      | 1 yes | 4    |
| no   | no   | no   | yes  | yes  | nonreactive |      | 1 yes | 2    |
| no   | yes  | yes  | yes  | yes  | nonreactive |      | 2 yes | 4    |
| no   | yes  | no   | yes  | yes  | nonreactive |      | 1 yes | 4    |
| no   | yes  | yes  | yes  | yes  | nonreactive |      | 2 yes | 4    |
|      | no   | no   | yes  | yes  | nonreactive |      | 1 no  |      |
| no   | no   | no   | no   | yes  | nonreactive |      | 2 yes | 5    |
| no   | no   | no   | yes  | yes  | nonreactive |      | 1 yes | 4    |
| no   | no   | yes  | no   | yes  | nonreactive |      | 1 yes | 4    |
| no   | no   | yes  | no   | yes  | nonreactive |      | 1 yes | 4    |
| no   | no   | no   | no   | yes  | nonreactive |      | 1 yes | 3    |
| no   | no   | no   | yes  | yes  | nonreactive |      | 1 yes | 4    |
| no   | no   | no   | no   | yes  | nonreactive |      | 1 yes | 5    |
| no   | no   | no   | yes  | yes  | nonreactive |      | 1 yes | 1    |
| no   | yes  | yes  | yes  | yes  | nonreactive |      | 2 yes | 5    |
| no   | no   | yes  | no   | yes  | nonreactive |      | 1 yes | 4    |
| no   | no   | no   | no   | no   | nonreactive |      | 2 yes | 6    |
| no   | no   | no   | no   | yes  | nonreactive |      | 3 yes | 3    |

|     |     |     |     |     |             |       |   |
|-----|-----|-----|-----|-----|-------------|-------|---|
| no  | no  | no  | yes | yes | nonreactive | 1 yes | 3 |
| no  | yes | no  | no  | yes | nonreactive | 2 yes | 3 |
| no  | yes | no  | no  | yes | nonreactive | 3 yes | 3 |
| no  | no  | no  | yes | yes | nonreactive | 1 yes | 4 |
| no  | no  | no  | no  | yes | nonreactive | 1 yes | 4 |
| yes | no  | no  | no  | yes | nonreactive | 1 yes | 5 |
| no  | no  | no  | no  | yes | nonreactive | 3 yes | 3 |
| no  | no  | yes | no  | yes | nonreactive | 1 yes | 3 |
| no  | no  | no  | no  | yes | nonreactive | 2 yes | 3 |
| no  | no  | no  | no  | yes | nonreactive | 1 yes | 3 |
| no  | no  | no  | no  | yes | nonreactive | 2 yes | 3 |
| no  | no  | no  | no  | yes | nonreactive | 1 yes | 3 |
| no  | no  | no  | no  | yes | nonreactive | 4 yes | 3 |
| no  | yes | yes | no  | yes | nonreactive | 2 yes | 4 |
| no  | no  | yes | no  | yes | reactive    | 1 yes | 4 |
| no  | no  | no  | no  | yes | nonreactive | 3 yes | 2 |
| no  | no  | no  | yes | yes | nonreactive | 1 yes | 3 |
| no  | no  | no  | yes | yes | nonreactive | 3 yes | 4 |
| no  | no  | no  | no  | yes | nonreactive | 1 yes | 4 |
| yes | yes | yes | no  | yes | nonreactive | 2 yes | 4 |
| no  | no  | no  | yes | yes | nonreactive | 1 yes | 4 |
| no  | yes | no  | no  | yes | nonreactive | 2 yes | 4 |
| no  | no  | no  | no  | yes | nonreactive | 2 yes | 4 |
| no  | no  | no  | no  | yes | nonreactive | 2 yes | 4 |
| no  | no  | no  | no  | yes | nonreactive | 3 yes | 4 |
| no  | yes | yes | no  | yes | nonreactive | 2 yes | 4 |
| no  | no  | yes | yes | yes | nonreactive | 2 yes | 2 |
| no  | yes | yes | no  | yes | nonreactive | 3 yes | 4 |
| no  | yes | no  | no  | yes | nonreactive | 2 yes | 1 |
| no  | no  | no  | no  | yes | nonreactive | 2 yes | 4 |
| no  | no  | no  | no  | yes | nonreactive | 1 yes | 3 |
| no  | no  | no  | no  | yes | nonreactive | 1 yes | 3 |
| no  | no  | no  | no  | yes | nonreactive | 2 yes | 3 |
| no  | no  | no  | no  | yes | nonreactive | 1 yes | 3 |
| no  | no  | no  | no  | yes | nonreactive | 1 yes | 3 |
| no  | yes | yes | yes | yes | nonreactive | 4 yes | 3 |
| no  | yes | yes | no  | yes | nonreactive | 3 yes | 1 |
| no  | yes | yes | no  | yes | nonreactive | 5 yes | 3 |
| no  | no  | yes | no  | yes | nonreactive | 1 yes | 5 |
| no  | no  | yes | no  | yes | nonreactive | 1 yes | 3 |
| no  | no  | yes | yes | yes | nonreactive | 2 yes | 3 |
| no  | no  | no  | yes | no  | reactive    | 1 yes | 1 |
| no  | no  | no  | yes | yes | nonreactive | 1 yes | 3 |
| yes | yes | yes | yes | yes | nonreactive | 1 yes | 4 |
| no  | no  | no  | no  | yes | nonreactive | 1 yes | 4 |
| no  | yes | yes | yes | yes | nonreactive | 2 yes | 3 |
| no  | no  | yes | yes | yes | nonreactive | 1 yes | 2 |
| no  | no  | no  | yes | yes | nonreactive | 1 yes | 4 |
| no  | no  | no  | no  | yes | nonreactive | 2 yes | 3 |
| no  | no  | yes | no  | no  | nonreactive | 3 yes | 4 |
| no  | no  | no  | yes | yes | nonreactive | 1 yes | 4 |
| no  | no  | no  | yes | yes | nonreactive | 6 yes | 4 |
| no  | yes | yes | no  | yes | nonreactive | 2 yes | 3 |

|     |     |     |     |     |             |        |   |
|-----|-----|-----|-----|-----|-------------|--------|---|
| no  | no  | yes | yes | no  | reactive    | 4 yes  | 4 |
| no  | yes | no  | no  | yes | nonreactive | 2 yes  | 4 |
| no  | yes | yes | yes | yes | nonreactive | 3 yes  | 4 |
| no  | yes | yes | no  | yes | nonreactive | 2 yes  | 4 |
| no  | yes | yes | yes | yes | nonreactive | 2 yes  | 3 |
| no  | no  | no  | no  | yes | nonreactive | 2 yes  | 5 |
| no  | no  | yes | no  | yes | nonreactive | 1 yes  | 4 |
| no  | yes | yes | yes | yes | nonreactive | 5 yes  | 2 |
| no  | yes | yes | yes | yes | nonreactive | 2 yes  | 4 |
| no  | no  | no  | yes | yes | nonreactive | 10 yes | 3 |
| no  | no  | no  | no  | yes | nonreactive | 2 yes  | 4 |
| no  | no  | no  | yes | yes | nonreactive | 2 yes  | 4 |
| no  | yes | yes | yes | yes | nonreactive | 4 yes  | 4 |
| no  | no  | no  | no  | yes | nonreactive | 2 yes  | 2 |
| no  | no  | yes | yes | yes | nonreactive | 1 yes  | 4 |
| no  | no  | no  | yes | yes | nonreactive | 1 yes  | 2 |
| no  | no  | no  | yes | yes | nonreactive | 3 yes  | 5 |
| no  | yes | no  | yes | yes | nonreactive | 3 yes  | 3 |
| no  | yes | no  | yes | yes | nonreactive | 1 yes  | 5 |
| no  | no  | no  | yes | yes | nonreactive | 2 yes  | 2 |
| no  | yes | no  | yes | yes | nonreactive | 3 yes  | 3 |
| no  | yes | no  | yes | yes | nonreactive | 4 yes  | 2 |
|     | no  | no  | yes | yes | nonreactive | 1 no   |   |
| no  | yes | yes | no  | yes | nonreactive | 2 yes  | 3 |
| no  | no  | yes | no  | yes | nonreactive | 3 yes  | 3 |
| no  | no  | yes | yes | yes | nonreactive | 2 yes  | 3 |
| no  | no  | yes | no  | yes | nonreactive | 4 yes  | 2 |
| yes | no  | no  | no  | yes | nonreactive | 6 yes  | 4 |
|     | no  | no  | yes | no  |             | 4 no   |   |
| yes | no  | no  | yes | yes | nonreactive | 1 yes  | 4 |
| no  | no  | yes | yes | yes | nonreactive | 1 yes  | 3 |
| no  | yes | yes | yes | yes | nonreactive | 4 yes  | 3 |
| yes | no  | no  | yes | yes | nonreactive | 4 yes  | 3 |
| no  | no  | no  | no  | yes | nonreactive | 1 yes  | 3 |
| no  | yes | no  | yes | yes | reactive    | 3 yes  | 3 |
| no  | no  | no  | yes | yes | nonreactive | 1 yes  | 4 |
|     | no  | no  | yes | yes | nonreactive | 1 no   |   |
| no  | no  | no  | yes | yes | nonreactive | 5 yes  | 3 |
| no  | no  | no  | yes | yes | nonreactive | 3 yes  | 3 |
| no  | no  | no  | yes | yes | nonreactive | 2 yes  | 4 |
| no  | no  | no  | yes | yes | nonreactive | 2 yes  | 4 |
| no  | no  | yes | yes | yes | nonreactive | 1 yes  | 3 |
| yes | no  | yes | yes | yes | nonreactive | 1 yes  | 2 |
| no  | no  | no  | yes | yes | nonreactive | 1 yes  | 3 |
| no  | no  | yes | yes | yes | nonreactive | 1 yes  | 4 |
| no  | no  | no  | yes | yes | nonreactive | 4 yes  | 4 |
| yes | no  | yes | yes | yes | nonreactive | 1 yes  | 3 |
| no  | yes | no  | yes | yes | nonreactive | 2 yes  | 4 |
| no  | yes | yes | no  | yes | reactive    | 3 yes  | 4 |
| no  | no  | yes | yes | yes | nonreactive | 2 yes  | 2 |
| no  | yes | yes | no  | yes | nonreactive | 3 yes  | 4 |
| no  | no  | yes | yes | yes | nonreactive | 2 yes  | 2 |
| no  | yes | yes | no  | yes | nonreactive | 3 yes  | 4 |
| no  | no  | yes | no  | yes | nonreactive | 1 yes  | 4 |

|     |     |     |     |     |             |       |   |
|-----|-----|-----|-----|-----|-------------|-------|---|
| no  | yes | no  | yes | yes | nonreactive | 2 yes | 4 |
| yes | yes | no  | yes | yes | nonreactive | 2 yes | 2 |
| no  | no  | no  | yes | yes | nonreactive | 1 yes | 4 |
| no  | no  | yes | no  | yes | nonreactive | 3 yes | 3 |
| no  | no  | no  | no  | yes | nonreactive | 3 yes | 3 |
| no  | yes | yes | no  | yes | reactive    | 2 yes | 5 |
| no  | yes | no  | no  | yes | nonreactive | 2 yes | 4 |
| no  | no  | no  | no  | yes | nonreactive | 2 yes | 4 |
| no  | no  | yes | no  | yes | nonreactive | 1 yes | 2 |
| no  | no  | yes | no  | yes | nonreactive | 2 yes | 4 |
| no  | yes | no  | no  | yes | nonreactive | 3 yes | 4 |
| no  | no  | no  | no  | yes | nonreactive | 1 yes | 4 |
| no  | yes | no  | no  | yes | nonreactive | 3 yes | 4 |
| no  | no  | yes | no  | yes | nonreactive | 4 yes | 4 |
| no  | no  | no  | no  | yes | nonreactive | 1 yes | 4 |
| no  | no  | yes | yes | yes | nonreactive | 5 yes | 4 |
| no  | no  | yes | no  | yes | nonreactive | 3 yes | 4 |
| no  | yes | yes | yes | yes | nonreactive | 2 yes | 4 |
| no  | no  | no  | yes | yes | nonreactive | 1 yes | 4 |
| no  | no  | yes | no  | yes | nonreactive | 2 yes | 4 |
| no  | no  | no  | yes | yes | nonreactive | 3 yes | 5 |
| no  | no  | no  | yes | yes | nonreactive | 1 yes | 4 |
| no  | no  | no  | yes | yes | nonreactive | 4 yes | 3 |
| no  | no  | no  | yes | yes | nonreactive | 1 yes | 4 |
| no  | no  | no  | yes | yes | nonreactive | 3 yes | 3 |
| no  | no  | no  | yes | yes | nonreactive | 1 yes | 4 |
| no  | no  | yes | yes | yes | reactive    | 1 yes | 5 |
| no  | no  | no  | yes | yes | nonreactive | 1 yes | 5 |
| yes | no  | no  | yes | yes | nonreactive | 1 yes | 6 |
| no  | no  | no  | no  | yes | nonreactive | 2 yes | 3 |
| no  | no  | no  | no  | yes | nonreactive | 1 yes | 4 |
| no  | no  | yes | no  | yes | nonreactive | 1 yes | 4 |
| no  | no  | yes | yes | yes | nonreactive | 1 yes | 4 |
| no  | no  | yes | no  | yes | nonreactive | 1 yes | 4 |
| no  | no  | no  | no  | yes | nonreactive | 1 yes | 3 |
| no  | no  | yes | no  | yes | nonreactive | 1 yes | 3 |
| yes | no  | no  | no  | yes | nonreactive | 1 yes | 3 |
| no  | no  | no  | no  | yes | nonreactive | 1 yes | 3 |
| no  | yes | yes | no  | yes | nonreactive | 1 yes | 4 |
| no  | no  | no  | no  | yes | nonreactive | 1 yes | 2 |
| no  | yes | no  | no  | yes | nonreactive | 1 yes | 3 |
| yes | no  | no  | no  | yes | nonreactive | 2 yes | 2 |
| no  | no  | no  | no  | yes | nonreactive | 3 yes | 3 |
| no  | yes | yes | no  | yes | nonreactive | 2 yes | 4 |
| no  | no  | no  | no  | yes | nonreactive | 1 no  | 4 |
| no  | yes | no  | no  | yes | nonreactive | 4 yes | 4 |
| no  | no  | no  | no  | yes | nonreactive | 5 yes | 3 |
| no  | yes | no  | yes | yes | nonreactive | 1 yes | 5 |
| no  | no  | yes | no  | yes | nonreactive | 1 yes | 4 |
| no  | no  | no  | no  | yes | nonreactive | 2 yes | 4 |
| no  | no  | yes | no  | yes | nonreactive | 1 yes | 3 |
| no  | no  | yes | no  | yes | reactive    | 3 yes | 3 |

|     |     |     |     |     |             |       |   |
|-----|-----|-----|-----|-----|-------------|-------|---|
| no  | yes | yes | yes | yes | nonreactive | 3 yes | 5 |
| no  | no  | yes | no  | yes | nonreactive | 1 yes | 5 |
| no  | no  | yes | no  | yes | nonreactive | 1 yes | 3 |
| no  | yes | no  | no  | yes | nonreactive | 6 yes | 4 |
|     | no  | yes | yes | yes | nonreactive | 1 no  |   |
| no  | yes | no  | no  | yes | nonreactive | 4 yes | 5 |
| no  | no  | no  | no  | yes | nonreactive | 7 yes | 4 |
| no  | no  | no  | no  | yes | nonreactive | 1 yes | 4 |
| no  | yes | yes | no  | yes | nonreactive | 3 yes | 4 |
| no  | no  | yes | no  | yes | nonreactive | 3 yes | 4 |
| no  | no  | yes | no  | yes | nonreactive | 2 yes | 3 |
| no  | no  | no  | yes | yes | nonreactive | 4 yes | 3 |
| no  | no  | no  | no  | yes | nonreactive | 1 yes | 3 |
| no  | no  | no  | yes | yes | nonreactive | 1 yes | 1 |
| no  | no  | yes | no  | yes | nonreactive | 5 yes | 6 |
| no  | no  | no  | no  | yes | nonreactive | 1 yes | 3 |
| no  | no  | no  | no  | yes | nonreactive | 2 yes | 4 |
| no  | no  | no  | yes | yes | reactive    | 3 yes | 3 |
|     | no  | yes | yes | yes | nonreactive | 5 no  |   |
|     | no  | yes | yes | yes | nonreactive | 5 no  |   |
| no  | no  | no  | yes | yes | nonreactive | 1 yes | 3 |
|     | no  | yes | yes | yes | nonreactive | 5 no  |   |
| no  | no  | no  | no  | yes | nonreactive | 2 yes | 2 |
| no  | no  | no  | yes | yes | nonreactive | 2 yes | 3 |
| no  | no  | no  | no  | yes | nonreactive | 2 yes | 4 |
| yes | no  | yes | yes | yes | nonreactive | 1 yes | 4 |
| yes | no  | no  | yes | yes | nonreactive | 2 yes | 3 |
| no  | yes | yes | yes | yes | nonreactive | 3 yes | 3 |
| no  | no  | no  | yes | yes | nonreactive | 1 yes | 3 |
| yes | yes | yes | yes | yes | reactive    | 1 yes | 4 |
| no  | no  | no  | yes | yes | nonreactive | 4 yes | 3 |
|     | no  | no  | no  | no  |             | 2 no  |   |
| no  | yes | no  | yes | yes | nonreactive | 2 yes | 3 |
| no  | no  | no  | yes | yes | nonreactive | 2 yes | 3 |
| no  | no  | no  | no  | yes | nonreactive | 1 yes | 4 |
| no  | no  | no  | no  | yes | nonreactive | 1 yes | 2 |
| no  | no  | no  | yes | yes | nonreactive | 1 yes | 4 |
| no  | no  | no  | yes | yes | nonreactive | 1 yes | 3 |
|     | no  | no  | yes | yes | nonreactive | 1 no  |   |
| no  | no  | no  | yes | yes | reactive    | 1 yes | 3 |
| no  | no  | yes | yes | yes | nonreactive | 3 yes | 2 |
| no  | no  | no  | yes | yes | reactive    | 2 yes | 2 |
| no  | yes | no  | no  | yes | nonreactive | 2 yes | 3 |
|     | no  | no  | yes | yes | nonreactive | 2 no  |   |
| no  | yes | yes | no  | yes | nonreactive | 1 yes | 4 |
| yes | no  | no  | yes | yes | nonreactive | 1 yes | 1 |
| no  | no  | no  | yes | yes | nonreactive | 1 yes | 3 |
| no  | no  | no  | no  | yes | nonreactive | 1 yes | 4 |
| no  | no  | no  | no  | yes | nonreactive | 4 yes | 2 |
| no  | yes | no  | no  | yes | nonreactive | 3 yes | 4 |
| no  | no  | no  | yes | yes | nonreactive | 2 yes | 3 |
| yes | no  | yes | yes | yes | nonreactive | 3 yes | 2 |

|     |     |     |     |     |             |       |   |
|-----|-----|-----|-----|-----|-------------|-------|---|
| no  | no  | no  | yes | yes | nonreactive | 1 yes | 2 |
| no  | no  | no  | yes | yes | nonreactive | 1 yes | 4 |
| no  | no  | no  | no  | yes | nonreactive | 1 yes | 4 |
| no  | yes | yes | no  | yes | nonreactive | 4 yes | 3 |
| yes | no  | no  | yes | yes | nonreactive | 5 yes | 3 |
| no  | yes | yes | no  | yes | nonreactive | 2 yes | 4 |
| no  | no  | no  | yes | yes | nonreactive | 6 yes | 3 |
| no  | no  | no  | yes | yes | nonreactive | 1 yes | 1 |
|     | no  | no  | yes | yes | nonreactive | 1 no  |   |
| yes | no  | no  | yes | yes | nonreactive | 6 yes | 2 |
| no  | no  | no  | no  | yes | nonreactive | 3 yes | 3 |
| no  | no  | no  | yes | yes | reactive    | 2 yes | 5 |
| no  | no  | yes | yes | yes | nonreactive | 2 yes | 4 |
| yes | no  | no  | yes | yes | nonreactive | 1 yes | 3 |
| no  | no  | no  | yes | yes | nonreactive | 1 yes | 3 |
| no  | no  | no  | no  | yes | nonreactive | 4 yes | 4 |
| no  | no  | yes | yes | yes | nonreactive | 7 yes | 3 |
| no  | no  | no  | yes | yes | nonreactive | 1 yes | 2 |
| yes | no  | no  | yes | yes | nonreactive | 2 yes | 2 |
| no  | no  | no  | no  | yes | nonreactive | 1 yes | 5 |
| no  | no  | no  | yes | yes | nonreactive | 1 yes | 2 |
| no  | no  | no  | yes | yes | nonreactive | 3 yes | 5 |
| no  | no  | no  | yes | yes | nonreactive | 1 yes | 3 |
| no  | no  | no  | yes | yes | nonreactive | 1 yes | 2 |
| no  | yes | no  | yes | yes | reactive    | 2 yes | 6 |
| no  | no  | yes | no  | yes | nonreactive | 1 yes | 4 |
| no  | no  | no  | yes | yes | nonreactive | 2 yes | 3 |
| no  | no  | no  | yes | yes | nonreactive | 2 yes | 2 |
| no  | no  | no  | yes | yes | nonreactive | 1 yes | 3 |
| no  | yes | no  | yes | yes | nonreactive | 3 yes | 3 |
| yes | no  | yes | no  | yes | nonreactive | 1 yes | 3 |
| no  | no  | no  | no  | yes | nonreactive | 1 yes | 4 |
| no  | no  | no  | no  | yes | nonreactive | 2 yes | 4 |
| no  | yes | no  | yes | yes | nonreactive | 6 yes | 2 |
| no  | no  | no  | yes | yes | nonreactive | 4 yes | 3 |
| no  | yes | no  | no  | yes | nonreactive | 3 yes | 3 |
| no  | no  | no  | yes | yes | nonreactive | 1 yes | 2 |
| no  | yes | no  | yes | yes | nonreactive | 3 yes | 2 |
| no  | no  | yes | no  | yes | nonreactive | 3 yes | 4 |
| no  | yes | yes | no  | yes | nonreactive | 3 yes | 3 |
| no  | no  | yes | yes | yes | nonreactive | 6 yes | 3 |
| yes | no  | no  | no  | yes | nonreactive | 2 yes | 3 |
| no  | no  | no  | no  | yes | nonreactive | 1 yes | 4 |
| no  | no  | yes | no  | yes | nonreactive | 2 yes | 2 |
| no  | no  | yes | no  | yes | nonreactive | 1 yes | 3 |
| no  | no  | yes | yes | yes | nonreactive | 1 yes | 4 |
| no  | yes | no  | no  | yes | nonreactive | 3 yes | 3 |
| no  | no  | yes | no  | yes | nonreactive | 3 yes | 4 |
| no  | yes | yes | no  | yes | nonreactive | 1 yes | 4 |
| no  | yes | yes | no  | yes | nonreactive | 4 yes | 3 |
| no  | yes | no  | no  | yes | nonreactive | 4 yes | 3 |
| no  | no  | no  | no  | yes | nonreactive | 1 yes | 2 |

|     |     |     |     |     |             |       |   |
|-----|-----|-----|-----|-----|-------------|-------|---|
| no  | no  | no  | no  | yes | nonreactive | 2 yes | 3 |
| no  | no  | yes | no  | yes | nonreactive | 2 yes | 4 |
| no  | no  | no  | no  | yes | nonreactive | 3 yes | 2 |
| no  | no  | yes | no  | yes | nonreactive | 2 yes | 3 |
| no  | no  | yes | no  | yes | nonreactive | 3 yes | 3 |
| yes | no  | yes | no  | yes | nonreactive | 2 yes | 2 |
| no  | no  | no  | no  | yes | nonreactive | 1 yes | 3 |
| no  | no  | no  | no  | yes | nonreactive | 1 yes | 2 |
| no  | no  | no  | no  | yes | nonreactive | 2 yes | 3 |
| no  | no  | yes | no  | yes | nonreactive | 2 yes | 2 |
| no  | no  | no  | no  | yes | nonreactive | 1 yes | 3 |
| yes | no  | no  | no  | yes | nonreactive | 1 yes | 3 |
| no  | yes | yes | no  | yes | nonreactive | 2 yes | 2 |
| no  | no  | yes | no  | yes | reactive    | 2 yes | 3 |
| no  | no  | no  | no  | yes | nonreactive | 1 yes | 2 |
| no  | no  | yes | no  | yes | nonreactive | 2 yes | 3 |
| no  | no  | no  | no  | yes | nonreactive | 1 yes | 3 |
| no  | no  | yes | no  | yes | nonreactive | 1 yes | 3 |
| no  | no  | yes | no  | yes | nonreactive | 1 yes | 1 |
| no  | no  | yes | no  | yes | nonreactive | 3 yes | 2 |
| no  | no  | yes | no  | yes | nonreactive | 1 yes | 3 |
| no  | no  | yes | no  | yes | nonreactive | 2 yes | 3 |
| no  | yes | yes | no  | yes | nonreactive | 3 yes | 3 |
| no  | no  | yes | no  | yes | nonreactive | 1 yes | 3 |
| no  | yes | yes | no  | yes | nonreactive | 3 yes | 4 |
| no  | no  | yes | no  | yes | nonreactive | 2 yes | 4 |
| yes | no  | yes | no  | yes | nonreactive | 2 yes | 2 |
| yes | no  | no  | no  | yes | nonreactive | 2 yes | 2 |
| no  | no  | yes | no  | yes | nonreactive | 3 yes | 2 |
| yes | no  | no  | no  | yes | reactive    | 1 yes | 5 |
| no  | no  | no  | no  | yes | nonreactive | 1 yes | 3 |
| no  | no  | yes | no  | yes | nonreactive | 2 yes | 3 |
| no  | no  | yes | no  | yes | nonreactive | 2 yes | 4 |
| no  | no  | no  | yes | yes | nonreactive | 1 yes | 2 |
| no  | no  | no  | yes | yes | nonreactive | 1 yes | 2 |
| no  | no  | yes | no  | yes | nonreactive | 1 yes | 3 |
| no  | no  | yes | no  | yes | nonreactive | 1 yes | 2 |
| no  | yes | yes | no  | yes | nonreactive | 4 yes | 3 |
| no  | no  | yes | no  | yes | nonreactive | 3 yes | 2 |
| no  | yes | yes | no  | yes | nonreactive | 2 yes | 2 |
| no  | no  | no  | no  | yes | nonreactive | 1 yes | 3 |
| no  | yes | no  | yes | yes | nonreactive | 2 yes | 2 |
| no  | no  | yes | yes | yes | nonreactive | 3 yes | 2 |
| yes | yes | yes | no  | yes | nonreactive | 3 yes | 3 |
| no  | no  | no  | yes | yes | nonreactive | 5 yes | 2 |
| no  | yes | yes | no  | yes | nonreactive | 3 yes | 3 |
| no  | no  | no  | yes | yes | nonreactive | 2 yes | 2 |
| no  | no  | yes | no  | yes | nonreactive | 1 yes | 3 |
| no  | no  | no  | yes | yes | nonreactive | 1 yes | 3 |
| no  | no  | yes | yes | yes | nonreactive | 4 yes | 2 |
| no  | yes | no  | no  | yes | reactive    | 2 yes | 4 |
| no  | no  | no  | yes | yes | nonreactive | 2 yes | 1 |

|     |     |     |     |     |             |       |   |
|-----|-----|-----|-----|-----|-------------|-------|---|
| yes | no  | yes | no  | yes | nonreactive | 1 yes | 2 |
| no  | no  | no  | yes | yes | nonreactive | 1 yes | 2 |
| no  | no  | no  | yes | yes | nonreactive | 1 yes | 2 |
| no  | no  | no  | yes | yes | nonreactive | 3 yes | 3 |
| no  | no  | no  | yes | yes | nonreactive | 2 yes | 2 |
| no  | no  | no  | yes | yes | nonreactive | 2 yes | 1 |
| no  | yes | yes | no  | yes | nonreactive | 2 yes | 5 |
| no  | no  | yes | yes | yes | nonreactive | 2 yes | 3 |
| no  | yes | yes | yes | yes | reactive    | 2 yes | 5 |
| no  | no  | no  | yes | yes | nonreactive | 2 yes | 2 |
| no  | no  | no  | yes | yes | nonreactive | 2 yes | 2 |
| no  | no  | no  | yes | yes | nonreactive | 2 yes | 2 |
| no  | yes | yes | yes | yes | nonreactive | 2 yes | 2 |
| no  | yes | yes | yes | yes | nonreactive | 3 yes | 3 |
| no  | yes | yes | no  | yes | nonreactive | 3 yes | 3 |
| no  | yes | no  | yes | yes | nonreactive | 3 yes | 4 |
| no  | yes | yes | no  | yes | nonreactive | 4 yes | 2 |
| no  | no  | yes | no  | yes | nonreactive | 2 yes | 3 |
| no  | no  | yes | no  | yes | nonreactive | 1 yes | 3 |
| no  | yes | yes | no  | yes | nonreactive | 2 yes | 2 |
| no  | no  | yes | no  | yes | nonreactive | 1 yes | 2 |
| no  | no  | yes | no  | yes | nonreactive | 2 yes | 3 |
| no  | no  | yes | no  | yes | nonreactive | 1 yes | 3 |
| yes | no  | yes | no  | yes | reactive    | 2 yes | 4 |
| no  | no  | no  | yes | yes | nonreactive | 1 yes | 5 |
| no  | no  | no  | yes | yes | nonreactive | 1 yes | 4 |
| yes | no  | yes | yes | yes | nonreactive | 1 yes | 3 |



| Q304 | Q305          | Q306 | Q307        | Q308 | Q309         | Q310  | Q311  | Q312        |
|------|---------------|------|-------------|------|--------------|-------|-------|-------------|
|      | 2 firststage  | no   |             | yes  | others       | alive | night | episiotomy  |
|      | 24 firststage | yes  | highdegree  | no   |              | alive | day   | episiotomy  |
|      | 4 secondstaç  | no   |             | no   |              | alive | night | SVD         |
|      | 12 firststage | no   |             | no   |              | alive | day   | cs          |
|      | 2 firststage  | no   |             | yes  | others       | alive | night | instrument: |
|      | 3 secondstaç  | no   |             | no   |              | alive | day   | SVD         |
|      | 3 secondstaç  | no   |             | no   |              | alive | day   | SVD         |
|      | 2 secondstaç  | no   |             | no   |              | alive | day   | SVD         |
|      | 1 firststage  | no   |             | no   |              | alive | day   | SVD         |
|      | 10 firststage | no   |             | no   |              | alive | day   | episiotomy  |
|      | 24 firststage | yes  | aph         | no   |              | alive | night | cs          |
|      | 8 secondstaç  | yes  | others      | no   |              | alive | day   | instrument: |
|      | 10 secondstaç | no   |             | no   |              | alive | night | SVD         |
|      | 8 secondstaç  | no   |             | no   |              | alive | day   | SVD         |
|      | 24 secondstaç | no   |             | no   |              | alive | day   | SVD         |
|      | 10 secondstaç | no   |             | yes  | distress     | alive | day   | instrument: |
|      | 1 secondstaç  | no   |             | no   |              | alive | day   | SVD         |
|      | 6 secondstaç  | no   |             | no   |              | alive | night | SVD         |
|      | 2 secondstaç  | yes  | others      | no   |              | alive | night | cs          |
|      | 24 secondstaç | yes  | pph         | no   |              | alive | night | SVD         |
|      | 3 firststage  | no   |             | no   |              | alive | day   | SVD         |
|      | 24 secondstaç | no   |             | no   |              | alive | night | cs          |
|      | 24 secondstaç | yes  | others      | no   |              | alive | night | cs          |
|      | 1 secondstaç  | no   |             | no   |              | alive | night | cs          |
|      | 15 secondstaç | no   |             | no   |              | alive | day   | SVD         |
|      | 12 secondstaç | no   |             | no   |              | alive | day   | SVD         |
|      | 12 secondstaç | yes  | pph         | no   |              | alive | day   | SVD         |
|      | 24 secondstaç | yes  | pph         | yes  | physicalinjt | died  | night | SVD         |
|      | 24 secondstaç | no   |             | no   |              | alive | night | SVD         |
|      | 4 firststage  | yes  | hypertensic | yes  | others       | died  | night | instrument: |
|      | 8 secondstaç  | no   |             | no   |              | alive | day   | SVD         |
|      | 8 secondstaç  | no   |             | no   |              | alive | day   | SVD         |
|      | 24 firststage | no   |             | no   |              | alive | day   | SVD         |
|      | 8 firststage  | no   |             | no   |              | alive | day   | SVD         |
|      | 10 firststage | no   |             | no   |              | alive | day   | SVD         |
|      | 10 firststage | yes  | others      | no   |              | alive | day   | cs          |
|      | 24 firststage | yes  | others      | no   |              | alive | day   | cs          |
|      | 5 secondstaç  | no   |             | no   |              | alive | night | cs          |
|      | 10 firststage | no   |             | no   |              | alive | night | SVD         |
|      | 2 secondstaç  | yes  | others      | no   |              | alive | day   | cs          |
|      | 1 firststage  | no   |             | yes  | distress     | alive | day   | episiotomy  |
|      | 1 firststage  | no   |             | no   |              | alive | day   | SVD         |
|      | 5 firststage  | no   |             | no   |              | alive | day   | episiotomy  |
|      | 8 firststage  | no   |             | no   |              | alive | day   | episiotomy  |
|      | 12 firststage | no   |             | yes  | distress     | alive | day   | cs          |
|      | 1 firststage  | no   |             | yes  | others       | alive | night | cs          |
|      | 1 firststage  | yes  | hypertensic | yes  | physicalinjt | died  | night | instrument: |
|      | 8 firststage  | no   |             | no   |              | alive | day   | SVD         |
|      | 8 secondstaç  | yes  | highdegree  | no   |              | alive | day   | SVD         |
|      | 1 firststage  | no   |             | no   |              | alive | night | SVD         |
|      | 5 firststage  | no   |             | no   |              | alive | day   | instrument: |

|    |            |     |             |     |              |       |       |             |
|----|------------|-----|-------------|-----|--------------|-------|-------|-------------|
| 15 | firststage | yes | highdegree  | no  |              | alive | day   | episiotomy  |
| 2  | firststage | yes | others      | no  |              | alive | day   | cs          |
| 2  | firststage | no  |             | no  |              | alive | day   | cs          |
| 24 | secondstaç | yes | pph         | yes | distress     | alive | day   | episiotomy  |
| 2  | firststage | yes | others      | no  |              | alive | day   | cs          |
| 1  | firststage | no  |             | no  |              | alive | day   | SVD         |
| 4  | firststage | no  |             | no  |              | alive | night | SVD         |
| 5  | firststage | no  |             | yes | distress     | alive | night | SVD         |
| 6  | firststage | no  |             | no  |              | alive | night | SVD         |
| 3  | firststage | no  |             | no  |              | alive | day   | SVD         |
| 2  | firststage | no  |             | no  |              | alive | night | SVD         |
| 48 | secondstaç | yes | hypertensic | no  |              | alive | night | SVD         |
| 43 | secondstaç | no  |             | no  |              | alive | night | SVD         |
| 12 | firststage | yes | highdegree  | no  |              | alive | day   | episiotomy  |
| 2  | firststage | yes | highdegree  | no  |              | alive | day   | episiotomy  |
| 6  | firststage | no  |             | yes | physicalinjt | died  | day   | instrument: |
| 8  | firststage | yes | hypertensic | no  |              | alive | night | cs          |
| 10 | firststage | no  |             | yes | others       | died  | day   | instrument: |
| 4  | firststage | yes | hypertensic | no  |              | alive | day   | SVD         |
| 24 | secondstaç | no  |             | no  |              | alive | day   | SVD         |
| 15 | secondstaç | no  |             | no  |              | alive | day   | episiotomy  |
| 2  | firststage | no  |             | no  |              | alive | day   | SVD         |
| 3  | firststage | no  |             | no  |              | alive | day   | cs          |
| 1  | firststage | no  |             | yes | others       | alive | day   | cs          |
| 2  | firststage | no  |             | no  |              | alive | day   | SVD         |
| 4  | firststage | no  |             | no  |              | alive | day   | episiotomy  |
| 1  | firststage | no  |             | no  |              | alive | day   | SVD         |
| 4  | firststage | no  |             | yes | malpresent   | alive | day   | SVD         |
| 3  | firststage | no  |             | no  |              | alive | day   | episiotomy  |
| 2  | firststage | no  |             | no  |              | alive | day   | episiotomy  |
| 7  | firststage | no  |             | no  |              | alive | day   | episiotomy  |
| 1  | firststage | no  |             | yes | distress     | alive | night | cs          |
| 1  | firststage | no  |             | no  |              | alive | night | episiotomy  |
| 6  | firststage | no  |             | no  |              | alive | night | SVD         |
| 12 | firststage | no  |             | no  |              | alive | day   | SVD         |
| 1  | firststage | no  |             | no  |              | alive | day   | SVD         |
| 12 | secondstaç | no  |             | no  |              | alive | night | SVD         |
| 48 | firststage | yes | highdegree  | no  |              | alive | night | episiotomy  |
| 1  | firststage | no  |             | no  |              | alive | day   | SVD         |
| 7  | firststage | yes | others      | no  |              | alive | night | cs          |
| 4  | firststage | yes | others      | yes | physicalinjt | alive | night | cs          |
| 15 | secondstaç | no  |             | no  |              | alive | day   | SVD         |
| 5  | firststage | no  |             | no  |              | alive | day   | SVD         |
| 1  | firststage | no  |             | no  |              | alive | day   | episiotomy  |
| 6  | firststage | no  |             | yes | others       | died  | day   | instrument: |
| 12 | firststage | yes | pph         | no  |              | alive | night | cs          |
| 18 | secondstaç | no  |             | no  |              | alive | day   | cs          |
| 1  | firststage | no  |             | no  |              | alive | day   | SVD         |
| 1  | firststage | no  |             | no  |              | alive | day   | SVD         |
| 1  | firststage | no  |             | no  |              | died  | day   | SVD         |
|    | elective   | yes | hypertensic | no  |              | alive | day   | cs          |
| 2  | firststage | no  |             | no  |              | alive | night | SVD         |

|     |             |     |             |     |              |       |             |             |
|-----|-------------|-----|-------------|-----|--------------|-------|-------------|-------------|
| 8   | secondstage | no  |             | no  | alive        | night | SVD         |             |
| 6   | secondstage | no  |             | no  | alive        | day   | SVD         |             |
| 9   | secondstage | no  |             | no  | alive        | day   | SVD         |             |
| 2   | firststage  | no  |             | no  | alive        | day   | SVD         |             |
| 12  | firststage  | no  |             | no  | alive        | night | SVD         |             |
| 72  | secondstage | no  |             | no  | alive        | day   | instrument: |             |
| 11  | firststage  | no  |             | yes | distress     | alive | day         | cs          |
| 2   | firststage  | no  |             | no  | alive        | night | episiotomy  |             |
|     | elective    | no  |             | no  | alive        | day   | cs          |             |
| 16  | secondstage | yes | pph         | yes | others       | died  | day         | SVD         |
| 6   | firststage  | no  |             | no  | alive        | day   | SVD         |             |
| 13  | secondstage | no  |             | no  | alive        | day   | instrument: |             |
|     | elective    | no  |             | yes | malpresent   | alive | night       | cs          |
| 0.5 | firststage  | no  |             | yes | distress     | alive | night       | cs          |
| 10  | firststage  | no  |             | yes | malpresent   | alive | day         | cs          |
|     | elective    | yes | hypertensic | yes | physicalinjt | died  | day         | SVD         |
|     | elective    | yes | others      | no  |              | alive | day         | cs          |
| 10  | firststage  | no  |             | yes | malpresent   | died  | night       | cs          |
| 24  | firststage  | no  |             | yes | distress     | alive | day         | cs          |
| 16  | firststage  | no  |             | yes | others       | died  | night       | cs          |
|     | elective    | no  |             | yes | others       | died  | day         | SVD         |
|     | elective    | yes | hypertensic | yes | others       | died  | night       | cs          |
| 3   | firststage  | yes | pph         | yes | distress     | died  | night       | SVD         |
| 0.5 | firststage  | no  |             | no  | alive        | night | SVD         |             |
| 1   | secondstage | no  |             | no  | alive        | night | instrument: |             |
| 0.5 | firststage  | no  |             | no  | alive        | day   | SVD         |             |
| 0.7 | firststage  | no  |             | no  | alive        | night | instrument: |             |
| 0.5 | firststage  | no  |             | yes | others       | died  | day         | SVD         |
| 1   | firststage  | no  |             | no  | alive        | night | SVD         |             |
| 10  | firststage  | no  |             | no  | alive        | night | SVD         |             |
| 10  | secondstage | no  |             | no  | alive        | day   | SVD         |             |
| 3   | firststage  | yes | hypertensic | yes | physicalinjt | died  | day         | instrument: |
| 24  | firststage  | yes | pph         | no  |              | alive | day         | episiotomy  |
| 1   | firststage  | no  |             | no  | alive        | day   | SVD         |             |
|     | elective    | no  |             | yes | distress     | died  | night       | cs          |
| 24  | secondstage | yes | others      | yes | others       | died  | night       | cs          |
|     | elective    | yes | pph         | yes | others       | died  | night       | episiotomy  |
| 15  | secondstage | yes | pph         | yes | malpresent   | died  | day         | cs          |
| 16  | secondstage | no  |             | yes | physicalinjt | died  | day         | instrument: |
| 15  | secondstage | yes | pph         | no  |              | died  | day         | SVD         |
| 15  | secondstage | no  |             | yes | malpresent   | died  | day         | cs          |
|     | elective    | yes | hypertensic | yes | others       | alive | night       | cs          |
| 4   | firststage  | yes | hypertensic | no  |              | alive | night       | SVD         |
| 12  | firststage  | no  |             | no  |              | alive | night       | cs          |
| 6   | firststage  | no  |             | yes | others       | alive | night       | cs          |
| 3   | firststage  | no  |             | no  |              | alive | night       | cs          |
| 24  | firststage  | yes | retainedpla | no  |              | alive | day         | episiotomy  |
| 12  | secondstage | no  |             | no  |              | alive | day         | episiotomy  |
| 8   | firststage  | no  |             | no  |              | alive | day         | cs          |
| 6   | secondstage | no  |             | no  |              | alive | day         | cs          |
| 4   | firststage  | no  |             | no  |              | alive | day         | SVD         |
| 11  | secondstage | no  |             | no  |              | alive | day         | SVD         |

|     |             |     |             |     |            |       |       |             |
|-----|-------------|-----|-------------|-----|------------|-------|-------|-------------|
|     | elective    | yes | others      | no  |            | alive | night | cs          |
| 3   | firststage  | yes | others      | no  |            | alive | day   | cs          |
|     | elective    | yes | others      | yes | distress   | alive | night | cs          |
| 2   | firststage  | no  |             | no  |            | alive | day   | episiotomy  |
| 5   | firststage  | no  |             | yes | distress   | alive | night | SVD         |
| 1   | firststage  | no  |             | no  |            | alive | night | SVD         |
| 3   | firststage  | no  |             | no  |            | alive | day   | SVD         |
| 0.5 | firststage  | no  |             | yes | distress   | alive | night | episiotomy  |
| 24  | firststage  | no  |             | no  |            | alive | night | episiotomy  |
| 0.5 | firststage  | no  |             | no  |            | alive | day   | SVD         |
| 2   | secondstage | no  |             | no  |            | alive | night | episiotomy  |
| 1   | firststage  | no  |             | no  |            | alive | day   | episiotomy  |
| 1   | firststage  | no  |             | no  |            | alive | night | SVD         |
| 3   | firststage  | no  |             | no  |            | alive | day   | SVD         |
| 2   | firststage  | no  |             | no  |            | alive | day   | episiotomy  |
|     | firststage  | no  |             | no  |            | alive | day   | SVD         |
| 10  | firststage  | no  |             | no  |            | alive | day   | episiotomy  |
|     | elective    | yes | others      | no  |            | alive | day   | cs          |
| 16  | secondstage | yes | others      | no  |            | alive | day   | cs          |
|     | elective    | no  |             | no  |            | alive | night | cs          |
| 4   | firststage  | no  |             | yes | malpresent | alive | night | cs          |
| 3.5 | firststage  | yes | others      | yes | distress   | alive | night | cs          |
| 18  | secondstage | no  |             | no  |            | alive | day   | SVD         |
| 12  | secondstage | yes | others      | no  |            | alive | night | cs          |
| 6   | firststage  | no  |             | no  |            | alive | day   | SVD         |
|     | elective    | yes | hypertensic | no  |            | died  | night | SVD         |
|     | elective    | no  |             | yes | malpresent | alive | night | cs          |
| 3   | firststage  | yes | hypertensic | no  |            | alive | night | instrument: |
|     | elective    | yes | hypertensic | no  |            | alive | day   | cs          |
| 2   | firststage  | no  |             | no  |            | alive | night | instrument: |
| 2   | firststage  | no  |             | no  |            | alive | day   | instrument: |
| 13  | secondstage | no  |             | yes | distress   | alive | day   | SVD         |
| 1   | firststage  | no  |             | no  |            | alive | night | SVD         |
| 5   | secondstage | no  |             | no  |            | alive | day   | SVD         |
| 2   | firststage  | no  |             | yes | distress   | alive | day   | instrument: |
| 1   | secondstage | no  |             | no  |            | alive | day   | SVD         |
| 1   | firststage  | no  |             | no  |            | alive | day   | SVD         |
| 1   | firststage  | no  |             | no  |            | alive | day   | SVD         |
| 0.5 | firststage  | no  |             | no  |            | alive | night | SVD         |
| 2   | firststage  | yes | pph         | no  |            | alive | night | SVD         |
| 24  | firststage  | no  |             | no  |            | alive | day   | episiotomy  |
| 2   | firststage  | no  |             | no  |            | alive | night | episiotomy  |
| 2   | firststage  | no  |             | yes | distress   | died  | day   | SVD         |
| 3   | firststage  | no  |             | no  |            | alive | day   | SVD         |
| 9   | firststage  | no  |             | no  |            | alive | day   | SVD         |
| 8   | firststage  | no  |             | no  |            | alive | night | SVD         |
| 1   | firststage  | no  |             | yes | others     | alive | day   | SVD         |
| 7   | secondstage | no  |             | no  |            | alive | day   | SVD         |
| 1.5 | firststage  | no  |             | no  |            | alive | night | cs          |
| 4   | firststage  | no  |             | no  |            | alive | day   | cs          |
| 2   | firststage  | no  |             | no  |            | alive | night | cs          |
| 2   | firststage  | no  |             | no  |            | alive | day   | cs          |

|     |             |     |             |     |            |       |             |             |
|-----|-------------|-----|-------------|-----|------------|-------|-------------|-------------|
| 2   | firststage  | no  |             |     | alive      | day   | SVD         |             |
| 8   | secondstage | no  |             |     | alive      | night | SVD         |             |
| 10  | firststage  | no  |             |     | alive      | day   | SVD         |             |
| 3   | firststage  | no  |             |     | alive      | night | SVD         |             |
| 3   | firststage  | no  |             |     | alive      | night | SVD         |             |
| 8   | secondstage | no  |             |     | alive      | day   | SVD         |             |
| 1   | firststage  | no  |             |     | alive      | night | SVD         |             |
| 3   | firststage  | no  |             |     | alive      | night | episiotomy  |             |
| 3   | secondstage | no  |             |     | alive      | day   | SVD         |             |
| 5   | secondstage | no  |             |     | alive      | day   | SVD         |             |
| 6   | firststage  | no  |             |     | alive      | night | SVD         |             |
| 18  | secondstage | yes | others      | yes | distress   | died  | instrument: |             |
| 2   | firststage  | no  |             | no  | alive      | day   | SVD         |             |
| 2.5 | firststage  | no  |             | no  | alive      | day   | SVD         |             |
| 4   | firststage  | no  |             | no  | alive      | day   | SVD         |             |
| 3   | firststage  | no  |             | no  | alive      | day   | SVD         |             |
| 10  | firststage  | yes | pph         | no  | alive      | day   | SVD         |             |
| 15  | secondstage | no  |             | no  | alive      | night | episiotomy  |             |
| 11  | firststage  | no  |             | no  | alive      | day   | SVD         |             |
| 13  | firststage  | no  |             | no  | alive      | day   | SVD         |             |
| 1.5 | firststage  | no  |             | yes | malpresent | alive | cs          |             |
| 1   | firststage  | no  |             | no  | alive      | day   | SVD         |             |
| 2   | firststage  | no  |             | no  | alive      | night | episiotomy  |             |
| 9   | firststage  | no  |             | no  | alive      | night | SVD         |             |
| 1   | firststage  | no  |             | no  | alive      | day   | SVD         |             |
| 7   | firststage  | no  |             | yes | distress   | alive | day         | SVD         |
| 4   | firststage  | yes | hypertensic | no  |            | alive | day         | SVD         |
| 8   | secondstage | no  |             | no  |            | alive | day         | SVD         |
| 14  | secondstage | no  |             | yes | distress   | alive | night       | cs          |
| 10  | secondstage | yes | retainedpla | no  |            | alive | night       | SVD         |
| 13  | secondstage | no  |             | no  |            | alive | night       | SVD         |
| 10  | secondstage | no  |             | no  |            | alive | day         | SVD         |
| 1   | firststage  | no  |             | no  |            | alive | day         | SVD         |
| 15  | secondstage | yes | aph         | yes | malpresent | alive | night       | episiotomy  |
| 2   | firststage  | no  |             | no  |            | alive | day         | SVD         |
| 3   | firststage  | no  |             | no  |            | alive | day         | episiotomy  |
| 5   | firststage  | yes | others      | no  |            | alive | day         | instrument: |
| 10  | firststage  | no  |             | no  |            | alive | day         | SVD         |
| 3   | firststage  | yes | hypertensic | no  |            | alive | night       | cs          |
| 10  | firststage  | yes | others      | yes | malpresent | alive | night       | cs          |
| 10  | secondstage | yes | retainedpla | yes | distress   | died  | night       | instrument: |
| 4   | firststage  | yes | others      | no  |            | alive | night       | cs          |
| 2   | firststage  | no  |             | no  |            | alive | day         | SVD         |
| 12  | firststage  | yes | aph         | no  |            | alive | night       | cs          |
| 1   | firststage  | no  |             | no  |            | alive | day         | SVD         |
| 10  | firststage  | no  |             | no  |            | alive | day         | SVD         |
| 24  | firststage  | yes | others      | yes | distress   | alive | night       | cs          |
| 1   | firststage  | no  |             | no  |            | alive | day         | SVD         |
| 3   | firststage  | no  |             | no  |            | alive | night       | SVD         |
| 2   | firststage  | no  |             | no  |            | alive | day         | SVD         |
| 2   | firststage  | no  |             | yes | malpresent | alive | night       | cs          |
| 24  | secondstage | yes | others      | no  |            | alive | night       | episiotomy  |

|     |             |     |             |     |            |       |       |             |
|-----|-------------|-----|-------------|-----|------------|-------|-------|-------------|
| 15  | secondstage | yes | others      | no  |            | alive | night | episiotomy  |
| 10  | firststage  | no  |             | no  |            | alive | day   | SVD         |
| 5   | firststage  | no  |             | no  |            | alive | night | episiotomy  |
| 5   | firststage  | no  |             | no  |            | died  | night | instrument: |
| 10  | secondstage | yes | hypertensio | no  |            | alive | day   | cs          |
| 1   | firststage  | no  |             | no  |            | alive | day   | SVD         |
| 26  | secondstage | yes | hypertensio | no  |            | alive | day   | SVD         |
| 9   | firststage  | yes | pph         | no  |            | died  | night | SVD         |
| 10  | firststage  | no  |             | yes | malpresent | alive | night | cs          |
| 24  | firststage  | yes | others      | yes | others     | alive | night | cs          |
| 2   | firststage  | no  |             | yes | distress   | alive | day   | episiotomy  |
| 3   | firststage  | no  |             | yes | others     | alive | night | SVD         |
| 13  | secondstage | yes | others      | no  |            | alive | night | cs          |
| 11  | firststage  | no  |             | no  |            | died  | night | episiotomy  |
| 5   | firststage  | no  |             | yes | malpresent | alive | night | cs          |
| 1   | firststage  | no  |             | no  |            | alive | day   | SVD         |
| 16  | secondstage | yes | others      | no  |            | alive | night | cs          |
| 15  | firststage  | yes | others      | yes | distress   | alive | night | cs          |
| 20  | secondstage | yes | hypertensio | no  |            | alive | night | cs          |
| 2   | firststage  | no  |             | no  |            | alive | night | episiotomy  |
| 11  | firststage  | no  |             | yes | distress   | alive | day   | instrument: |
| 5   | firststage  | yes | others      | yes | malpresent | alive | day   | cs          |
| 10  | firststage  | yes | others      | no  |            | alive | night | episiotomy  |
| 13  | firststage  | yes | others      | no  |            | alive | night | instrument: |
|     | elective    | no  |             | no  |            | alive | night | cs          |
| 2   | firststage  | no  |             | no  |            | alive | day   | SVD         |
| 24  | secondstage | yes | others      | no  |            | alive | day   | instrument: |
| 12  | firststage  | no  |             | no  |            | alive | night | instrument: |
| 7   | firststage  | yes | aph         | no  |            | alive | night | SVD         |
| 10  | firststage  | no  |             | yes | distress   | alive | day   | cs          |
| 3   | firststage  | no  |             | no  |            | alive | day   | SVD         |
| 4   | firststage  | no  |             | no  |            | alive | day   | SVD         |
| 1   | firststage  | no  |             | no  |            | alive | night | SVD         |
| 15  | firststage  | yes | others      | no  |            | alive | night | cs          |
| 12  | firststage  | no  |             | yes | distress   | alive | day   | cs          |
| 4   | firststage  | no  |             | no  |            | alive | day   | SVD         |
| 10  | firststage  | yes | others      | no  |            | alive | night | instrument: |
| 2   | firststage  | yes | others      | no  |            | alive | day   | SVD         |
| 1   | firststage  | no  |             | no  |            | alive | day   | SVD         |
| 2   | firststage  | no  |             | no  |            | alive | day   | SVD         |
| 17  | secondstage | yes | pph         | no  |            | alive | night | cs          |
| 2   | firststage  | no  |             | no  |            | alive | night | episiotomy  |
| 5   | firststage  | no  |             | no  |            | alive | day   | SVD         |
| 8   | firststage  | no  |             | no  |            | died  | day   | SVD         |
| 0.5 | firststage  | no  |             | no  |            | alive | day   | SVD         |
| 1   | firststage  | no  |             | no  |            | alive | day   | episiotomy  |
| 0.5 | firststage  | no  |             | no  |            | alive | day   | SVD         |
| 4   | firststage  | no  |             | no  |            | alive | day   | SVD         |
| 2   | secondstage | no  |             | no  |            | alive | day   | SVD         |
| 1   | firststage  | no  |             | no  |            | alive | day   | SVD         |
| 2   | firststage  | no  |             | no  |            | alive | day   | SVD         |
| 0.5 | firststage  | no  |             | no  |            | alive | night | SVD         |

|     |             |     |             |     |            |       |             |             |
|-----|-------------|-----|-------------|-----|------------|-------|-------------|-------------|
| 3   | firststage  | no  |             | no  | alive      | day   | SVD         |             |
| 4   | firststage  | no  |             | no  | alive      | day   | SVD         |             |
| 4   | firststage  | no  |             | no  | alive      | night | SVD         |             |
| 5   | firststage  | no  |             | no  | alive      | night | SVD         |             |
| 2   | firststage  | no  |             | no  | alive      | day   | SVD         |             |
| 4   | firststage  | no  |             | yes | distress   | alive | day         | SVD         |
| 6   | firststage  | no  |             | no  | alive      | night | episiotomy  |             |
| 3   | firststage  | no  |             | no  | alive      | day   | SVD         |             |
| 4   | firststage  | no  |             | no  | alive      | day   | SVD         |             |
| 5   | firststage  | no  |             | yes | others     | died  | day         | SVD         |
| 1   | firststage  | no  |             | no  | alive      | night | SVD         |             |
| 1   | firststage  | no  |             | no  | alive      | day   | SVD         |             |
| 2   | firststage  | no  |             | no  | alive      | day   | SVD         |             |
| 5   | firststage  | no  |             | no  | alive      | day   | SVD         |             |
| 2   | firststage  | no  |             | no  | alive      | day   | SVD         |             |
| 2   | firststage  | no  |             | no  | alive      | night | episiotomy  |             |
| 2   | firststage  | no  |             | no  | alive      | day   | SVD         |             |
| 1   | firststage  | no  |             | no  | alive      | day   | SVD         |             |
| 2   | firststage  | no  |             | no  | alive      | night | episiotomy  |             |
| 2   | firststage  | no  |             | no  | alive      | day   | SVD         |             |
| 0.5 | firststage  | no  |             | no  | alive      | day   | SVD         |             |
| 0.5 | firststage  | yes | others      | no  | alive      | day   | SVD         |             |
| 0.5 | firststage  | no  |             | no  | alive      | day   | SVD         |             |
| 0.5 | firststage  | no  |             | no  | alive      | day   | episiotomy  |             |
| 5   | firststage  | no  |             | no  | alive      | night | SVD         |             |
| 6   | firststage  | no  |             | no  | alive      | day   | SVD         |             |
| 1   | firststage  | no  |             | no  | alive      | night | SVD         |             |
| 6   | firststage  | no  |             | no  | alive      | day   | SVD         |             |
| 5   | firststage  | no  |             | no  | alive      | night | SVD         |             |
| 2   | firststage  | no  |             | no  | alive      | night | SVD         |             |
| 2   | firststage  | no  |             | no  | alive      | day   | SVD         |             |
| 1   | firststage  | no  |             | yes | distress   | alive | night       | SVD         |
| 1   | firststage  | no  |             | no  | alive      | day   | SVD         |             |
| 4   | firststage  | yes | others      | no  | alive      | night | instrument: |             |
| 4   | firststage  | yes | hypertensio | no  | alive      | night | cs          |             |
| 2   | firststage  | no  |             | no  | alive      | day   | SVD         |             |
| 2   | firststage  | no  |             | no  | alive      | day   | SVD         |             |
| 3   | firststage  | no  |             | no  | alive      | day   | SVD         |             |
| 2   | firststage  | no  |             | no  | alive      | day   | episiotomy  |             |
| 4   | firststage  | no  |             | no  | alive      | day   | SVD         |             |
| 0.5 | firststage  | no  |             | yes | others     | alive | night       | episiotomy  |
| 8   | firststage  | yes | others      | no  | alive      | night | instrument: |             |
| 6   | firststage  | yes | others      | yes | distress   | alive | night       | cs          |
| 2   | firststage  | no  |             | yes | distress   | alive | night       | SVD         |
| 3   | firststage  | yes | others      | yes | others     | alive | night       | cs          |
| 4   | firststage  | yes | hypertensio | no  | alive      | night | cs          |             |
| 8   | secondstage | yes | others      | no  | alive      | night | instrument: |             |
| 1   | firststage  | no  |             | no  | alive      | day   | SVD         |             |
| 1   | firststage  | no  |             | no  | alive      | day   | SVD         |             |
| 10  | secondstage | yes | others      | no  | alive      | night | instrument: |             |
| 1   | firststage  | no  |             | no  | alive      | night | SVD         |             |
| 5   | firststage  | no  |             | yes | malpresent | died  | night       | instrument: |

|     |            |     |             |     |          |       |       |             |
|-----|------------|-----|-------------|-----|----------|-------|-------|-------------|
| 2   | firststage | yes | pph         | no  |          | alive | night | SVD         |
| 2   | firststage | yes | others      | yes | others   | alive | day   | SVD         |
| 12  | secondstaç | yes | others      | no  |          | alive | night | episiotomy  |
| 24  | secondstaç | yes | others      | yes | distress | died  | night | instrument: |
| 6   | firststage | yes | others      | no  |          | alive | night | SVD         |
| 10  | secondstaç | yes | aph         | yes | others   | died  | night | instrument: |
| 1   | firststage | no  |             | no  |          | alive | night | SVD         |
| 2   | firststage | yes | hypertensic | no  |          | alive | night | cs          |
| 2   | firststage | no  |             | no  |          | alive | night | SVD         |
| 3   | firststage | yes | hypertensic | no  |          | alive | night | instrument: |
| 4   | firststage | yes | others      | no  |          | died  | night | instrument: |
| 15  | secondstaç | yes | others      | no  |          | alive | night | cs          |
| 0.5 | firststage | no  |             | no  |          | alive | night | SVD         |
| 0.5 | firststage | no  |             | no  |          | alive | night | SVD         |
| 14  | firststage | no  |             | no  |          | alive | night | cs          |
| 2   | firststage | no  |             | no  |          | alive | day   | SVD         |
| 2   | firststage | no  |             | no  |          | alive | day   | SVD         |
| 1   | firststage | no  |             | no  |          | alive | day   | SVD         |
| 3   | firststage | no  |             | no  |          | alive | day   | SVD         |
| 2   | firststage | no  |             | no  |          | alive | day   | SVD         |
| 1   | firststage | no  |             | no  |          | alive | day   | SVD         |
| 0.5 | firststage | no  |             | no  |          | alive | day   | SVD         |
| 2   | firststage | no  |             | no  |          | alive | day   | SVD         |
| 6   | firststage | yes | hypertensic | no  |          | alive | night | episiotomy  |
| 2   | firststage | no  |             | no  |          | alive | night | SVD         |
| 1   | firststage | no  |             | no  |          | alive | night | episiotomy  |



| Q313 | Q401           | Q402   | Q403    | Q404 | Q405 | Q406 | Q501   | Q502 |
|------|----------------|--------|---------|------|------|------|--------|------|
|      | 2 hospital     | male   | midwife |      | 6    | 8    | 33 no  | yes  |
|      | 2 hospital     | male   | midwife |      | 4    | 8    | 28 no  | yes  |
|      | 1 hospital     | male   | midwife |      | 4    | 8    | 30 yes | yes  |
|      | 4 hospital     | male   | midwife |      | 2    | 24   | 30 no  | yes  |
|      | 1 hospital     | male   | midwife |      | 5    | 8    | 30 no  | yes  |
|      | 1 hospital     | male   | midwife |      | 3    | 8    | 28 no  | yes  |
|      | 1 hospital     | male   | midwife |      | 4    | 8    | 29 no  | yes  |
|      | 1 hospital     | female | midwife |      | 3    | 8    | 28 no  | yes  |
|      | 1 hospital     | male   | doctor  |      | 6    | 24   | 38 yes | yes  |
|      | 1 hospital     | male   | midwife |      | 4    | 8    | 28 no  | yes  |
|      | 2 hospital     | male   | midwife |      | 3    | 8    | 29 no  | yes  |
|      | 1 hospital     | male   | doctor  |      | 3    | 24   | 29 no  | yes  |
|      | 1 hospital     | male   | midwife |      | 3    | 8    | 28 no  | yes  |
|      | 1 hospital     | male   | doctor  |      | 1    | 8    | 30 no  | yes  |
|      | 1 hospital     | male   | midwife |      | 3    | 24   | 30 no  | yes  |
|      | 1 hospital     | male   | midwife |      | 5    | 8    | 30 yes | yes  |
|      | 1 hospital     | male   | doctor  |      | 3    | 8    | 28 no  | yes  |
|      | 1 hospital     | female | midwife |      | 3    | 8    | 27 no  | yes  |
|      | 2 hospital     | male   | doctor  |      | 3    | 24   | 30 yes | yes  |
|      | 3 healthcentre | female | midwife |      | 4    | 8    | 26 no  | yes  |
|      | 1 hospital     | male   | midwife |      | 2    | 8    | 30 no  | yes  |
|      | 6 hospital     | male   | doctor  |      | 3    | 24   | 27 no  | yes  |
|      | 2 hospital     | female | doctor  |      | 3    | 24   | 28 no  | yes  |
|      | 2 hospital     | male   | doctor  |      | 2    | 24   | 30 no  | yes  |
|      | 1 hospital     | female | midwife |      | 3    | 8    | 26 no  | yes  |
|      | 1 hospital     | male   | midwife |      | 4    | 8    | 29 no  | yes  |
|      | 1 healthcentre | female | midwife |      | 2    | 8    | 27 yes | no   |
|      | 1 hospital     | male   | doctor  |      | 6    | 12   | 30 yes | yes  |
|      | 2 hospital     | male   | midwife |      | 3    | 8    | 28 no  | yes  |
|      | 2 hospital     | female | midwife |      | 3    | 8    | 27 no  | yes  |
|      | 1 hospital     | male   | midwife |      | 4    | 8    | 31 yes | yes  |
|      | 1 hospital     | female | midwife |      | 5    | 8    | 31 yes | yes  |
|      | 2 hospital     | male   | midwife |      | 1    | 8    | 30 no  | yes  |
|      | 2 hospital     | male   | midwife |      | 3    | 8    | 28 no  | yes  |
|      | 2 hospital     | male   | midwife |      | 4    | 8    | 28 no  | yes  |
|      | 2 hospital     | male   | doctor  |      | 2    | 24   | 28 no  | yes  |
|      | 2 hospital     | male   | doctor  |      | 3    | 8    | 30 no  | yes  |
|      | 1 hospital     | male   | doctor  |      | 2    | 24   | 28 no  | yes  |
|      | 1 hospital     | male   | midwife |      | 3    | 8    | 28 no  | yes  |
|      | 4 hospital     | male   | doctor  |      | 2    | 24   | 29 no  | yes  |
|      | 3 hospital     | male   | midwife |      | 1    | 24   | 29 no  | yes  |
|      | 1 hospital     | female | midwife |      | 5    | 8    | 27 yes | yes  |
|      | 1 hospital     | male   | doctor  |      | 2    | 8    | 27 no  | yes  |
|      | 3 hospital     | male   | doctor  |      | 1    | 24   | 28 no  | no   |
|      | 3 hospital     | male   | doctor  |      | 2    | 8    | 32 no  | yes  |
|      | 5 hospital     | male   | doctor  |      | 3    | 24   | 32 no  | yes  |
|      | 2 hospital     | male   | midwife |      | 3    | 8    | 30 no  | no   |
|      | 1 hospital     | female | midwife |      | 12   | 8    | 45 no  | no   |
|      | 1 hospital     | female | midwife |      | 6    | 8    | 30 no  | yes  |
|      | 3 hospital     | male   | doctor  |      | 1    | 24   | 28 no  | yes  |
|      | 2 healthcentre | male   | others  |      | 4    | 24   | 36 no  | yes  |

|   |              |        |         |    |    |    |     |     |
|---|--------------|--------|---------|----|----|----|-----|-----|
| 1 | hospital     | male   | midwife | 6  | 24 | 32 | no  | yes |
| 4 | hospital     | male   | midwife | 6  | 24 | 33 | no  | yes |
| 3 | hospital     | male   | doctor  | 12 | 24 | 45 | yes | yes |
| 2 | hospital     | male   | midwife | 4  | 8  | 29 | no  | yes |
| 1 | hospital     | male   | doctor  | 6  | 8  | 35 | no  | yes |
| 1 | healthcentre | female | midwife | 6  | 15 | 33 | no  | yes |
| 1 | healthcentre | male   | midwife | 1  | 17 | 37 | yes | yes |
| 1 | healthcentre | male   | midwife | 2  | 17 | 39 | yes | yes |
| 1 | healthcentre | male   | midwife | 4  | 17 | 37 | yes | yes |
| 1 | healthcentre | female | midwife | 2  | 17 | 24 | yes | yes |
| 1 | healthcentre | female | midwife | 2  | 17 | 24 | yes | yes |
| 1 | healthcentre | male   | midwife | 4  | 17 | 37 | yes | yes |
| 1 | healthcentre | female | midwife | 10 | 12 | 30 | no  | yes |
| 1 | hospital     | male   | midwife | 4  | 8  | 32 | no  | yes |
| 2 | hospital     | male   | midwife | 3  | 16 | 28 | no  | yes |
| 2 | hospital     | male   | doctor  | 3  | 24 | 32 | no  | yes |
| 2 | hospital     | male   | doctor  | 3  | 12 | 32 | no  | no  |
| 3 | hospital     | male   | midwife | 3  | 8  | 30 | no  | yes |
| 3 | hospital     | male   | doctor  | 2  | 24 | 30 | no  | yes |
| 2 | hospital     | male   | midwife | 3  | 8  | 33 | yes | yes |
| 1 | hospital     | female | midwife | 3  | 8  | 36 | no  | yes |
| 1 | hospital     | female | doctor  | 8  | 8  | 33 | no  | yes |
| 1 | hospital     | male   | doctor  | 5  | 24 | 36 | no  | yes |
| 1 | hospital     | male   | doctor  | 7  | 24 | 38 | no  | yes |
| 1 | hospital     | female | midwife | 4  | 8  | 28 | no  | yes |
| 1 | hospital     | female | midwife | 4  | 8  | 28 | no  | yes |
| 1 | hospital     | female | midwife | 8  | 12 | 35 | yes | yes |
| 1 | hospital     | female | midwife | 8  | 8  | 35 | no  | yes |
| 1 | hospital     | female | midwife | 2  | 8  | 24 | no  | yes |
| 3 | hospital     | female | midwife | 2  | 8  | 24 | no  | yes |
| 1 | hospital     | female | doctor  | 5  | 8  | 29 | yes | yes |
| 5 | hospital     | male   | doctor  | 7  | 18 | 36 | no  | yes |
| 1 | hospital     | female | midwife | 8  | 8  | 28 | no  | yes |
| 3 | hospital     | female | midwife | 7  | 8  | 28 | no  | yes |
| 2 | hospital     | female | midwife | 2  | 8  | 24 | no  | yes |
| 2 | hospital     | female | midwife | 5  | 8  | 32 | no  | yes |
| 2 | hospital     | female | midwife | 2  | 8  | 24 | no  | yes |
| 9 | hospital     | female | doctor  | 8  | 24 | 35 | no  | yes |
| 2 | hospital     | male   | midwife | 3  | 8  | 26 | no  | yes |
| 2 | hospital     | male   | midwife | 2  | 8  | 27 | no  | yes |
| 3 | hospital     | male   | midwife | 3  | 8  | 29 | no  | yes |
| 2 | hospital     | male   | doctor  | 3  | 8  | 33 | no  | yes |
| 1 | hospital     | male   | others  | 3  | 8  | 26 | yes | yes |
| 1 | hospital     | female | doctor  | 4  | 8  | 30 | no  | yes |
| 1 | hospital     | male   | doctor  | 11 | 24 | 38 | no  | yes |
| 3 | hospital     | male   | doctor  | 3  | 8  | 30 | no  | yes |
| 2 | hospital     | female | doctor  | 2  | 24 | 29 | no  | yes |
| 1 | hospital     | male   | midwife | 3  | 8  | 28 | yes | yes |
| 1 | hospital     | male   | midwife | 5  | 8  | 35 | no  | yes |
| 1 | hospital     | male   | midwife | 1  | 8  | 26 | no  | yes |
| 5 | hospital     | male   | doctor  | 3  | 24 | 30 | no  | yes |
| 1 | hospital     | male   | midwife | 2  | 24 | 27 | no  | yes |

|             |        |         |    |    |        |     |
|-------------|--------|---------|----|----|--------|-----|
| 1 hospital  | female | midwife | 3  | 8  | 28 no  | yes |
| 1 hospital  | male   | midwife | 5  | 8  | 32 no  | yes |
| 1 hospital  | male   | midwife | 3  | 8  | 28 no  | yes |
| 1 hospital  | female | midwife | 6  | 8  | 35 no  | yes |
| 2 hospital  | male   | midwife | 3  | 8  | 28 no  | yes |
| 3 hospital  | male   | midwife | 5  | 8  | 28 no  | yes |
| 3 hospital  | male   | doctor  | 8  | 24 | 39 yes | yes |
| 9 hospital  | male   | midwife | 4  | 8  | 29 no  | yes |
| 3 hospital  | male   | doctor  | 7  | 24 | 36 no  | yes |
| 2 hospital  | male   | midwife | 5  | 8  | 29 no  | no  |
| 1 hospital  | female | midwife | 4  | 8  | 28 no  | yes |
| 1 hospital  | female | doctor  | 4  | 8  | 28 no  | yes |
| 45 hospital | male   | doctor  | 10 | 24 | 45 yes | yes |
| 3 hospital  | male   | doctor  | 4  | 24 | 32 no  | yes |
| 3 hospital  | male   | doctor  | 10 | 24 | 45 no  | yes |
| 20 hospital | male   | midwife | 4  | 8  | 28 no  | yes |
| 8 hospital  | male   | doctor  | 4  | 24 | 32 no  | yes |
| 5 hospital  | male   | midwife | 10 | 24 | 45 no  | yes |
| 3 hospital  | male   | midwife | 3  | 24 | 29 no  | yes |
| 5 hospital  | female | doctor  | 3  | 24 | 31 no  | yes |
| 4 hospital  | male   | doctor  | 4  | 24 | 32 yes | yes |
| 6 hospital  | male   | doctor  | 4  | 24 | 33 no  | yes |
| 6 hospital  | male   | midwife | 4  | 8  | 28 no  | yes |
| 1 hospital  | male   | doctor  | 8  | 8  | 32 no  | yes |
| 2 hospital  | female | doctor  | 8  | 12 | 35 no  | yes |
| 1 hospital  | female | midwife | 4  | 8  | 32 yes | yes |
| 2 hospital  | male   | doctor  | 10 | 18 | 39 no  | yes |
| 1 hospital  | male   | midwife | 7  | 8  | 35 no  | yes |
| 1 hospital  | male   | doctor  | 1  | 12 | 35 no  | yes |
| 1 hospital  | male   | midwife | 7  | 8  | 29 no  | yes |
| 1 hospital  | female | midwife | 4  | 8  | 29 no  | yes |
| 2 hospital  | male   | midwife | 5  | 12 | 29 no  | yes |
| 3 hospital  | female | midwife | 3  | 12 | 24 no  | yes |
| 1 hospital  | male   | doctor  | 2  | 8  | 30 no  | yes |
| 4 hospital  | male   | midwife | 6  | 24 | 35 no  | yes |
| 3 hospital  | male   | doctor  | 5  | 24 | 35 no  | yes |
| 3 hospital  | male   | midwife | 6  | 24 | 35 no  | yes |
| 5 hospital  | male   | doctor  | 4  | 24 | 29 no  | yes |
| 2 hospital  | male   | doctor  | 4  | 24 | 35 no  | yes |
| 1 hospital  | male   | midwife | 4  | 8  | 28 no  | yes |
| 3 hospital  | female | doctor  | 3  | 24 | 28 no  | yes |
| 5 hospital  | male   | doctor  | 4  | 24 | 29 no  | yes |
| 2 hospital  | female | midwife | 5  | 8  | 32 no  | yes |
| 2 hospital  | female | doctor  | 2  | 24 | 30 no  | yes |
| 2 hospital  | male   | doctor  | 3  | 24 | 28 no  | yes |
| 2 hospital  | male   | doctor  | 2  | 24 | 29 no  | yes |
| 1 hospital  | female | midwife | 7  | 8  | 28 yes | yes |
| 2 hospital  | female | doctor  | 3  | 12 | 28 yes | yes |
| 3 hospital  | male   | doctor  | 5  | 12 | 35 yes | yes |
| 2 hospital  | male   | doctor  | 6  | 8  | 35 yes | yes |
| 2 hospital  | male   | midwife | 5  | 8  | 29 yes | yes |
| 2 hospital  | male   | midwife | 5  | 8  | 30 no  | yes |

|    |              |        |              |    |    |    |     |     |
|----|--------------|--------|--------------|----|----|----|-----|-----|
| 4  | hospital     | male   | midwife      | 3  | 24 | 29 | yes | yes |
| 4  | hospital     | male   | midwife      | 6  | 24 | 35 | no  | yes |
| 3  | hospital     | male   | doctor       | 6  | 24 | 32 | no  | yes |
| 2  | healthcentre | male   | midwife      | 6  | 15 | 28 | yes | yes |
| 1  | healthcentre | female | midwife      | 3  | 15 | 27 | yes | yes |
| 2  | healthcentre | female | midwife      | 5  | 15 | 29 | no  | yes |
| 2  | healthcentre | female | midwife      | 5  | 15 | 29 | yes | yes |
| 1  | healthcentre | female | midwife      | 4  | 18 | 28 | no  | yes |
| 1  | healthcentre | male   | midwife      | 7  | 8  | 28 | yes | yes |
| 1  | healthcentre | male   | midwife      | 7  | 8  | 28 | no  | yes |
| 1  | healthcentre | female | midwife      | 4  | 12 | 27 | yes | yes |
| 1  | hospital     | female | midwife      | 10 | 8  | 32 | no  | yes |
| 1  | healthcentre | male   | midwife      | 7  | 8  | 28 | yes | yes |
| 1  | healthcentre | male   | midwife      | 7  | 8  | 28 | yes | yes |
| 1  | hospital     | male   | midwife      | 5  | 8  | 25 | no  | yes |
| 3  | hospital     | male   | midwife      | 4  | 8  | 28 | no  | yes |
| 1  | hospital     | male   | midwife      | 4  | 8  | 28 | no  | yes |
| 4  | hospital     | male   | doctor       | 4  | 24 | 30 | no  | yes |
| 4  | hospital     | female | doctor       | 3  | 24 | 28 | no  | yes |
| 3  | hospital     | female | doctor       | 3  | 24 | 29 | no  | yes |
| 3  | hospital     | male   | doctor       | 2  | 24 | 34 | no  | yes |
| 3  | hospital     | female | doctor       | 3  | 24 | 28 | no  | yes |
| 2  | hospital     | male   | midwife      | 5  | 12 | 28 | no  | yes |
| 5  | hospital     | male   | doctor       | 3  | 24 | 32 | no  | yes |
| 2  | hospital     | male   | doctor       | 2  | 24 | 35 | no  | yes |
| 3  | hospital     | male   | doctor       | 2  | 12 | 35 | no  | yes |
| 3  | hospital     | female | doctor       | 3  | 24 | 29 | no  | yes |
| 6  | hospital     | male   | doctor       | 3  | 24 | 31 | no  | yes |
| 11 | hospital     | female | doctor       | 3  | 24 | 29 | no  | yes |
| 1  | hospital     | male   | midwife      | 4  | 8  | 28 | yes | yes |
| 1  | hospital     | male   | midwife      | 3  | 8  | 26 | yes | yes |
| 10 | hospital     | male   | midwife      | 8  | 8  | 30 | no  | yes |
| 1  | hospital     | female | midwife      | 6  | 8  | 28 | no  | yes |
| 1  | hospital     | female | midwife      | 6  | 8  | 28 | yes | yes |
| 2  | hospital     | male   | healthoffice | 6  | 24 | 37 | no  | yes |
| 1  | healthcentre | female | midwife      | 6  | 15 | 30 | no  | yes |
| 1  | healthcentre | female | midwife      | 6  | 15 | 30 | no  | yes |
| 1  | healthcentre | female | midwife      | 8  | 15 | 32 | no  | yes |
| 1  | healthcentre | female | midwife      | 8  | 15 | 32 | no  | yes |
| 1  | healthcentre | female | midwife      | 6  | 15 | 30 | yes | yes |
| 1  | healthcentre | female | midwife      | 8  | 15 | 32 | yes | yes |
| 1  | healthcentre | female | midwife      | 6  | 8  | 28 | no  | yes |
| 2  | healthcentre | male   | midwife      | 3  | 8  | 28 | no  | yes |
| 2  | healthcentre | female | midwife      | 3  | 15 | 28 | yes | yes |
| 1  | hospital     | female | midwife      | 5  | 8  | 26 | yes | yes |
| 1  | hospital     | female | midwife      | 6  | 15 | 28 | yes | yes |
| 1  | hospital     | male   | midwife      | 5  | 10 | 26 | no  | yes |
| 1  | hospital     | female | midwife      | 8  | 24 | 26 | no  | yes |
| 5  | hospital     | male   | others       | 6  | 24 | 32 | no  | yes |
| 5  | hospital     | male   | others       | 6  | 24 | 32 | yes | yes |
| 4  | hospital     | male   | others       | 4  | 24 | 32 | yes | yes |
| 9  | hospital     | male   | others       | 6  | 24 | 32 | yes | yes |

|             |        |         |   |    |        |     |
|-------------|--------|---------|---|----|--------|-----|
| 1 hospital  | male   | midwife | 8 | 17 | 27 no  | yes |
| 1 hospital  | male   | midwife | 3 | 8  | 28 no  | yes |
| 1 hospital  | female | midwife | 5 | 8  | 25 no  | yes |
| 1 hospital  | female | midwife | 5 | 8  | 25 no  | yes |
| 1 hospital  | male   | midwife | 5 | 8  | 25 no  | no  |
| 1 hospital  | female | midwife | 4 | 8  | 28 yes | yes |
| 9 hospital  | female | midwife | 4 | 8  | 28 yes | yes |
| 1 hospital  | male   | midwife | 3 | 8  | 26 yes | yes |
| 1 hospital  | male   | midwife | 3 | 8  | 26 no  | yes |
| 1 hospital  | female | midwife | 3 | 8  | 26 yes | yes |
| 1 hospital  | male   | midwife | 4 | 14 | 29 no  | yes |
| 2 hospital  | male   | midwife | 4 | 24 | 30 no  | yes |
| 1 hospital  | female | midwife | 5 | 8  | 28 yes | yes |
| 1 hospital  | female | midwife | 4 | 8  | 29 no  | yes |
| 1 hospital  | female | midwife | 3 | 8  | 27 no  | yes |
| 1 hospital  | male   | midwife | 3 | 8  | 28 no  | yes |
| 1 hospital  | male   | midwife | 6 | 8  | 32 no  | yes |
| 7 hospital  | male   | midwife | 3 | 24 | 29 no  | yes |
| 1 hospital  | female | midwife | 5 | 8  | 28 yes | yes |
| 2 hospital  | female | midwife | 3 | 8  | 27 yes | yes |
| 3 hospital  | female | doctor  | 3 | 8  | 29 no  | yes |
| 3 hospital  | female | midwife | 3 | 8  | 27 yes | yes |
| 4 hospital  | female | midwife | 3 | 8  | 27 yes | yes |
| 8 hospital  | male   | midwife | 4 | 8  | 28 yes | yes |
| 1 hospital  | male   | midwife | 6 | 8  | 32 no  | yes |
| 1 hospital  | male   | midwife | 4 | 8  | 28 no  | yes |
| 12 hospital | female | midwife | 3 | 8  | 29 no  | no  |
| 2 hospital  | male   | midwife | 3 | 8  | 30 no  | no  |
| 4 hospital  | female | doctor  | 6 | 12 | 34 yes | yes |
| 4 hospital  | female | midwife | 4 | 8  | 27 yes | yes |
| 3 hospital  | male   | midwife | 4 | 8  | 27 no  | yes |
| 2 hospital  | male   | midwife | 3 | 8  | 28 yes | no  |
| 1 hospital  | male   | midwife | 2 | 8  | 27 no  | yes |
| 2 hospital  | male   | doctor  | 6 | 24 | 32 no  | yes |
| 1 hospital  | female | midwife | 2 | 8  | 25 no  | yes |
| 2 hospital  | male   | midwife | 2 | 8  | 25 no  | yes |
| 1 hospital  | male   | midwife | 2 | 8  | 25 no  | yes |
| 2 hospital  | female | midwife | 2 | 8  | 25 no  | yes |
| 3 hospital  | female | doctor  | 2 | 24 | 25 no  | yes |
| 4 hospital  | male   | doctor  | 6 | 24 | 31 no  | yes |
| 2 hospital  | male   | doctor  | 2 | 12 | 29 no  | yes |
| 4 hospital  | male   | doctor  | 3 | 24 | 29 no  | yes |
| 1 hospital  | female | midwife | 5 | 8  | 28 no  | yes |
| 4 hospital  | male   | doctor  | 2 | 24 | 29 no  | yes |
| 1 hospital  | male   | midwife | 3 | 8  | 28 no  | yes |
| 2 hospital  | female | midwife | 5 | 8  | 28 no  | yes |
| 7 hospital  | female | doctor  | 3 | 24 | 29 no  | yes |
| 1 hospital  | female | midwife | 5 | 8  | 28 no  | yes |
| 1 hospital  | male   | doctor  | 2 | 24 | 28 no  | yes |
| 1 hospital  | female | midwife | 2 | 8  | 25 yes | yes |
| 6 hospital  | male   | doctor  | 4 | 24 | 32 no  | yes |
| 2 hospital  | male   | doctor  | 4 | 24 | 32 no  | yes |

|   |              |        |         |   |    |    |     |     |
|---|--------------|--------|---------|---|----|----|-----|-----|
| 2 | hospital     | male   | doctor  | 3 | 24 | 30 | no  | yes |
| 1 | hospital     | female | midwife | 2 | 8  | 25 | no  | yes |
| 2 | hospital     | female | midwife | 5 | 8  | 29 | no  | yes |
| 2 | hospital     | male   | doctor  | 4 | 24 | 32 | no  | yes |
| 8 | hospital     | male   | doctor  | 4 | 24 | 32 | no  | yes |
| 1 | hospital     | female | midwife | 5 | 8  | 28 | yes | yes |
| 5 | hospital     | male   | doctor  | 8 | 24 | 36 | no  | yes |
| 2 | hospital     | female | midwife | 5 | 8  | 28 | yes | yes |
| 7 | hospital     | male   | doctor  | 6 | 24 | 34 | no  | yes |
| 5 | hospital     | male   | doctor  | 6 | 24 | 34 | no  | yes |
| 2 | hospital     | female | midwife | 8 | 8  | 33 | no  | yes |
| 2 | hospital     | female | midwife | 2 | 8  | 25 | no  | yes |
| 8 | hospital     | female | doctor  | 8 | 24 | 34 | no  | yes |
| 2 | hospital     | female | midwife | 5 | 8  | 28 | no  | yes |
| 6 | hospital     | male   | doctor  | 8 | 24 | 34 | no  | yes |
| 1 | hospital     | male   | midwife | 4 | 8  | 29 | no  | yes |
| 6 | hospital     | male   | doctor  | 8 | 18 | 34 | no  | yes |
| 4 | hospital     | male   | doctor  | 6 | 24 | 32 | no  | no  |
| 6 | hospital     | female | doctor  | 6 | 12 | 32 | no  | yes |
| 2 | hospital     | female | midwife | 5 | 8  | 28 | no  | yes |
| 2 | hospital     | male   | midwife | 4 | 12 | 28 | no  | yes |
| 4 | hospital     | male   | doctor  | 7 | 24 | 32 | no  | yes |
| 2 | hospital     | male   | midwife | 6 | 8  | 30 | no  | yes |
| 2 | hospital     | male   | doctor  | 4 | 24 | 28 | no  | yes |
| 5 | hospital     | male   | doctor  | 4 | 24 | 30 | no  | yes |
| 1 | hospital     | female | midwife | 5 | 8  | 29 | no  | yes |
| 2 | hospital     | female | midwife | 5 | 8  | 29 | no  | yes |
| 2 | hospital     | male   | midwife | 4 | 8  | 30 | no  | yes |
| 3 | hospital     | female | doctor  | 6 | 24 | 30 | no  | yes |
| 6 | hospital     | male   | doctor  | 3 | 24 | 28 | no  | yes |
| 1 | hospital     | female | midwife | 5 | 8  | 29 | no  | yes |
| 1 | hospital     | male   | doctor  | 3 | 24 | 28 | no  | yes |
| 1 | hospital     | female | midwife | 4 | 8  | 28 | no  | yes |
| 5 | hospital     | male   | doctor  | 4 | 24 | 29 | no  | yes |
| 4 | hospital     | female | doctor  | 3 | 24 | 28 | no  | yes |
| 1 | hospital     | female | midwife | 3 | 8  | 27 | no  | yes |
| 2 | hospital     | female | midwife | 3 | 8  | 27 | no  | yes |
| 2 | hospital     | female | doctor  | 3 | 24 | 28 | no  | yes |
| 1 | hospital     | male   | midwife | 3 | 8  | 27 | no  | yes |
| 1 | hospital     | female | midwife | 5 | 12 | 28 | no  | yes |
| 4 | hospital     | male   | doctor  | 3 | 12 | 29 | no  | yes |
| 1 | healthcentre | female | midwife | 6 | 15 | 30 | yes | yes |
| 1 | healthcentre | female | midwife | 4 | 15 | 28 | no  | no  |
| 1 | healthcentre | male   | midwife | 4 | 8  | 29 | no  | yes |
| 1 | healthcentre | male   | midwife | 6 | 8  | 30 | no  | yes |
| 1 | healthcentre | female | midwife | 5 | 15 | 29 | no  | yes |
| 1 | healthcentre | female | midwife | 6 | 8  | 29 | no  | yes |
| 1 | healthcentre | female | midwife | 4 | 8  | 25 | yes | yes |
| 1 | healthcentre | female | midwife | 2 | 8  | 21 | no  | yes |
| 1 | healthcentre | female | midwife | 2 | 8  | 21 | no  | yes |
| 1 | healthcentre | female | midwife | 4 | 8  | 25 | no  | yes |
| 1 | healthcentre | female | midwife | 4 | 15 | 25 | no  | yes |

|   |              |        |              |   |    |    |     |     |
|---|--------------|--------|--------------|---|----|----|-----|-----|
| 1 | healthcentre | female | midwife      | 5 | 15 | 29 | no  | yes |
| 1 | healthcentre | male   | healthoffice | 4 | 8  | 28 | no  | yes |
| 1 | healthcentre | female | midwife      | 5 | 15 | 29 | yes | yes |
| 1 | healthcentre | female | midwife      | 4 | 15 | 29 | no  | yes |
| 1 | healthcentre | male   | midwife      | 4 | 8  | 28 | no  | yes |
| 1 | healthcentre | female | midwife      | 5 | 8  | 29 | no  | yes |
| 1 | healthcentre | female | midwife      | 5 | 15 | 29 | no  | yes |
| 1 | healthcentre | female | midwife      | 5 | 8  | 29 | yes | yes |
| 1 | healthcentre | female | healthoffice | 5 | 8  | 29 | no  | yes |
| 1 | healthcentre | female | midwife      | 6 | 15 | 28 | no  | yes |
| 1 | healthcentre | female | midwife      | 6 | 8  | 28 | no  | yes |
| 1 | healthcentre | female | midwife      | 6 | 15 | 28 | no  | yes |
| 1 | healthcentre | female | midwife      | 6 | 15 | 28 | no  | yes |
| 1 | healthcentre | female | midwife      | 4 | 8  | 26 | no  | yes |
| 1 | healthcentre | female | midwife      | 6 | 8  | 28 | no  | yes |
| 1 | healthcentre | female | healthoffice | 5 | 15 | 31 | no  | no  |
| 1 | healthcentre | female | midwife      | 6 | 8  | 28 | no  | yes |
| 1 | healthcentre | male   | midwife      | 4 | 15 | 29 | no  | yes |
| 1 | healthcentre | male   | midwife      | 3 | 15 | 28 | no  | yes |
| 1 | healthcentre | female | midwife      | 6 | 8  | 29 | no  | yes |
| 1 | healthcentre | female | midwife      | 4 | 15 | 27 | no  | yes |
| 1 | healthcentre | female | midwife      | 6 | 8  | 28 | yes | yes |
| 1 | healthcentre | male   | midwife      | 5 | 14 | 27 | yes | yes |
| 1 | healthcentre | female | midwife      | 1 | 14 | 24 | yes | yes |
| 1 | healthcentre | female | others       | 5 | 8  | 24 | yes | yes |
| 1 | healthcentre | female | midwife      | 2 | 15 | 23 | yes | yes |
| 2 | healthcentre | male   | midwife      | 5 | 14 | 27 | yes | yes |
| 1 | healthcentre | male   | healthoffice | 6 | 8  | 32 | no  | yes |
| 1 | healthcentre | male   | healthoffice | 4 | 15 | 28 | no  | yes |
| 1 | healthcentre | female | midwife      | 5 | 15 | 29 | no  | yes |
| 1 | healthcentre | female | healthoffice | 5 | 8  | 29 | yes | yes |
| 1 | hospital     | male   | midwife      | 4 | 8  | 28 | no  | yes |
| 1 | hospital     | female | midwife      | 5 | 8  | 29 | no  | yes |
| 4 | hospital     | male   | midwife      | 4 | 8  | 29 | no  | yes |
| 3 | hospital     | male   | doctor       | 4 | 12 | 28 | no  | yes |
| 1 | healthcentre | female | midwife      | 4 | 8  | 28 | no  | yes |
| 1 | healthcentre | male   | midwife      | 3 | 8  | 31 | no  | yes |
| 1 | healthcentre | female | midwife      | 3 | 15 | 28 | no  | yes |
| 1 | healthcentre | female | midwife      | 4 | 8  | 28 | yes | yes |
| 1 | healthcentre | female | midwife      | 4 | 15 | 28 | yes | yes |
| 1 | hospital     | male   | midwife      | 4 | 8  | 29 | no  | yes |
| 1 | hospital     | male   | midwife      | 4 | 8  | 29 | no  | yes |
| 5 | hospital     | male   | doctor       | 4 | 12 | 29 | no  | yes |
| 1 | hospital     | male   | midwife      | 5 | 8  | 29 | no  | yes |
| 4 | hospital     | male   | doctor       | 6 | 12 | 31 | yes | yes |
| 4 | hospital     | male   | doctor       | 5 | 12 | 30 | no  | yes |
| 1 | hospital     | male   | doctor       | 4 | 24 | 29 | no  | yes |
| 1 | hospital     | female | midwife      | 5 | 8  | 29 | no  | yes |
| 1 | hospital     | female | midwife      | 5 | 8  | 29 | yes | yes |
| 2 | hospital     | male   | doctor       | 4 | 24 | 29 | no  | yes |
| 1 | hospital     | male   | doctor       | 4 | 24 | 29 | no  | yes |
| 1 | hospital     | male   | doctor       | 4 | 24 | 32 | no  | yes |

|                |        |              |   |    |        |     |
|----------------|--------|--------------|---|----|--------|-----|
| 1 hospital     | male   | doctor       | 4 | 24 | 32 no  | no  |
| 1 hospital     | male   | midwife      | 2 | 8  | 27 no  | yes |
| 2 hospital     | female | doctor       | 4 | 12 | 29 no  | yes |
| 2 hospital     | male   | doctor       | 3 | 12 | 28 no  | yes |
| 1 hospital     | male   | midwife      | 5 | 8  | 29 no  | yes |
| 2 hospital     | male   | midwife      | 4 | 8  | 28 no  | yes |
| 1 hospital     | male   | midwife      | 4 | 8  | 28 no  | yes |
| 1 hospital     | male   | doctor       | 4 | 12 | 29 no  | yes |
| 1 hospital     | male   | doctor       | 4 | 24 | 29 no  | yes |
| 1 hospital     | male   | midwife      | 5 | 8  | 29 no  | yes |
| 2 hospital     | male   | midwife      | 2 | 8  | 28 no  | yes |
| 4 hospital     | male   | doctor       | 5 | 12 | 32 no  | yes |
| 1 hospital     | male   | midwife      | 6 | 8  | 30 no  | yes |
| 1 hospital     | male   | midwife      | 5 | 8  | 28 no  | yes |
| 2 hospital     | male   | doctor       | 3 | 24 | 28 no  | yes |
| 1 healthcentre | female | midwife      | 4 | 8  | 28 no  | yes |
| 1 healthcentre | female | midwife      | 4 | 8  | 28 yes | yes |
| 1 healthcentre | female | midwife      | 4 | 15 | 28 no  | yes |
| 1 healthcentre | female | midwife      | 3 | 8  | 27 no  | yes |
| 1 healthcentre | female | midwife      | 3 | 8  | 27 no  | yes |
| 1 healthcentre | female | midwife      | 3 | 8  | 27 no  | yes |
| 1 healthcentre | female | midwife      | 3 | 15 | 27 no  | yes |
| 1 healthcentre | female | healthoffice | 4 | 8  | 31 no  | yes |
| 2 hospital     | male   | midwife      | 6 | 8  | 32 no  | yes |
| 1 hospital     | male   | midwife      | 4 | 8  | 28 no  | yes |
| 1 hospital     | female | midwife      | 3 | 8  | 30 no  | yes |



| Q503 | Q504 | Q505 | Q506 | Q507 | Q508 | Q509 | Q510 | Q511 |
|------|------|------|------|------|------|------|------|------|
| yes  | yes  | no   | yes  | yes  |      | yes  | yes  | yes  |
| no   | yes  | no   | no   | yes  | yes  | yes  | no   | no   |
| yes  | yes  | no   | no   | yes  |      | no   | yes  | yes  |
| yes  | yes  | yes  | no   | yes  |      | no   | yes  | yes  |
| yes  | no   | yes  | no   | yes  |      | no   | yes  | yes  |
| yes  | yes  | no   | no   | yes  |      | yes  | yes  | yes  |
| yes  | yes  | no   | no   | yes  |      | no   | yes  | yes  |
| yes  | yes  | yes  | yes  | yes  |      | no   | yes  | yes  |
| yes  | yes  | no   | yes  | yes  |      | no   | yes  | yes  |
| yes  | yes  | no   | yes  | yes  |      | yes  | yes  | yes  |
| yes  | yes  | yes  | yes  | yes  |      | no   | yes  | yes  |
| yes  | yes  | yes  | yes  | yes  |      | no   | yes  | yes  |
| yes  | yes  | yes  | yes  | yes  |      | no   | yes  | yes  |
| yes  | yes  | no   | no   | yes  |      | no   | yes  | yes  |
| yes  | yes  | no   | yes  | yes  |      | no   | yes  | yes  |
| yes  | yes  | yes  | no   | yes  |      | no   | no   | yes  |
| yes  | yes  | yes  | yes  | yes  |      | yes  | yes  | yes  |
| no   | yes  | yes  | yes  | yes  |      | no   | yes  | yes  |
| yes  | yes  | yes  | yes  | yes  |      | no   | yes  | yes  |
| yes  | yes  | no   | yes  | yes  |      | yes  | no   | yes  |
| yes  | yes  | yes  | yes  | yes  |      | no   | yes  | yes  |
| yes  | yes  | yes  | yes  | yes  |      | no   | yes  | yes  |
| yes  | yes  | yes  | yes  | yes  |      | yes  | yes  | yes  |
| yes  | yes  | yes  | yes  | yes  | yes  | yes  | yes  | yes  |
| yes  | yes  | yes  | yes  | yes  |      | yes  | yes  | yes  |
| yes  | yes  | yes  | yes  | yes  |      | no   | yes  | yes  |
| yes  | yes  | yes  | yes  | yes  |      | yes  | yes  | yes  |
| yes  | yes  | yes  | yes  | yes  |      | no   | yes  | yes  |
| yes  | yes  | yes  | yes  | yes  |      | no   | yes  | yes  |
| yes  | yes  | yes  | yes  | yes  |      | no   | yes  | yes  |
| yes  | yes  | yes  | yes  | yes  |      | no   | yes  | yes  |
| yes  | yes  | yes  | yes  | yes  | yes  | yes  | yes  | yes  |
| yes  | yes  | yes  | yes  | yes  | no   | no   | no   | yes  |
| yes  | yes  | yes  | yes  | yes  |      | yes  | yes  | no   |
| yes  | yes  | yes  | yes  | yes  |      | yes  | yes  | yes  |
| yes  | yes  | no   | yes  | yes  | yes  | yes  | yes  | yes  |
| yes  | yes  | yes  | yes  | yes  |      | yes  | no   | yes  |
| yes  | yes  | yes  | no   | yes  |      | yes  | no   | yes  |
| no   | no   | yes  | no   | no   |      | no   | yes  | yes  |
| yes  | yes  | no   | no   | yes  |      | no   | yes  | yes  |
| yes  | yes  | yes  | yes  | yes  |      | yes  | yes  | yes  |
| yes  | yes  | yes  | yes  | yes  |      | yes  | no   | yes  |
| yes  | yes  | yes  | yes  | yes  |      | no   | yes  | yes  |
| yes  | yes  | yes  | yes  | yes  |      | yes  | yes  | yes  |
| yes  | yes  | yes  | yes  | yes  |      | yes  | no   | yes  |
| yes  | yes  | yes  | no   | no   |      | no   | yes  | yes  |
| yes  | yes  | no   | no   | yes  |      | no   | yes  | yes  |
| yes  | yes  | yes  | yes  | yes  |      | yes  | yes  | yes  |
| yes  | yes  | yes  | yes  | yes  |      | yes  | no   | yes  |
| yes  | yes  | yes  | no   | no   |      | no   | yes  | yes  |
| yes  | yes  | yes  | no   | no   |      | no   | yes  | yes  |
| yes  | yes  | yes  | yes  | yes  |      | yes  | yes  | yes  |
| yes  | yes  | yes  | yes  | yes  |      | yes  | yes  | yes  |
| yes  | yes  | yes  | yes  | yes  |      | yes  | no   | yes  |
| yes  | yes  | yes  | no   | no   |      | no   | yes  | yes  |



































| SUM | Respected  | AGE     | OF | MA     | PARITY | CA       | TIMEL | ABC    | ANCCAT | LENGTH | C. EXPERIAN | WORKHRI |
|-----|------------|---------|----|--------|--------|----------|-------|--------|--------|--------|-------------|---------|
| 13  | respected  | 20-29   |    | 2-3    |        | 1.1-2    |       | 5above |        | 2-3    | 6-10        | 8       |
| 9   | disrespect | 20-29   |    | 1      |        | 2.1above |       | 3-4    |        | 2-3    | 5           | 8       |
| 11  | disrespect | 20-29   |    | 1      |        | 2.1above |       | 5above |        | 1      | 5           | 8       |
| 11  | disrespect | 20-29   |    | 1      |        | 2.1above |       | 3-4    |        | 4above | 5           | 13above |
| 9   | disrespect | 20-29   |    | 2-3    |        | 1.1-2    |       | 3-4    |        | 1      | 5           | 8       |
| 12  | disrespect | 20-29   |    | 1      |        | 2.1above |       | 3-4    |        | 1      | 5           | 8       |
| 11  | disrespect | 30above |    | 2-3    |        | 2.1above |       | 3-4    |        | 1      | 5           | 8       |
| 12  | disrespect | 30above |    | 1      |        | 1.1-2    |       | 3-4    |        | 1      | 5           | 8       |
| 11  | disrespect | 30above |    | 2-3    |        | 1        |       | 3-4    |        | 1      | 6-10        | 13above |
| 13  | respected  | 30above |    | 2-3    |        | 2.1above |       | 3-4    |        | 1      | 5           | 8       |
| 11  | disrespect | 20-29   |    | 2-3    |        | 2.1above |       | 3-4    |        | 2-3    | 5           | 8       |
| 12  | disrespect | 30above |    | 2-3    |        | 2.1above |       | 3-4    |        | 1      | 5           | 13above |
| 12  | disrespect | 30above |    | 2-3    |        | 2.1above |       | 1-2    |        | 1      | 5           | 8       |
| 11  | disrespect | 20-29   |    | 1      |        | 2.1above |       | 3-4    |        | 1      | 5           | 8       |
| 12  | disrespect | 20-29   |    | 1      |        | 2.1above |       | 5above |        | 1      | 5           | 13above |
| 10  | disrespect | 20-29   |    | 1      |        | 2.1above |       | 3-4    |        | 1      | 5           | 8       |
| 13  | respected  | 20-29   |    | 2-3    |        | 1        |       | 3-4    |        | 1      | 5           | 8       |
| 11  | disrespect | 30above |    | 2-3    |        | 2.1above |       | 3-4    |        | 1      | 5           | 8       |
| 11  | disrespect | 20-29   |    | 1      |        | 1.1-2    |       | 3-4    |        | 2-3    | 5           | 13above |
| 12  | disrespect | 20-29   |    | 2-3    |        | 2.1above |       | 5above |        | 2-3    | 5           | 8       |
| 12  | disrespect | 30above |    | 2-3    |        | 2.1above |       | 3-4    |        | 1      | 5           | 8       |
| 13  | respected  | 20-29   |    | 1      |        | 2.1above |       | 5above |        | 4above | 5           | 13above |
| 13  | respected  | 30above |    | 4above |        | 2.1above |       | 3-4    |        | 2-3    | 5           | 13above |
| 13  | respected  | 30above |    | 2-3    |        | 1        |       | 5above |        | 2-3    | 5           | 13above |
| 12  | disrespect | 20-29   |    | 1      |        | 2.1above |       | 3-4    |        | 1      | 5           | 8       |
| 10  | disrespect | 20-29   |    | 1      |        | 2.1above |       | 3-4    |        | 1      | 5           | 8       |
| 8   | disrespect | 30above |    | 4above |        | 2.1above |       | 1-2    |        | 1      | 5           | 8       |
| 12  | disrespect | 30above |    | 2-3    |        | 2.1above |       | 1-2    |        | 1      | 6-10        | 9-12    |
| 11  | disrespect | 20-29   |    | 1      |        | 2.1above |       | 3-4    |        | 2-3    | 5           | 8       |
| 12  | disrespect | 20-29   |    | 2-3    |        | 2.1above |       | 3-4    |        | 2-3    | 5           | 8       |
| 10  | disrespect | 30above |    | 2-3    |        | 2.1above |       | 3-4    |        | 1      | 5           | 8       |
| 11  | disrespect | 20-29   |    | 1      |        | 2.1above |       | 3-4    |        | 1      | 5           | 8       |
| 11  | disrespect | 20-29   |    | 1      |        | 2.1above |       | 3-4    |        | 2-3    | 5           | 8       |
| 10  | disrespect | 20-29   |    | 1      |        | 2.1above |       | 3-4    |        | 2-3    | 5           | 8       |
| 11  | disrespect | 20-29   |    | 1      |        | 2.1above |       | 1-2    |        | 2-3    | 5           | 8       |
| 12  | disrespect | 20-29   |    | 2-3    |        | 2.1above |       | 3-4    |        | 2-3    | 5           | 13above |
| 11  | disrespect | 20-29   |    | 1      |        | 2.1above |       | 3-4    |        | 2-3    | 5           | 8       |
| 12  | disrespect | 30above |    | 2-3    |        | 2.1above |       | 3-4    |        | 1      | 5           | 13above |
| 10  | disrespect | 20-29   |    | 1      |        | 2.1above |       |        |        | 1      | 5           | 8       |
| 12  | disrespect | 20-29   |    | 2-3    |        | 1.1-2    |       | 5above |        | 4above | 5           | 13above |
| 7   | disrespect | 20-29   |    | 1      |        | 1        |       | 3-4    |        | 2-3    | 5           | 13above |
| 12  | disrespect | 20-29   |    | 1      |        | 1        |       | 3-4    |        | 1      | 5           | 8       |
| 13  | respected  | 20-29   |    | 1      |        | 2.1above |       | 3-4    |        | 1      | 5           | 8       |
| 12  | disrespect | 20-29   |    | 1      |        | 2.1above |       | 3-4    |        | 2-3    | 5           | 13above |
| 12  | disrespect | 20-29   |    | 1      |        | 2.1above |       | 3-4    |        | 2-3    | 5           | 13above |
| 11  | disrespect | 20-29   |    | 1      |        | 1        |       | 5above |        | 4above | 5           | 8       |
| 7   | disrespect | 20-29   |    | 1      |        | 1        |       | 1-2    |        | 2-3    | 5           | 8       |
| 8   | disrespect | 20-29   |    | 2-3    |        | 2.1above |       | 5above |        | 1      | 6-10        | 8       |
| 13  | respected  | 20-29   |    | 1      |        | 2.1above |       | 3-4    |        | 1      | 6-10        | 8       |
| 10  | disrespect | 20-29   |    | 2-3    |        | 1        |       | 5above |        | 2-3    | 5           | 13above |
| 10  | disrespect | 20-29   |    | 2-3    |        | 2.1above |       | 3-4    |        | 2-3    | 5           | 13above |

|    |            |         |        |          |        |        |      |         |
|----|------------|---------|--------|----------|--------|--------|------|---------|
| 10 | disrespect | 30above | 1      | 2.1above | 3-4    | 1      | 6-10 | 13above |
| 12 | disrespect | 20-29   | 2-3    | 1.1-2    | 3-4    | 4above | 6-10 | 13above |
| 13 | respected  | 30above | 2-3    | 1.1-2    | 3-4    | 2-3    | 6-10 | 13above |
| 11 | disrespect | 30above | 1      | 2.1above | 3-4    | 2-3    | 5    | 8       |
| 10 | disrespect | 20-29   | 1      | 1.1-2    | 3-4    | 1      | 6-10 | 8       |
| 13 | respected  | 20-29   | 1      | 1        | 5above | 1      | 6-10 | 13above |
| 13 | respected  | 20-29   | 2-3    | 2.1above | 3-4    | 1      | 5    | 13above |
| 13 | respected  | 20-29   | 1      | 2.1above | 3-4    | 1      | 5    | 13above |
| 13 | respected  | 20-29   | 2-3    | 2.1above | 3-4    | 1      | 5    | 13above |
| 13 | respected  | 20-29   | 1      | 2.1above | 3-4    | 1      | 5    | 13above |
| 13 | respected  | 20-29   | 2-3    | 1.1-2    | 3-4    | 1      | 5    | 13above |
| 13 | respected  | 20-29   | 1      | 2.1above | 3-4    | 1      | 5    | 13above |
| 13 | respected  | 20-29   | 4above | 2.1above | 3-4    | 1      | 6-10 | 9-12    |
| 11 | disrespect | 20-29   | 2-3    | 2.1above | 3-4    | 1      | 5    | 8       |
| 12 | disrespect | 30above | 1      | 1.1-2    | 3-4    | 2-3    | 5    | 13above |
| 11 | disrespect | 20-29   | 2-3    | 2.1above | 1-2    | 2-3    | 5    | 13above |
| 6  | disrespect | 20-29   | 1      | 2.1above | 3-4    | 2-3    | 5    | 9-12    |
| 11 | disrespect | 30above | 2-3    | 2.1above | 3-4    | 2-3    | 5    | 8       |
| 13 | respected  | 20-29   | 1      | 2.1above | 3-4    | 2-3    | 5    | 13above |
| 12 | disrespect | 20-29   | 2-3    | 2.1above | 3-4    | 2-3    | 5    | 8       |
| 13 | respected  | 20-29   | 1      | 2.1above | 3-4    | 1      | 5    | 8       |
| 13 | respected  | 20-29   | 2-3    | 1.1-2    | 3-4    | 1      | 6-10 | 8       |
| 12 | disrespect | 30above | 2-3    | 2.1above | 3-4    | 1      | 5    | 13above |
| 13 | respected  | 30above | 2-3    | 1        | 3-4    | 1      | 6-10 | 13above |
| 13 | respected  | 20-29   | 2-3    | 1.1-2    | 3-4    | 1      | 5    | 8       |
| 9  | disrespect | 20-29   | 2-3    | 2.1above | 1-2    | 1      | 5    | 8       |
| 13 | respected  | 20-29   | 2-3    | 1        | 3-4    | 1      | 6-10 | 9-12    |
| 12 | disrespect | 20-29   | 2-3    | 2.1above | 1-2    | 1      | 6-10 | 8       |
| 12 | disrespect | 30above | 2-3    | 2.1above | 3-4    | 1      | 5    | 8       |
| 11 | disrespect | 20-29   | 1      | 1.1-2    | 3-4    | 2-3    | 5    | 8       |
| 13 | respected  | 20-29   | 1      | 2.1above | 3-4    | 1      | 5    | 8       |
| 13 | respected  | 20-29   | 2-3    | 1        | 3-4    | 4above | 6-10 | 13above |
| 12 | disrespect | 20-29   | 1      | 1        | 3-4    | 1      | 6-10 | 8       |
| 12 | disrespect | 20-29   | 1      | 2.1above | 3-4    | 2-3    | 6-10 | 8       |
| 11 | disrespect | 30above | 4above | 2.1above | 3-4    | 2-3    | 5    | 8       |
| 13 | respected  | 30above | 2-3    | 1        | 1-2    | 2-3    | 5    | 8       |
| 12 | disrespect | 30above | 4above | 2.1above | 3-4    | 2-3    | 5    | 8       |
| 11 | disrespect | 20-29   | 1      | 2.1above | 5above | 4above | 6-10 | 13above |
| 11 | disrespect | 20-29   | 1      | 1        | 3-4    | 2-3    | 5    | 8       |
| 11 | disrespect | 20-29   | 2-3    | 2.1above | 3-4    | 2-3    | 5    | 8       |
| 8  | disrespect | 20-29   | 1      | 2.1above | 1-2    | 2-3    | 5    | 8       |
| 11 | disrespect | 20-29   | 1      | 2.1above | 3-4    | 2-3    | 5    | 8       |
| 11 | disrespect | 20-29   | 1      | 2.1above | 3-4    | 1      | 5    | 8       |
| 13 | respected  | 20-29   | 1      | 1        | 3-4    | 1      | 5    | 8       |
| 13 | respected  | 20-29   | 2-3    | 2.1above | 3-4    | 1      | 6-10 | 13above |
| 9  | disrespect | 30above | 1      | 2.1above | 1-2    | 2-3    | 5    | 8       |
| 13 | respected  | 20-29   | 1      | 2.1above | 3-4    | 2-3    | 5    | 13above |
| 13 | respected  | 20-29   | 2-3    | 1        | 3-4    | 1      | 5    | 8       |
| 12 | disrespect | 20-29   | 2-3    | 1        | 3-4    | 1      | 5    | 8       |
| 10 | disrespect | 15-19   | 1      | 1        | 3-4    | 1      | 5    | 8       |
| 12 | disrespect | 30above | 4above |          | 3-4    | 4above | 5    | 13above |
| 10 | disrespect | 30above | 2-3    | 1.1-2    | 3-4    | 1      | 5    | 13above |

|    |            |         |        |          |        |        |      |         |
|----|------------|---------|--------|----------|--------|--------|------|---------|
| 11 | disrespect | 30above | 4above | 2.1above | 3-4    | 1      | 5    | 8       |
| 11 | disrespect | 30above | 2-3    | 2.1above | 3-4    | 1      | 5    | 8       |
| 11 | disrespect | 30above | 2-3    | 2.1above | 3-4    | 1      | 5    | 8       |
| 11 | disrespect | 20-29   | 2-3    | 1.1-2    | 3-4    | 1      | 6-10 | 8       |
| 13 | respected  | 20-29   | 2-3    | 2.1above | 3-4    | 2-3    | 5    | 8       |
| 13 | respected  | 20-29   | 2-3    | 2.1above | 5above | 2-3    | 5    | 8       |
| 12 | disrespect | 15-19   | 1      | 2.1above | 3-4    | 2-3    | 6-10 | 13above |
| 11 | disrespect | 20-29   | 4above | 1.1-2    | 1-2    | 4above | 5    | 8       |
| 12 | disrespect | 20-29   | 2-3    |          | 3-4    | 2-3    | 6-10 | 13above |
| 9  | disrespect | 30above | 4above | 2.1above | 3-4    | 2-3    | 5    | 8       |
| 13 | respected  | 20-29   | 2-3    | 2.1above | 3-4    | 1      | 5    | 8       |
| 13 | respected  | 20-29   | 2-3    | 2.1above | 3-4    | 1      | 5    | 8       |
| 12 | disrespect | 30above | 4above |          | 3-4    | 4above | 6-10 | 13above |
| 13 | respected  | 20-29   | 2-3    | 1        | 1-2    | 2-3    | 5    | 13above |
| 12 | disrespect | 20-29   | 1      | 2.1above | 3-4    | 2-3    | 6-10 | 13above |
| 12 | disrespect | 20-29   | 1      |          | 1-2    | 4above | 5    | 8       |
| 8  | disrespect | 20-29   | 2-3    |          | 5above | 4above | 5    | 13above |
| 11 | disrespect | 20-29   | 2-3    | 2.1above | 3-4    | 4above | 6-10 | 13above |
| 12 | disrespect | 30above | 1      | 2.1above | 5above | 2-3    | 5    | 13above |
| 11 | disrespect | 20-29   | 2-3    | 2.1above | 1-2    | 4above | 5    | 13above |
| 13 | respected  | 20-29   | 2-3    |          | 3-4    | 4above | 5    | 13above |
| 13 | respected  | 20-29   | 4above |          | 1-2    | 4above | 5    | 13above |
| 11 | disrespect | 20-29   | 1      | 2.1above |        | 4above | 5    | 8       |
| 13 | respected  | 20-29   | 2-3    | 1        | 3-4    | 1      | 6-10 | 8       |
| 13 | respected  | 30above | 2-3    | 1        | 3-4    | 2-3    | 6-10 | 9-12    |
| 13 | respected  | 20-29   | 2-3    | 1        | 3-4    | 1      | 5    | 8       |
| 13 | respected  | 30above | 4above | 1        | 1-2    | 2-3    | 6-10 | 13above |
| 10 | disrespect | 20-29   | 4above | 1        | 3-4    | 1      | 6-10 | 8       |
| 10 | disrespect | 30above | 4above | 1        |        | 1      | 5    | 9-12    |
| 11 | disrespect | 20-29   | 1      | 2.1above | 3-4    | 1      | 6-10 | 8       |
| 13 | respected  | 30above | 1      | 2.1above | 3-4    | 1      | 5    | 8       |
| 12 | disrespect | 30above | 4above | 2.1above | 3-4    | 2-3    | 5    | 9-12    |
| 11 | disrespect | 30above | 4above | 2.1above | 3-4    | 2-3    | 5    | 9-12    |
| 9  | disrespect | 20-29   | 1      | 1        | 3-4    | 1      | 5    | 8       |
| 9  | disrespect | 30above | 2-3    |          | 3-4    | 4above | 6-10 | 13above |
| 12 | disrespect | 20-29   | 1      | 2.1above | 3-4    | 2-3    | 5    | 13above |
| 12 | disrespect | 20-29   | 1      |          |        | 2-3    | 6-10 | 13above |
| 12 | disrespect | 30above | 4above | 2.1above | 3-4    | 4above | 5    | 13above |
| 11 | disrespect | 30above | 2-3    | 2.1above | 3-4    | 2-3    | 5    | 13above |
| 13 | respected  | 20-29   | 2-3    | 2.1above | 3-4    | 1      | 5    | 8       |
| 11 | disrespect | 20-29   | 2-3    | 2.1above | 3-4    | 2-3    | 5    | 13above |
| 13 | respected  | 20-29   | 1      |          | 3-4    | 4above | 5    | 13above |
| 13 | respected  | 20-29   | 1      | 2.1above | 1-2    | 2-3    | 5    | 8       |
| 13 | respected  | 20-29   | 1      | 2.1above | 3-4    | 2-3    | 5    | 13above |
| 9  | disrespect | 20-29   | 1      | 2.1above | 3-4    | 2-3    | 5    | 13above |
| 13 | respected  | 30above | 4above | 2.1above | 3-4    | 2-3    | 5    | 13above |
| 10 | disrespect | 20-29   | 1      | 2.1above | 3-4    | 1      | 6-10 | 8       |
| 13 | respected  | 20-29   | 2-3    | 2.1above | 3-4    | 2-3    | 5    | 9-12    |
| 13 | respected  | 20-29   | 2-3    | 2.1above | 3-4    | 2-3    | 5    | 9-12    |
| 13 | respected  | 20-29   | 2-3    | 2.1above | 1-2    | 2-3    | 6-10 | 8       |
| 13 | respected  | 30above | 2-3    | 2.1above | 3-4    | 2-3    | 5    | 8       |
| 12 | disrespect | 20-29   | 1      | 2.1above | 3-4    | 2-3    | 5    | 8       |

|    |            |         |        |          |        |        |      |         |
|----|------------|---------|--------|----------|--------|--------|------|---------|
| 12 | disrespect | 20-29   | 2-3    |          | 3-4    | 4above | 5    | 13above |
| 10 | disrespect | 30above | 2-3    | 2.1above | 1-2    | 4above | 6-10 | 13above |
| 8  | disrespect | 20-29   | 1      |          | 3-4    | 2-3    | 6-10 | 13above |
| 13 | respected  | 30above | 2-3    | 1.1-2    | 3-4    | 2-3    | 6-10 | 13above |
| 13 | respected  | 30above | 2-3    | 2.1above | 3-4    | 1      | 5    | 13above |
| 9  | disrespect | 30above | 2-3    | 1        | 5above | 2-3    | 5    | 13above |
| 13 | respected  | 20-29   | 2-3    | 2.1above | 3-4    | 2-3    | 5    | 13above |
| 13 | respected  | 20-29   | 2-3    | 1        | 3-4    | 1      | 5    | 13above |
| 13 | respected  | 20-29   | 1      | 2.1above | 1-2    | 1      | 6-10 | 8       |
| 12 | disrespect | 20-29   | 2-3    | 1        | 3-4    | 1      | 6-10 | 8       |
| 13 | respected  | 20-29   | 2-3    | 1.1-2    | 3-4    | 1      | 5    | 9-12    |
| 11 | disrespect | 20-29   | 1      | 1        | 3-4    | 1      | 6-10 | 8       |
| 13 | respected  | 30above | 2-3    | 1        | 3-4    | 1      | 6-10 | 8       |
| 13 | respected  | 30above | 4above | 2.1above | 3-4    | 1      | 6-10 | 8       |
| 13 | respected  | 20-29   | 1      | 1.1-2    | 3-4    | 1      | 5    | 8       |
| 12 | disrespect | 30above | 4above |          | 3-4    | 2-3    | 5    | 8       |
| 13 | respected  | 30above | 2-3    | 2.1above | 3-4    | 1      | 5    | 8       |
| 12 | disrespect | 20-29   | 2-3    |          | 3-4    | 4above | 5    | 13above |
| 10 | disrespect | 20-29   | 1      | 2.1above | 3-4    | 4above | 5    | 13above |
| 11 | disrespect | 20-29   | 2-3    |          | 3-4    | 2-3    | 5    | 13above |
| 12 | disrespect | 30above | 2-3    | 2.1above | 5above | 2-3    | 5    | 13above |
| 13 | respected  | 20-29   | 1      | 2.1above | 3-4    | 2-3    | 5    | 13above |
| 13 | respected  | 20-29   | 4above | 2.1above | 3-4    | 2-3    | 5    | 9-12    |
| 13 | respected  | 20-29   | 1      | 2.1above | 3-4    | 4above | 5    | 13above |
| 13 | respected  | 30above | 2-3    | 2.1above | 3-4    | 2-3    | 5    | 13above |
| 12 | disrespect | 15-19   | 1      |          | 3-4    | 2-3    | 5    | 9-12    |
| 13 | respected  | 15-19   | 1      |          | 5above | 2-3    | 5    | 13above |
| 8  | disrespect | 20-29   | 1      | 2.1above | 5above | 4above | 5    | 13above |
| 13 | respected  | 20-29   | 1      |          | 5above | 4above | 5    | 13above |
| 10 | disrespect | 20-29   | 2-3    | 1.1-2    | 3-4    | 1      | 5    | 8       |
| 10 | disrespect | 20-29   | 1      | 1.1-2    | 3-4    | 1      | 5    | 8       |
| 13 | respected  | 20-29   | 1      | 2.1above | 3-4    | 4above | 6-10 | 8       |
| 13 | respected  | 20-29   | 1      | 1        | 3-4    | 1      | 6-10 | 8       |
| 13 | respected  | 20-29   | 1      | 2.1above | 3-4    | 1      | 6-10 | 8       |
| 13 | respected  | 20-29   | 1      | 1.1-2    | 3-4    | 2-3    | 6-10 | 13above |
| 13 | respected  | 30above | 1      | 1        | 3-4    | 1      | 6-10 | 13above |
| 13 | respected  | 20-29   | 1      | 1        | 3-4    | 1      | 6-10 | 13above |
| 13 | respected  | 20-29   | 1      | 1        | 3-4    | 1      | 6-10 | 13above |
| 12 | disrespect | 15-19   | 1      | 1        | 3-4    | 1      | 6-10 | 13above |
| 12 | disrespect | 20-29   | 1      | 1.1-2    | 1-2    | 1      | 6-10 | 13above |
| 13 | respected  | 30above | 1      | 2.1above | 3-4    | 1      | 6-10 | 13above |
| 7  | disrespect | 30above | 2-3    | 1.1-2    | 1-2    | 1      | 6-10 | 8       |
| 8  | disrespect | 30above | 2-3    | 1.1-2    | 3-4    | 2-3    | 5    | 8       |
| 13 | respected  | 20-29   | 2-3    | 2.1above | 3-4    | 2-3    | 5    | 13above |
| 13 | respected  | 20-29   | 1      | 2.1above |        | 1      | 5    | 8       |
| 13 | respected  | 30above | 4above | 2.1above | 3-4    | 1      | 6-10 | 13above |
| 11 | disrespect | 30above | 4above | 1        | 3-4    | 1      | 5    | 9-12    |
| 10 | disrespect | 20-29   | 1      | 2.1above | 5above | 1      | 6-10 | 13above |
| 11 | disrespect | 20-29   | 1      | 1.1-2    | 3-4    | 4above | 6-10 | 13above |
| 13 | respected  | 20-29   | 2-3    | 2.1above | 3-4    | 4above | 6-10 | 13above |
| 13 | respected  | 30above | 1      | 1.1-2    | 3-4    | 4above | 5    | 13above |
| 10 | disrespect | 20-29   | 2-3    | 1.1-2    | 3-4    | 4above | 6-10 | 13above |

|    |            |         |        |          |        |        |      |         |
|----|------------|---------|--------|----------|--------|--------|------|---------|
| 10 | disrespect | 30above | 2-3    | 1.1-2    | 5above | 1      | 6-10 | 13above |
| 9  | disrespect | 20-29   | 1      | 2.1above | 5above | 1      | 5    | 8       |
| 11 | disrespect | 20-29   | 1      | 2.1above | 3-4    | 1      | 5    | 8       |
| 13 | respected  | 30above | 4above | 2.1above | 3-4    | 1      | 5    | 8       |
| 9  | disrespect | 15-19   | 1      | 2.1above |        | 1      | 5    | 8       |
| 13 | respected  | 30above | 4above | 2.1above | 5above | 1      | 5    | 8       |
| 13 | respected  | 30above | 4above | 1        | 3-4    | 4above | 5    | 8       |
| 13 | respected  | 20-29   | 1      | 2.1above | 3-4    | 1      | 5    | 8       |
| 13 | respected  | 20-29   | 2-3    | 2.1above | 3-4    | 1      | 5    | 8       |
| 13 | respected  | 30above | 2-3    | 2.1above | 3-4    | 1      | 5    | 8       |
| 13 | respected  | 20-29   | 2-3    | 2.1above | 3-4    | 1      | 5    | 13above |
| 7  | disrespect | 30above | 4above | 2.1above | 3-4    | 2-3    | 5    | 13above |
| 12 | disrespect | 20-29   | 1      | 1.1-2    | 3-4    | 1      | 5    | 8       |
| 12 | disrespect | 20-29   | 1      | 2.1above | 1-2    | 1      | 5    | 8       |
| 10 | disrespect | 30above | 4above | 2.1above | 5above | 1      | 5    | 8       |
| 13 | respected  | 15-19   | 1      | 2.1above | 3-4    | 1      | 5    | 8       |
| 12 | disrespect | 20-29   | 2-3    | 2.1above | 3-4    | 1      | 6-10 | 8       |
| 13 | respected  | 20-29   | 2-3    | 2.1above | 3-4    | 4above | 5    | 13above |
| 13 | respected  | 20-29   | 4above | 2.1above |        | 1      | 5    | 8       |
| 12 | disrespect | 30above | 4above | 2.1above |        | 2-3    | 5    | 8       |
| 13 | respected  | 30above | 1      | 1.1-2    | 3-4    | 2-3    | 5    | 8       |
| 12 | disrespect | 30above | 4above | 1        |        | 2-3    | 5    | 8       |
| 12 | disrespect | 20-29   | 2-3    | 1.1-2    | 1-2    | 4above | 5    | 8       |
| 12 | disrespect | 30above | 2-3    | 2.1above | 3-4    | 4above | 5    | 8       |
| 12 | disrespect | 20-29   | 2-3    | 1        | 3-4    | 1      | 6-10 | 8       |
| 13 | respected  | 20-29   | 1      | 2.1above | 3-4    | 1      | 5    | 8       |
| 11 | disrespect | 30above | 2-3    | 2.1above | 3-4    | 4above | 5    | 8       |
| 7  | disrespect | 30above | 2-3    | 2.1above | 3-4    | 2-3    | 5    | 8       |
| 13 | respected  | 20-29   | 1      | 2.1above | 3-4    | 4above | 6-10 | 9-12    |
| 11 | disrespect | 20-29   | 1      | 2.1above | 3-4    | 4above | 5    | 8       |
| 11 | disrespect | 30above | 4above | 2.1above | 3-4    | 2-3    | 5    | 8       |
| 9  | disrespect | 30above | 2-3    | 2.1above |        | 2-3    | 5    | 8       |
| 10 | disrespect | 20-29   | 2-3    | 1        | 3-4    | 1      | 5    | 8       |
| 10 | disrespect | 20-29   | 2-3    | 2.1above | 3-4    | 2-3    | 6-10 | 13above |
| 13 | respected  | 20-29   | 1      | 1.1-2    | 3-4    | 1      | 5    | 8       |
| 13 | respected  | 20-29   | 1      | 2.1above | 1-2    | 2-3    | 5    | 8       |
| 13 | respected  | 20-29   | 1      | 2.1above | 3-4    | 1      | 5    | 8       |
| 13 | respected  | 20-29   | 1      | 2.1above | 3-4    | 2-3    | 5    | 8       |
| 10 | disrespect | 15-19   | 1      | 2.1above |        | 2-3    | 5    | 13above |
| 13 | respected  | 30above | 1      | 2.1above | 3-4    | 4above | 6-10 | 13above |
| 8  | disrespect | 30above | 2-3    | 2.1above | 1-2    | 2-3    | 5    | 9-12    |
| 9  | disrespect | 30above | 2-3    | 2.1above | 1-2    | 4above | 5    | 13above |
| 12 | disrespect | 30above | 2-3    | 1.1-2    | 3-4    | 1      | 5    | 8       |
| 7  | disrespect | 30above | 2-3    | 2.1above |        | 4above | 5    | 13above |
| 13 | respected  | 20-29   | 1      | 1        | 3-4    | 1      | 5    | 8       |
| 13 | respected  | 20-29   | 1      | 2.1above | 1-2    | 2-3    | 5    | 8       |
| 8  | disrespect | 20-29   | 1      | 2.1above | 3-4    | 4above | 5    | 13above |
| 13 | respected  | 20-29   | 1      | 1        | 3-4    | 1      | 5    | 8       |
| 12 | disrespect | 30above | 4above | 2.1above | 1-2    | 1      | 5    | 13above |
| 13 | respected  | 30above | 2-3    | 1.1-2    | 3-4    | 1      | 5    | 8       |
| 11 | disrespect | 20-29   | 2-3    | 1.1-2    | 3-4    | 4above | 5    | 13above |
| 12 | disrespect | 30above | 2-3    | 2.1above | 1-2    | 2-3    | 5    | 13above |

|               |         |        |          |        |        |      |         |
|---------------|---------|--------|----------|--------|--------|------|---------|
| 8 disrespect  | 20-29   | 1      | 2.1above | 1-2    | 2-3    | 5    | 13above |
| 13 respected  | 20-29   | 1      | 2.1above | 3-4    | 1      | 5    | 8       |
| 8 disrespect  | 20-29   | 1      | 2.1above | 3-4    | 2-3    | 5    | 8       |
| 12 disrespect | 30above | 4above | 2.1above | 3-4    | 2-3    | 5    | 13above |
| 13 respected  | 30above | 4above | 2.1above | 3-4    | 4above | 5    | 13above |
| 13 respected  | 30above | 2-3    | 1        | 3-4    | 1      | 5    | 8       |
| 13 respected  | 30above | 4above | 2.1above | 3-4    | 4above | 6-10 | 13above |
| 13 respected  | 20-29   | 1      | 2.1above | 1-2    | 2-3    | 5    | 8       |
| 11 disrespect | 20-29   | 1      | 2.1above |        | 4above | 6-10 | 13above |
| 8 disrespect  | 30above | 4above | 2.1above | 1-2    | 4above | 6-10 | 13above |
| 13 respected  | 30above | 2-3    | 1.1-2    | 3-4    | 2-3    | 6-10 | 8       |
| 11 disrespect | 30above | 2-3    | 2.1above | 5above | 2-3    | 5    | 8       |
| 13 respected  | 20-29   | 2-3    | 2.1above | 3-4    | 4above | 6-10 | 13above |
| 12 disrespect | 20-29   | 1      | 2.1above | 3-4    | 2-3    | 5    | 8       |
| 12 disrespect | 15-19   | 1      | 2.1above | 3-4    | 4above | 6-10 | 13above |
| 13 respected  | 30above | 4above | 1        | 3-4    | 1      | 5    | 8       |
| 11 disrespect | 30above | 4above | 2.1above | 3-4    | 4above | 6-10 | 13above |
| 8 disrespect  | 20-29   | 1      | 2.1above | 1-2    | 4above | 6-10 | 13above |
| 11 disrespect | 20-29   | 2-3    | 2.1above | 1-2    | 4above | 6-10 | 9-12    |
| 13 respected  | 20-29   | 1      | 1.1-2    | 5above | 2-3    | 5    | 8       |
| 13 respected  | 15-19   | 1      | 2.1above | 1-2    | 2-3    | 5    | 9-12    |
| 13 respected  | 30above | 2-3    | 2.1above | 5above | 4above | 6-10 | 13above |
| 9 disrespect  | 15-19   | 1      | 2.1above | 3-4    | 2-3    | 6-10 | 8       |
| 12 disrespect | 20-29   | 1      | 2.1above | 1-2    | 2-3    | 5    | 13above |
| 9 disrespect  | 30above | 2-3    |          | 5above | 4above | 5    | 13above |
| 13 respected  | 20-29   | 1      | 1.1-2    | 3-4    | 1      | 5    | 8       |
| 13 respected  | 20-29   | 2-3    | 2.1above | 3-4    | 2-3    | 5    | 8       |
| 12 disrespect | 20-29   | 2-3    | 2.1above | 1-2    | 2-3    | 5    | 8       |
| 13 respected  | 20-29   | 1      | 2.1above | 3-4    | 2-3    | 6-10 | 13above |
| 10 disrespect | 30above | 2-3    | 2.1above | 3-4    | 4above | 5    | 13above |
| 13 respected  | 20-29   | 1      | 2.1above | 3-4    | 1      | 5    | 8       |
| 13 respected  | 30above | 1      | 2.1above | 3-4    | 1      | 5    | 13above |
| 13 respected  | 30above | 2-3    | 1        | 3-4    | 1      | 5    | 8       |
| 12 disrespect | 30above | 4above | 2.1above | 1-2    | 4above | 5    | 13above |
| 13 respected  | 30above | 4above | 2.1above | 3-4    | 4above | 5    | 13above |
| 13 respected  | 30above | 2-3    | 2.1above | 3-4    | 1      | 5    | 8       |
| 10 disrespect | 20-29   | 1      | 2.1above | 1-2    | 2-3    | 5    | 8       |
| 12 disrespect | 30above | 2-3    | 1.1-2    | 1-2    | 2-3    | 5    | 13above |
| 13 respected  | 30above | 2-3    | 1        | 3-4    | 1      | 5    | 8       |
| 13 respected  | 30above | 2-3    | 1.1-2    | 3-4    | 1      | 5    | 9-12    |
| 12 disrespect | 30above | 4above | 2.1above | 3-4    | 4above | 5    | 9-12    |
| 13 respected  | 20-29   | 2-3    | 1.1-2    | 3-4    | 1      | 6-10 | 13above |
| 5 disrespect  | 20-29   | 1      | 2.1above | 3-4    | 1      | 5    | 13above |
| 13 respected  | 20-29   | 2-3    | 2.1above | 1-2    | 1      | 5    | 8       |
| 11 disrespect | 20-29   | 1      | 1        | 3-4    | 1      | 6-10 | 8       |
| 13 respected  | 20-29   | 1      | 1        | 3-4    | 1      | 5    | 13above |
| 12 disrespect | 30above | 2-3    | 1        | 3-4    | 1      | 6-10 | 8       |
| 13 respected  | 30above | 2-3    | 2.1above | 3-4    | 1      | 5    | 8       |
| 12 disrespect | 20-29   | 1      | 1.1-2    | 3-4    | 1      | 5    | 8       |
| 13 respected  | 20-29   | 4above | 1        | 3-4    | 1      | 5    | 8       |
| 11 disrespect | 30above | 4above | 1.1-2    | 3-4    | 1      | 5    | 8       |
| 13 respected  | 20-29   | 1      | 1        | 1-2    | 1      | 5    | 13above |

|    |             |         |        |          |        |        |      |         |
|----|-------------|---------|--------|----------|--------|--------|------|---------|
| 13 | respected   | 20-29   | 2-3    | 2.1above | 3-4    | 1      | 5    | 13above |
| 13 | respected   | 20-29   | 2-3    | 2.1above | 3-4    | 1      | 5    | 8       |
| 13 | respected   | 30above | 2-3    | 2.1above | 1-2    | 1      | 5    | 13above |
| 13 | respected   | 20-29   | 2-3    | 2.1above | 3-4    | 1      | 5    | 13above |
| 13 | respected   | 30above | 2-3    | 1.1-2    | 3-4    | 1      | 5    | 8       |
| 13 | respected   | 20-29   | 2-3    | 2.1above | 1-2    | 1      | 5    | 8       |
| 13 | respected   | 20-29   | 1      | 2.1above | 3-4    | 1      | 5    | 13above |
| 13 | respected   | 20-29   | 1      | 2.1above | 1-2    | 1      | 5    | 8       |
| 13 | respected   | 20-29   | 2-3    | 2.1above | 3-4    | 1      | 5    | 8       |
| 13 | respected   | 20-29   | 2-3    | 2.1above | 1-2    | 1      | 6-10 | 13above |
| 10 | disrespecte | 20-29   | 1      | 1        | 3-4    | 1      | 6-10 | 8       |
| 13 | respected   | 20-29   | 1      | 1        | 3-4    | 1      | 6-10 | 13above |
| 12 | disrespecte | 20-29   | 2-3    | 1.1-2    | 1-2    | 1      | 6-10 | 13above |
| 13 | respected   | 30above | 2-3    | 2.1above | 3-4    | 1      | 5    | 8       |
| 13 | respected   | 20-29   | 1      | 1.1-2    | 1-2    | 1      | 6-10 | 8       |
| 8  | disrespecte | 20-29   | 2-3    | 1.1-2    | 3-4    | 1      | 5    | 13above |
| 13 | respected   | 15-19   | 1      | 1.1-2    | 3-4    | 1      | 6-10 | 8       |
| 13 | respected   | 20-29   | 1      | 1        | 3-4    | 1      | 5    | 13above |
| 11 | disrespecte | 20-29   | 1      | 1.1-2    | 1-2    | 1      | 5    | 13above |
| 13 | respected   | 30above | 2-3    | 1.1-2    | 1-2    | 1      | 6-10 | 8       |
| 13 | respected   | 20-29   | 1      | 1        | 3-4    | 1      | 5    | 13above |
| 11 | disrespecte | 30above | 2-3    | 1        | 3-4    | 1      | 6-10 | 8       |
| 13 | respected   | 20-29   | 2-3    | 1        | 3-4    | 1      | 5    | 13above |
| 13 | respected   | 20-29   | 1      | 1        | 3-4    | 1      | 5    | 13above |
| 13 | respected   | 30above | 2-3    | 2.1above | 3-4    | 1      | 5    | 8       |
| 12 | disrespecte | 20-29   | 2-3    | 2.1above | 3-4    | 1      | 5    | 13above |
| 13 | respected   | 20-29   | 2-3    | 1        | 1-2    | 2-3    | 5    | 13above |
| 13 | respected   | 20-29   | 2-3    | 2.1above | 1-2    | 1      | 6-10 | 8       |
| 13 | respected   | 30above | 2-3    | 2.1above | 1-2    | 1      | 5    | 13above |
| 10 | disrespecte | 20-29   | 1      | 1.1-2    | 5above | 1      | 5    | 13above |
| 13 | respected   | 15-19   | 1      | 1.1-2    | 3-4    | 1      | 5    | 8       |
| 11 | disrespecte | 20-29   | 2-3    | 1        | 3-4    | 1      | 5    | 8       |
| 12 | disrespecte | 20-29   | 2-3    | 1        | 3-4    | 1      | 5    | 8       |
| 11 | disrespecte | 20-29   | 1      | 2.1above | 1-2    | 4above | 5    | 8       |
| 11 | disrespecte | 20-29   | 1      | 2.1above | 1-2    | 2-3    | 5    | 9-12    |
| 13 | respected   | 20-29   | 1      | 1.1-2    | 3-4    | 1      | 5    | 8       |
| 13 | respected   | 20-29   | 1      | 1.1-2    | 1-2    | 1      | 5    | 8       |
| 13 | respected   | 30above | 4above | 2.1above | 3-4    | 1      | 5    | 13above |
| 13 | respected   | 20-29   | 2-3    | 1.1-2    | 1-2    | 1      | 5    | 8       |
| 13 | respected   | 20-29   | 2-3    | 2.1above | 1-2    | 1      | 5    | 13above |
| 11 | disrespecte | 20-29   | 1      | 1        | 3-4    | 1      | 5    | 8       |
| 11 | disrespecte | 20-29   | 2-3    | 2.1above | 1-2    | 1      | 5    | 8       |
| 11 | disrespecte | 30above | 2-3    | 2.1above | 1-2    | 4above | 5    | 9-12    |
| 11 | disrespecte | 30above | 2-3    | 1.1-2    | 3-4    | 1      | 5    | 8       |
| 11 | disrespecte | 30above | 4above | 2.1above | 1-2    | 4above | 6-10 | 9-12    |
| 11 | disrespecte | 30above | 2-3    | 2.1above | 3-4    | 4above | 5    | 9-12    |
| 9  | disrespecte | 20-29   | 2-3    | 2.1above | 1-2    | 1      | 5    | 13above |
| 13 | respected   | 20-29   | 1      | 1        | 3-4    | 1      | 5    | 8       |
| 13 | respected   | 20-29   | 1      | 1        | 3-4    | 1      | 5    | 8       |
| 12 | disrespecte | 30above | 4above | 2.1above | 1-2    | 2-3    | 5    | 13above |
| 10 | disrespecte | 30above | 2-3    | 1        | 3-4    | 1      | 5    | 13above |
| 12 | disrespecte | 20-29   | 2-3    | 2.1above | 1-2    | 1      | 5    | 13above |

|                        |        |          |        |        |      |         |
|------------------------|--------|----------|--------|--------|------|---------|
| 11 disrespecte 20-29   | 1      | 1.1-2    | 1-2    | 1      | 5    | 13above |
| 13 respected 20-29     | 1      | 1.1-2    | 1-2    | 1      | 5    | 8       |
| 11 disrespecte 20-29   | 1      | 2.1above | 1-2    | 2-3    | 5    | 9-12    |
| 10 disrespecte 30above | 2-3    | 2.1above | 3-4    | 2-3    | 5    | 9-12    |
| 11 disrespecte 20-29   | 2-3    | 2.1above | 1-2    | 1      | 5    | 8       |
| 11 disrespecte 20-29   | 2-3    | 2.1above | 1-2    | 2-3    | 5    | 8       |
| 11 disrespecte 30above | 2-3    | 1        | 5above | 1      | 5    | 8       |
| 11 disrespecte 20-29   | 2-3    | 1.1-2    | 3-4    | 1      | 5    | 9-12    |
| 13 respected 20-29     | 2-3    | 1.1-2    | 5above | 1      | 5    | 13above |
| 10 disrespecte 20-29   | 2-3    | 2.1above | 1-2    | 1      | 5    | 8       |
| 10 disrespecte 30above | 2-3    | 2.1above | 1-2    | 2-3    | 5    | 8       |
| 11 disrespecte 20-29   | 2-3    | 2.1above | 1-2    | 4above | 5    | 9-12    |
| 11 disrespecte 30above | 2-3    | 1        | 3-4    | 1      | 6-10 | 8       |
| 11 disrespecte 20-29   | 2-3    | 1        | 3-4    | 1      | 5    | 8       |
| 11 disrespecte 20-29   | 2-3    | 2.1above | 3-4    | 2-3    | 5    | 13above |
| 13 respected 30above   | 4above | 1.1-2    | 1-2    | 1      | 5    | 8       |
| 13 respected 20-29     | 2-3    | 1.1-2    | 3-4    | 1      | 5    | 8       |
| 11 disrespecte 20-29   | 1      | 1        | 3-4    | 1      | 5    | 13above |
| 13 respected 20-29     | 2-3    | 2.1above | 1-2    | 1      | 5    | 8       |
| 13 respected 15-19     | 1      | 1.1-2    | 1-2    | 1      | 5    | 8       |
| 13 respected 20-29     | 2-3    | 1        | 3-4    | 1      | 5    | 8       |
| 13 respected 20-29     | 1      | 1        | 3-4    | 1      | 5    | 13above |
| 13 respected 20-29     | 2-3    | 1.1-2    | 3-4    | 1      | 5    | 8       |
| 12 disrespecte 20-29   | 1      | 2.1above | 5above | 2-3    | 6-10 | 8       |
| 12 disrespecte 15-19   | 1      | 1.1-2    | 3-4    | 1      | 5    | 8       |
| 11 disrespecte 20-29   | 1      | 1        | 3-4    | 1      | 5    | 8       |



| AGE     | ATTC | ANYCOMT | WEALTHI | AGENEW | SUMDIGN | Dignity | SUMCONS | Consent | SUMCONF |
|---------|------|---------|---------|--------|---------|---------|---------|---------|---------|
| 31above | yes  |         | 3       | 3      | 3       | 1       | 2       | 1       | 2       |
| 26-30   | yes  |         | 2       | 2      | 2       | 0       | 1       | 0       | 1       |
| 26-30   | no   |         | 3       | 2      | 3       | 1       | 1       | 0       | 1       |
| 26-30   | no   |         | 2       | 2      | 3       | 1       | 1       | 0       | 1       |
| 26-30   | yes  |         | 4       | 2      | 2       | 0       | 1       | 0       | 1       |
| 26-30   | no   |         | 3       | 2      | 3       | 1       | 1       | 0       | 2       |
| 26-30   | no   |         | 5       | 2      | 3       | 1       | 1       | 0       | 1       |
| 26-30   | no   |         | 3       | 2      | 3       | 1       | 2       | 1       | 1       |
| 31above | no   |         | 2       | 4      | 3       | 1       | 2       | 1       | 1       |
| 26-30   | no   |         | 2       | 2      | 3       | 1       | 2       | 1       | 2       |
| 26-30   | yes  |         | 4       | 2      | 3       | 1       | 2       | 1       | 1       |
| 26-30   | yes  |         | 5       | 2      | 3       | 1       | 2       | 1       | 1       |
| 26-30   | no   |         | 4       | 2      | 3       | 1       | 2       | 1       | 1       |
| 26-30   | no   |         | 2       | 2      | 3       | 1       | 1       | 0       | 1       |
| 26-30   | no   |         | 4       | 2      | 3       | 1       | 2       | 1       | 1       |
| 26-30   | yes  |         | 5       | 2      | 3       | 1       | 1       | 0       | 0       |
| 26-30   | no   |         | 1       | 2      | 3       | 1       | 2       | 1       | 2       |
| 26-30   | no   |         | 3       | 1      | 2       | 0       | 2       | 1       | 1       |
| 26-30   | yes  |         | 2       | 2      | 3       | 1       | 2       | 1       | 1       |
| 26-30   | yes  |         | 4       | 1      | 3       | 1       | 2       | 1       | 1       |
| 26-30   | no   |         | 4       | 2      | 3       | 1       | 2       | 1       | 1       |
| 26-30   | no   |         | 1       | 1      | 3       | 1       | 2       | 1       | 2       |
| 26-30   | yes  |         | 3       | 2      | 3       | 1       | 2       | 1       | 2       |
| 26-30   | no   |         | 5       | 2      | 3       | 1       | 2       | 1       | 2       |
| 26-30   | no   |         | 1       | 1      | 2       | 0       | 2       | 1       | 2       |
| 26-30   | no   |         | 1       | 2      | 2       | 0       | 2       | 1       | 0       |
| 26-30   | yes  |         | 5       | 1      | 0       | 0       | 1       | 0       | 2       |
| 26-30   | yes  |         | 2       | 2      | 2       | 0       | 2       | 1       | 2       |
| 26-30   | no   |         | 5       | 2      | 3       | 1       | 2       | 1       | 0       |
| 26-30   | yes  |         | 4       | 1      | 3       | 1       | 2       | 1       | 1       |
| 31above | no   |         | 2       | 2      | 3       | 1       | 1       | 0       | 0       |
| 31above | no   |         | 1       | 2      | 2       | 0       | 2       | 1       | 1       |
| 26-30   | no   |         | 2       | 2      | 3       | 1       | 1       | 0       | 1       |
| 26-30   | no   |         | 2       | 2      | 2       | 0       | 1       | 0       | 1       |
| 26-30   | no   |         | 1       | 2      | 3       | 1       | 1       | 0       | 1       |
| 26-30   | yes  |         | 5       | 2      | 3       | 1       | 2       | 1       | 1       |
| 26-30   | yes  |         | 2       | 2      | 3       | 1       | 1       | 0       | 1       |
| 26-30   | no   |         | 2       | 2      | 3       | 1       | 2       | 1       | 1       |
| 26-30   | no   |         | 3       | 2      | 3       | 1       | 1       | 0       | 1       |
| 26-30   | yes  |         | 3       | 2      | 3       | 1       | 2       | 1       | 1       |
| 26-30   | yes  |         | 2       | 2      | 3       | 1       | 1       | 0       | 0       |
| 26-30   | no   |         | 1       | 1      | 3       | 1       | 2       | 1       | 2       |
| 26-30   | no   |         | 1       | 1      | 3       | 1       | 2       | 1       | 2       |
| 26-30   | no   |         | 3       | 2      | 2       | 0       | 2       | 1       | 2       |
| 31above | yes  |         | 5       | 3      | 3       | 1       | 2       | 1       | 1       |
| 31above | yes  |         | 1       | 3      | 3       | 1       | 1       | 0       | 1       |
| 26-30   | yes  |         | 5       | 2      | 0       | 0       | 0       | 0       | 1       |
| 31above | no   |         | 1       | 5      | 2       | 0       | 1       | 0       | 1       |
| 26-30   | yes  |         | 2       | 2      | 3       | 1       | 2       | 1       | 2       |
| 26-30   | no   |         | 4       | 2      | 3       | 1       | 2       | 1       | 1       |
| 31above | no   |         | 5       | 4      | 3       | 1       | 0       | 0       | 1       |

|         |     |   |   |   |   |   |   |   |
|---------|-----|---|---|---|---|---|---|---|
| 31above | yes | 4 | 3 | 3 | 1 | 1 | 0 | 0 |
| 31above | yes | 3 | 3 | 3 | 1 | 2 | 1 | 1 |
| 31above | no  | 4 | 5 | 3 | 1 | 2 | 1 | 2 |
| 26-30   | yes | 2 | 2 | 3 | 1 | 2 | 1 | 1 |
| 31above | yes | 1 | 3 | 3 | 1 | 1 | 0 | 0 |
| 31above | no  | 4 | 3 | 3 | 1 | 2 | 1 | 2 |
| 31above | no  | 5 | 4 | 3 | 1 | 2 | 1 | 2 |
| 31above | yes | 5 | 4 | 3 | 1 | 2 | 1 | 2 |
| 31above | no  | 4 | 4 | 3 | 1 | 2 | 1 | 2 |
| 25      | no  | 4 | 1 | 3 | 1 | 2 | 1 | 2 |
| 25      | no  | 2 | 1 | 3 | 1 | 2 | 1 | 2 |
| 31above | yes | 2 | 4 | 3 | 1 | 2 | 1 | 2 |
| 26-30   | no  | 4 | 2 | 3 | 1 | 2 | 1 | 2 |
| 31above | yes | 2 | 3 | 3 | 1 | 1 | 0 | 1 |
| 26-30   | yes | 3 | 2 | 3 | 1 | 2 | 1 | 1 |
| 31above | yes | 4 | 3 | 3 | 1 | 1 | 0 | 1 |
| 31above | yes | 2 | 3 | 1 | 0 | 0 | 0 | 1 |
| 26-30   | yes | 3 | 2 | 3 | 1 | 1 | 0 | 1 |
| 26-30   | yes | 2 | 2 | 3 | 1 | 2 | 1 | 2 |
| 31above | no  | 2 | 3 | 3 | 1 | 2 | 1 | 1 |
| 31above | no  | 1 | 4 | 3 | 1 | 2 | 1 | 2 |
| 31above | no  | 1 | 3 | 3 | 1 | 2 | 1 | 2 |
| 31above | no  | 4 | 4 | 3 | 1 | 2 | 1 | 1 |
| 31above | yes | 1 | 4 | 3 | 1 | 2 | 1 | 2 |
| 26-30   | no  | 1 | 2 | 3 | 1 | 2 | 1 | 2 |
| 26-30   | no  | 1 | 2 | 3 | 1 | 0 | 0 | 2 |
| 31above | no  | 1 | 3 | 3 | 1 | 2 | 1 | 2 |
| 31above | yes | 1 | 3 | 3 | 1 | 1 | 0 | 2 |
| 25      | no  | 5 | 1 | 3 | 1 | 1 | 0 | 2 |
| 25      | no  | 2 | 1 | 3 | 1 | 0 | 0 | 2 |
| 26-30   | no  | 5 | 2 | 3 | 1 | 2 | 1 | 2 |
| 31above | yes | 3 | 4 | 3 | 1 | 2 | 1 | 2 |
| 26-30   | no  | 2 | 2 | 3 | 1 | 1 | 0 | 2 |
| 26-30   | no  | 3 | 2 | 3 | 1 | 2 | 1 | 1 |
| 25      | no  | 4 | 1 | 3 | 1 | 2 | 1 | 2 |
| 31above | no  | 1 | 3 | 3 | 1 | 2 | 1 | 2 |
| 25      | no  | 3 | 1 | 3 | 1 | 1 | 0 | 2 |
| 31above | yes | 1 | 3 | 3 | 1 | 1 | 0 | 1 |
| 26-30   | no  | 2 | 1 | 3 | 1 | 0 | 0 | 2 |
| 26-30   | yes | 4 | 1 | 3 | 1 | 1 | 0 | 1 |
| 26-30   | yes | 2 | 2 | 2 | 0 | 1 | 0 | 1 |
| 31above | no  | 1 | 3 | 3 | 1 | 2 | 1 | 2 |
| 26-30   | no  | 2 | 1 | 3 | 1 | 2 | 1 | 1 |
| 26-30   | no  | 1 | 2 | 3 | 1 | 2 | 1 | 2 |
| 31above | yes | 5 | 4 | 3 | 1 | 2 | 1 | 2 |
| 26-30   | yes | 5 | 2 | 2 | 0 | 0 | 0 | 2 |
| 26-30   | no  | 3 | 2 | 3 | 1 | 2 | 1 | 2 |
| 26-30   | no  | 4 | 2 | 3 | 1 | 2 | 1 | 2 |
| 31above | no  | 4 | 3 | 3 | 1 | 2 | 1 | 2 |
| 26-30   | no  | 1 | 1 | 2 | 0 | 1 | 0 | 1 |
| 26-30   | yes | 1 | 2 | 3 | 1 | 2 | 1 | 1 |
| 26-30   | no  | 1 | 1 | 3 | 1 | 0 | 0 | 1 |

|         |     |   |   |   |   |   |   |   |
|---------|-----|---|---|---|---|---|---|---|
| 26-30   | no  | 4 | 2 | 3 | 1 | 1 | 0 | 1 |
| 31above | no  | 5 | 3 | 3 | 1 | 1 | 0 | 1 |
| 26-30   | no  | 5 | 2 | 3 | 1 | 1 | 0 | 1 |
| 31above | no  | 5 | 3 | 3 | 1 | 1 | 0 | 1 |
| 26-30   | no  | 3 | 2 | 3 | 1 | 2 | 1 | 2 |
| 26-30   | no  | 1 | 2 | 3 | 1 | 2 | 1 | 2 |
| 31above | yes | 5 | 4 | 3 | 1 | 1 | 0 | 2 |
| 26-30   | no  | 4 | 2 | 3 | 1 | 0 | 0 | 2 |
| 31above | no  | 1 | 4 | 3 | 1 | 2 | 1 | 1 |
| 26-30   | yes | 4 | 2 | 2 | 0 | 1 | 0 | 2 |
| 26-30   | no  | 3 | 2 | 3 | 1 | 2 | 1 | 2 |
| 26-30   | no  | 5 | 2 | 3 | 1 | 2 | 1 | 2 |
| 31above | yes | 3 | 5 | 3 | 1 | 1 | 0 | 2 |
| 31above | yes | 2 | 3 | 3 | 1 | 2 | 1 | 2 |
| 31above | yes | 3 | 5 | 3 | 1 | 2 | 1 | 1 |
| 26-30   | yes | 1 | 2 | 3 | 1 | 1 | 0 | 2 |
| 31above | yes | 4 | 3 | 2 | 0 | 2 | 1 | 0 |
| 31above | yes | 4 | 5 | 3 | 1 | 1 | 0 | 1 |
| 26-30   | yes | 3 | 2 | 3 | 1 | 1 | 0 | 2 |
| 31above | yes | 4 | 2 | 3 | 1 | 2 | 1 | 0 |
| 31above | yes | 5 | 3 | 3 | 1 | 2 | 1 | 2 |
| 31above | yes | 5 | 3 | 3 | 1 | 2 | 1 | 2 |
| 26-30   | yes | 3 | 2 | 3 | 1 | 0 | 0 | 2 |
| 31above | no  | 3 | 3 | 3 | 1 | 2 | 1 | 2 |
| 31above | no  | 2 | 3 | 3 | 1 | 2 | 1 | 2 |
| 31above | no  | 5 | 3 | 3 | 1 | 2 | 1 | 2 |
| 31above | no  | 5 | 4 | 3 | 1 | 2 | 1 | 2 |
| 31above | yes | 3 | 3 | 3 | 1 | 1 | 0 | 2 |
| 31above | no  | 5 | 3 | 3 | 1 | 2 | 1 | 2 |
| 26-30   | no  | 4 | 2 | 3 | 1 | 1 | 0 | 1 |
| 26-30   | no  | 5 | 2 | 3 | 1 | 2 | 1 | 2 |
| 26-30   | yes | 3 | 2 | 3 | 1 | 2 | 1 | 1 |
| 25      | yes | 2 | 1 | 3 | 1 | 1 | 0 | 2 |
| 26-30   | no  | 3 | 2 | 3 | 1 | 2 | 1 | 1 |
| 31above | yes | 4 | 3 | 3 | 1 | 2 | 1 | 2 |
| 31above | yes | 3 | 3 | 3 | 1 | 2 | 1 | 1 |
| 31above | yes | 1 | 3 | 3 | 1 | 1 | 0 | 2 |
| 26-30   | yes | 5 | 2 | 3 | 1 | 1 | 0 | 2 |
| 31above | yes | 1 | 3 | 2 | 0 | 2 | 1 | 1 |
| 26-30   | yes | 1 | 2 | 3 | 1 | 2 | 1 | 2 |
| 26-30   | yes | 5 | 2 | 3 | 1 | 2 | 1 | 2 |
| 26-30   | yes | 3 | 2 | 3 | 1 | 2 | 1 | 2 |
| 31above | yes | 1 | 3 | 3 | 1 | 2 | 1 | 2 |
| 26-30   | no  | 5 | 2 | 3 | 1 | 2 | 1 | 2 |
| 26-30   | yes | 2 | 2 | 3 | 1 | 1 | 0 | 0 |
| 26-30   | no  | 2 | 2 | 3 | 1 | 2 | 1 | 2 |
| 26-30   | yes | 4 | 2 | 1 | 0 | 2 | 1 | 2 |
| 26-30   | no  | 3 | 2 | 3 | 1 | 2 | 1 | 2 |
| 31above | no  | 5 | 3 | 3 | 1 | 2 | 1 | 2 |
| 31above | no  | 3 | 3 | 3 | 1 | 2 | 1 | 2 |
| 26-30   | no  | 5 | 2 | 3 | 1 | 2 | 1 | 2 |
| 26-30   | no  | 5 | 2 | 3 | 1 | 2 | 1 | 2 |

|         |     |   |   |   |   |   |   |   |
|---------|-----|---|---|---|---|---|---|---|
| 26-30   | yes | 3 | 2 | 3 | 1 | 2 | 1 | 1 |
| 31above | yes | 4 | 3 | 3 | 1 | 0 | 0 | 2 |
| 31above | yes | 1 | 3 | 1 | 0 | 1 | 0 | 1 |
| 26-30   | no  | 2 | 2 | 3 | 1 | 2 | 1 | 2 |
| 26-30   | yes | 2 | 1 | 3 | 1 | 2 | 1 | 2 |
| 26-30   | no  | 5 | 2 | 3 | 1 | 0 | 0 | 2 |
| 26-30   | no  | 3 | 2 | 3 | 1 | 2 | 1 | 2 |
| 26-30   | yes | 3 | 2 | 3 | 1 | 2 | 1 | 2 |
| 26-30   | no  | 3 | 2 | 3 | 1 | 2 | 1 | 2 |
| 26-30   | no  | 1 | 2 | 3 | 1 | 2 | 1 | 1 |
| 26-30   | no  | 4 | 1 | 3 | 1 | 2 | 1 | 2 |
| 31above | no  | 1 | 3 | 3 | 1 | 2 | 1 | 2 |
| 26-30   | no  | 5 | 2 | 3 | 1 | 2 | 1 | 2 |
| 26-30   | no  | 1 | 2 | 3 | 1 | 2 | 1 | 2 |
| 25      | no  | 3 | 1 | 3 | 1 | 2 | 1 | 2 |
| 26-30   | no  | 3 | 2 | 3 | 1 | 2 | 1 | 1 |
| 26-30   | no  | 2 | 2 | 3 | 1 | 2 | 1 | 2 |
| 26-30   | yes | 3 | 2 | 3 | 1 | 2 | 1 | 1 |
| 26-30   | yes | 4 | 2 | 3 | 1 | 1 | 0 | 0 |
| 26-30   | no  | 5 | 2 | 2 | 0 | 2 | 1 | 1 |
| 31above | yes | 4 | 3 | 3 | 1 | 1 | 0 | 2 |
| 26-30   | yes | 1 | 2 | 3 | 1 | 2 | 1 | 2 |
| 26-30   | no  | 5 | 2 | 3 | 1 | 2 | 1 | 2 |
| 31above | yes | 3 | 3 | 3 | 1 | 2 | 1 | 2 |
| 31above | no  | 4 | 3 | 3 | 1 | 2 | 1 | 2 |
| 31above | yes | 5 | 3 | 3 | 1 | 1 | 0 | 2 |
| 26-30   | yes | 5 | 2 | 3 | 1 | 2 | 1 | 2 |
| 31above | yes | 5 | 2 | 2 | 0 | 0 | 0 | 2 |
| 26-30   | yes | 1 | 2 | 3 | 1 | 2 | 1 | 2 |
| 26-30   | no  | 4 | 2 | 3 | 1 | 2 | 1 | 0 |
| 26-30   | no  | 2 | 1 | 3 | 1 | 2 | 1 | 0 |
| 26-30   | yes | 2 | 2 | 3 | 1 | 2 | 1 | 2 |
| 26-30   | no  | 1 | 2 | 3 | 1 | 2 | 1 | 2 |
| 26-30   | no  | 5 | 2 | 3 | 1 | 2 | 1 | 2 |
| 31above | yes | 5 | 4 | 3 | 1 | 2 | 1 | 2 |
| 26-30   | no  | 4 | 2 | 3 | 1 | 2 | 1 | 2 |
| 26-30   | no  | 2 | 2 | 3 | 1 | 2 | 1 | 2 |
| 31above | no  | 2 | 3 | 3 | 1 | 2 | 1 | 2 |
| 31above | no  | 4 | 3 | 3 | 1 | 2 | 1 | 1 |
| 26-30   | yes | 1 | 2 | 3 | 1 | 1 | 0 | 2 |
| 31above | no  | 3 | 3 | 3 | 1 | 2 | 1 | 2 |
| 26-30   | no  | 5 | 2 | 1 | 0 | 0 | 0 | 2 |
| 26-30   | yes | 5 | 2 | 2 | 0 | 0 | 0 | 2 |
| 26-30   | no  | 1 | 2 | 3 | 1 | 2 | 1 | 2 |
| 26-30   | no  | 3 | 1 | 3 | 1 | 2 | 1 | 2 |
| 26-30   | no  | 4 | 2 | 3 | 1 | 2 | 1 | 2 |
| 26-30   | yes | 3 | 1 | 3 | 1 | 2 | 1 | 1 |
| 26-30   | no  | 2 | 1 | 3 | 1 | 1 | 0 | 1 |
| 31above | no  | 3 | 3 | 3 | 1 | 2 | 1 | 1 |
| 31above | no  | 1 | 3 | 3 | 1 | 2 | 1 | 2 |
| 31above | no  | 2 | 3 | 3 | 1 | 2 | 1 | 2 |
| 31above | no  | 5 | 3 | 3 | 1 | 2 | 1 | 1 |

|         |     |   |   |   |   |   |   |   |
|---------|-----|---|---|---|---|---|---|---|
| 26-30   | no  | 2 | 1 | 3 | 1 | 1 | 0 | 1 |
| 26-30   | no  | 4 | 2 | 3 | 1 | 1 | 0 | 2 |
| 25      | no  | 4 | 1 | 3 | 1 | 1 | 0 | 2 |
| 25      | no  | 3 | 1 | 3 | 1 | 2 | 1 | 2 |
| 25      | no  | 5 | 1 | 2 | 0 | 2 | 1 | 1 |
| 26-30   | no  | 2 | 2 | 3 | 1 | 2 | 1 | 2 |
| 26-30   | no  | 4 | 2 | 3 | 1 | 2 | 1 | 2 |
| 26-30   | no  | 5 | 1 | 3 | 1 | 2 | 1 | 2 |
| 26-30   | no  | 4 | 1 | 3 | 1 | 2 | 1 | 2 |
| 26-30   | no  | 5 | 1 | 3 | 1 | 2 | 1 | 2 |
| 26-30   | no  | 3 | 2 | 3 | 1 | 2 | 1 | 2 |
| 26-30   | yes | 1 | 2 | 2 | 0 | 1 | 0 | 1 |
| 26-30   | no  | 4 | 2 | 3 | 1 | 2 | 1 | 1 |
| 26-30   | no  | 2 | 2 | 2 | 0 | 2 | 1 | 2 |
| 26-30   | no  | 3 | 1 | 3 | 1 | 0 | 0 | 1 |
| 26-30   | no  | 5 | 2 | 3 | 1 | 2 | 1 | 2 |
| 31above | yes | 1 | 3 | 3 | 1 | 2 | 1 | 1 |
| 26-30   | no  | 5 | 2 | 3 | 1 | 2 | 1 | 2 |
| 26-30   | no  | 5 | 2 | 3 | 1 | 2 | 1 | 2 |
| 26-30   | no  | 5 | 1 | 3 | 1 | 2 | 1 | 2 |
| 26-30   | yes | 3 | 2 | 3 | 1 | 2 | 1 | 2 |
| 26-30   | no  | 5 | 1 | 3 | 1 | 2 | 1 | 2 |
| 26-30   | no  | 5 | 1 | 3 | 1 | 1 | 0 | 2 |
| 26-30   | no  | 2 | 2 | 3 | 1 | 1 | 0 | 2 |
| 31above | no  | 1 | 3 | 3 | 1 | 1 | 0 | 2 |
| 26-30   | yes | 5 | 2 | 3 | 1 | 2 | 1 | 2 |
| 26-30   | yes | 5 | 2 | 2 | 0 | 1 | 0 | 2 |
| 26-30   | no  | 5 | 2 | 2 | 0 | 0 | 0 | 0 |
| 31above | yes | 1 | 3 | 3 | 1 | 2 | 1 | 2 |
| 26-30   | yes | 1 | 1 | 3 | 1 | 1 | 0 | 2 |
| 26-30   | no  | 3 | 1 | 3 | 1 | 0 | 0 | 2 |
| 26-30   | no  | 1 | 2 | 2 | 0 | 1 | 0 | 2 |
| 26-30   | no  | 4 | 1 | 3 | 1 | 1 | 0 | 0 |
| 31above | yes | 1 | 3 | 2 | 0 | 2 | 1 | 2 |
| 25      | no  | 4 | 1 | 3 | 1 | 2 | 1 | 2 |
| 25      | no  | 2 | 1 | 3 | 1 | 2 | 1 | 2 |
| 25      | yes | 1 | 1 | 3 | 1 | 2 | 1 | 2 |
| 25      | no  | 2 | 1 | 3 | 1 | 2 | 1 | 2 |
| 25      | yes | 1 | 1 | 2 | 0 | 2 | 1 | 2 |
| 31above | yes | 1 | 2 | 3 | 1 | 2 | 1 | 2 |
| 26-30   | yes | 1 | 2 | 2 | 0 | 0 | 0 | 2 |
| 26-30   | yes | 4 | 2 | 3 | 1 | 1 | 0 | 1 |
| 26-30   | no  | 3 | 2 | 2 | 0 | 2 | 1 | 2 |
| 26-30   | yes | 1 | 2 | 1 | 0 | 0 | 0 | 2 |
| 26-30   | no  | 4 | 2 | 3 | 1 | 2 | 1 | 2 |
| 26-30   | no  | 1 | 2 | 3 | 1 | 2 | 1 | 2 |
| 26-30   | yes | 4 | 2 | 2 | 0 | 0 | 0 | 2 |
| 26-30   | no  | 4 | 2 | 3 | 1 | 2 | 1 | 2 |
| 26-30   | no  | 4 | 2 | 3 | 1 | 2 | 1 | 1 |
| 25      | no  | 4 | 1 | 3 | 1 | 2 | 1 | 2 |
| 31above | yes | 3 | 3 | 3 | 1 | 0 | 0 | 2 |
| 31above | yes | 3 | 3 | 3 | 1 | 2 | 1 | 1 |

|         |     |   |   |   |   |   |   |   |
|---------|-----|---|---|---|---|---|---|---|
| 26-30   | yes | 1 | 2 | 2 | 0 | 1 | 0 | 1 |
| 25      | no  | 3 | 1 | 3 | 1 | 2 | 1 | 2 |
| 26-30   | no  | 5 | 2 | 2 | 0 | 0 | 0 | 2 |
| 31above | no  | 4 | 3 | 3 | 1 | 2 | 1 | 1 |
| 31above | yes | 3 | 3 | 3 | 1 | 2 | 1 | 2 |
| 26-30   | no  | 1 | 2 | 3 | 1 | 2 | 1 | 2 |
| 31above | yes | 4 | 4 | 3 | 1 | 2 | 1 | 2 |
| 26-30   | yes | 5 | 2 | 3 | 1 | 2 | 1 | 2 |
| 31above | yes | 3 | 3 | 2 | 0 | 1 | 0 | 2 |
| 31above | yes | 1 | 3 | 2 | 0 | 0 | 0 | 2 |
| 31above | yes | 5 | 3 | 3 | 1 | 2 | 1 | 2 |
| 25      | yes | 5 | 1 | 3 | 1 | 1 | 0 | 1 |
| 31above | yes | 3 | 3 | 3 | 1 | 2 | 1 | 2 |
| 26-30   | no  | 5 | 2 | 3 | 1 | 2 | 1 | 1 |
| 31above | yes | 1 | 3 | 3 | 1 | 2 | 1 | 1 |
| 26-30   | no  | 2 | 2 | 3 | 1 | 2 | 1 | 2 |
| 31above | yes | 4 | 3 | 3 | 1 | 1 | 0 | 1 |
| 31above | yes | 1 | 3 | 1 | 0 | 1 | 0 | 2 |
| 31above | yes | 4 | 3 | 3 | 1 | 2 | 1 | 1 |
| 26-30   | no  | 1 | 2 | 3 | 1 | 2 | 1 | 2 |
| 26-30   | yes | 4 | 2 | 3 | 1 | 2 | 1 | 2 |
| 31above | yes | 2 | 3 | 3 | 1 | 2 | 1 | 2 |
| 26-30   | yes | 3 | 2 | 2 | 0 | 0 | 0 | 2 |
| 26-30   | yes | 2 | 2 | 3 | 1 | 2 | 1 | 1 |
| 26-30   | no  | 2 | 2 | 2 | 0 | 2 | 1 | 1 |
| 26-30   | no  | 1 | 2 | 3 | 1 | 2 | 1 | 2 |
| 26-30   | yes | 4 | 2 | 3 | 1 | 2 | 1 | 2 |
| 26-30   | no  | 2 | 2 | 3 | 1 | 2 | 1 | 1 |
| 26-30   | yes | 1 | 2 | 3 | 1 | 2 | 1 | 2 |
| 26-30   | yes | 2 | 2 | 3 | 1 | 0 | 0 | 1 |
| 26-30   | no  | 4 | 2 | 3 | 1 | 2 | 1 | 2 |
| 26-30   | no  | 3 | 2 | 3 | 1 | 2 | 1 | 2 |
| 26-30   | no  | 4 | 2 | 3 | 1 | 2 | 1 | 2 |
| 26-30   | yes | 2 | 2 | 3 | 1 | 2 | 1 | 1 |
| 26-30   | yes | 4 | 2 | 3 | 1 | 2 | 1 | 2 |
| 26-30   | no  | 5 | 1 | 3 | 1 | 2 | 1 | 2 |
| 26-30   | yes | 2 | 1 | 3 | 1 | 0 | 0 | 1 |
| 26-30   | yes | 3 | 2 | 3 | 1 | 2 | 1 | 1 |
| 26-30   | no  | 4 | 1 | 3 | 1 | 2 | 1 | 2 |
| 26-30   | no  | 3 | 2 | 3 | 1 | 2 | 1 | 2 |
| 26-30   | yes | 3 | 2 | 3 | 1 | 1 | 0 | 2 |
| 26-30   | no  | 3 | 2 | 3 | 1 | 2 | 1 | 2 |
| 26-30   | no  | 1 | 2 | 0 | 0 | 0 | 0 | 1 |
| 26-30   | no  | 1 | 2 | 3 | 1 | 2 | 1 | 2 |
| 26-30   | no  | 3 | 2 | 3 | 1 | 0 | 0 | 2 |
| 26-30   | no  | 2 | 2 | 3 | 1 | 2 | 1 | 2 |
| 26-30   | no  | 5 | 2 | 3 | 1 | 1 | 0 | 2 |
| 25      | no  | 5 | 1 | 3 | 1 | 2 | 1 | 2 |
| 25      | no  | 2 | 1 | 3 | 1 | 1 | 0 | 2 |
| 25      | no  | 2 | 1 | 3 | 1 | 2 | 1 | 2 |
| 25      | no  | 3 | 1 | 3 | 1 | 1 | 0 | 2 |
| 25      | no  | 1 | 1 | 3 | 1 | 2 | 1 | 2 |

|         |     |   |   |   |   |   |   |   |
|---------|-----|---|---|---|---|---|---|---|
| 26-30   | no  | 2 | 2 | 3 | 1 | 2 | 1 | 2 |
| 26-30   | no  | 3 | 2 | 3 | 1 | 2 | 1 | 2 |
| 26-30   | no  | 3 | 2 | 3 | 1 | 2 | 1 | 2 |
| 26-30   | no  | 2 | 2 | 3 | 1 | 2 | 1 | 2 |
| 26-30   | no  | 3 | 2 | 3 | 1 | 2 | 1 | 2 |
| 26-30   | yes | 2 | 2 | 3 | 1 | 2 | 1 | 2 |
| 26-30   | no  | 2 | 2 | 3 | 1 | 2 | 1 | 2 |
| 26-30   | no  | 2 | 2 | 3 | 1 | 2 | 1 | 2 |
| 26-30   | no  | 2 | 2 | 3 | 1 | 2 | 1 | 2 |
| 26-30   | yes | 2 | 2 | 3 | 1 | 2 | 1 | 2 |
| 26-30   | no  | 1 | 2 | 3 | 1 | 1 | 0 | 2 |
| 26-30   | no  | 1 | 2 | 3 | 1 | 2 | 1 | 2 |
| 26-30   | no  | 3 | 2 | 3 | 1 | 2 | 1 | 2 |
| 26-30   | no  | 5 | 1 | 3 | 1 | 2 | 1 | 2 |
| 26-30   | no  | 2 | 2 | 3 | 1 | 2 | 1 | 2 |
| 31above | no  | 2 | 2 | 1 | 0 | 0 | 0 | 2 |
| 26-30   | no  | 4 | 2 | 3 | 1 | 2 | 1 | 2 |
| 26-30   | no  | 4 | 2 | 3 | 1 | 2 | 1 | 2 |
| 26-30   | no  | 5 | 2 | 3 | 1 | 0 | 0 | 2 |
| 26-30   | no  | 4 | 2 | 3 | 1 | 2 | 1 | 2 |
| 26-30   | no  | 1 | 1 | 3 | 1 | 2 | 1 | 2 |
| 26-30   | yes | 1 | 2 | 3 | 1 | 2 | 1 | 2 |
| 26-30   | no  | 5 | 1 | 3 | 1 | 2 | 1 | 2 |
| 25      | no  | 4 | 1 | 3 | 1 | 2 | 1 | 2 |
| 25      | no  | 2 | 1 | 3 | 1 | 2 | 1 | 2 |
| 25      | no  | 4 | 1 | 3 | 1 | 1 | 0 | 2 |
| 26-30   | no  | 2 | 1 | 3 | 1 | 2 | 1 | 2 |
| 31above | no  | 2 | 3 | 3 | 1 | 2 | 1 | 2 |
| 26-30   | no  | 3 | 2 | 3 | 1 | 2 | 1 | 2 |
| 26-30   | no  | 2 | 2 | 2 | 0 | 0 | 0 | 2 |
| 26-30   | no  | 5 | 2 | 3 | 1 | 2 | 1 | 2 |
| 26-30   | yes | 4 | 2 | 3 | 1 | 1 | 0 | 1 |
| 26-30   | no  | 4 | 2 | 3 | 1 | 2 | 1 | 2 |
| 26-30   | yes | 4 | 2 | 3 | 1 | 1 | 0 | 1 |
| 26-30   | yes | 2 | 2 | 3 | 1 | 1 | 0 | 1 |
| 26-30   | no  | 4 | 2 | 3 | 1 | 2 | 1 | 2 |
| 31above | no  | 1 | 2 | 3 | 1 | 2 | 1 | 2 |
| 26-30   | no  | 4 | 2 | 3 | 1 | 2 | 1 | 2 |
| 26-30   | no  | 2 | 2 | 3 | 1 | 2 | 1 | 2 |
| 26-30   | no  | 4 | 2 | 3 | 1 | 2 | 1 | 2 |
| 26-30   | yes | 3 | 2 | 3 | 1 | 1 | 0 | 1 |
| 26-30   | yes | 3 | 2 | 3 | 1 | 1 | 0 | 1 |
| 26-30   | yes | 5 | 2 | 3 | 1 | 1 | 0 | 1 |
| 26-30   | yes | 4 | 2 | 3 | 1 | 1 | 0 | 1 |
| 31above | yes | 5 | 2 | 3 | 1 | 1 | 0 | 1 |
| 26-30   | yes | 2 | 2 | 3 | 1 | 1 | 0 | 1 |
| 26-30   | yes | 1 | 2 | 3 | 1 | 1 | 0 | 1 |
| 26-30   | no  | 4 | 2 | 3 | 1 | 2 | 1 | 2 |
| 26-30   | no  | 1 | 2 | 3 | 1 | 2 | 1 | 2 |
| 26-30   | yes | 3 | 2 | 3 | 1 | 2 | 1 | 1 |
| 26-30   | no  | 2 | 2 | 3 | 1 | 0 | 0 | 1 |
| 31above | yes | 3 | 3 | 3 | 1 | 2 | 1 | 1 |

|         |     |   |   |   |   |   |   |   |
|---------|-----|---|---|---|---|---|---|---|
| 31above | yes | 2 | 3 | 2 | 0 | 2 | 1 | 1 |
| 26-30   | yes | 1 | 1 | 3 | 1 | 2 | 1 | 2 |
| 26-30   | yes | 3 | 2 | 3 | 1 | 1 | 0 | 1 |
| 26-30   | yes | 3 | 2 | 3 | 1 | 0 | 0 | 1 |
| 26-30   | yes | 5 | 2 | 3 | 1 | 1 | 0 | 1 |
| 26-30   | yes | 1 | 2 | 3 | 1 | 1 | 0 | 1 |
| 26-30   | no  | 3 | 2 | 3 | 1 | 1 | 0 | 1 |
| 26-30   | yes | 5 | 2 | 3 | 1 | 1 | 0 | 1 |
| 26-30   | no  | 3 | 2 | 3 | 1 | 2 | 1 | 2 |
| 26-30   | yes | 3 | 2 | 3 | 1 | 0 | 0 | 1 |
| 26-30   | yes | 5 | 2 | 3 | 1 | 0 | 0 | 1 |
| 31above | yes | 5 | 3 | 3 | 1 | 1 | 0 | 1 |
| 26-30   | no  | 3 | 2 | 3 | 1 | 1 | 0 | 1 |
| 26-30   | no  | 2 | 2 | 3 | 1 | 1 | 0 | 1 |
| 26-30   | no  | 1 | 2 | 3 | 1 | 1 | 0 | 1 |
| 26-30   | no  | 5 | 2 | 3 | 1 | 2 | 1 | 2 |
| 26-30   | no  | 3 | 2 | 3 | 1 | 2 | 1 | 2 |
| 26-30   | no  | 1 | 2 | 3 | 1 | 1 | 0 | 2 |
| 26-30   | no  | 4 | 1 | 3 | 1 | 2 | 1 | 2 |
| 26-30   | no  | 1 | 1 | 3 | 1 | 2 | 1 | 2 |
| 26-30   | no  | 4 | 1 | 3 | 1 | 2 | 1 | 2 |
| 26-30   | no  | 3 | 1 | 3 | 1 | 2 | 1 | 2 |
| 31above | no  | 3 | 2 | 3 | 1 | 2 | 1 | 2 |
| 31above | yes | 5 | 3 | 3 | 1 | 1 | 0 | 2 |
| 26-30   | no  | 5 | 2 | 3 | 1 | 1 | 0 | 2 |
| 26-30   | no  | 2 | 2 | 3 | 1 | 1 | 0 | 1 |

















|   |   |   |   |   |
|---|---|---|---|---|
| 0 | 2 | 1 | 2 | 1 |
| 1 | 2 | 1 | 2 | 1 |
| 0 | 2 | 1 | 2 | 1 |
| 0 | 2 | 1 | 2 | 1 |
| 0 | 2 | 1 | 2 | 1 |
| 0 | 2 | 1 | 2 | 1 |
| 0 | 2 | 1 | 2 | 1 |
| 1 | 2 | 1 | 2 | 1 |
| 0 | 2 | 1 | 2 | 1 |
| 0 | 2 | 1 | 2 | 1 |
| 0 | 2 | 1 | 2 | 1 |
| 0 | 2 | 1 | 2 | 1 |
| 1 | 2 | 1 | 2 | 1 |
| 1 | 2 | 1 | 2 | 1 |
| 1 | 2 | 1 | 1 | 0 |
| 1 | 2 | 1 | 2 | 1 |
| 1 | 2 | 1 | 2 | 1 |
| 1 | 2 | 1 | 2 | 1 |
| 1 | 2 | 1 | 2 | 1 |
| 1 | 2 | 1 | 2 | 1 |
| 1 | 2 | 1 | 2 | 1 |
| 1 | 2 | 1 | 2 | 1 |
| 0 | 2 | 1 | 2 | 1 |
